# Supplementary material for: Temporal Variation in Genetic Composition of Migratory Helicoverpa Zea in Peripheral Populations
Source: Insects. 2020 Jul 23;11(8):463. doi: 10.3390/insects11080463 (PMC7469216; doi:10.3390/insects11080463)
Supplement: Supplementary file 1 [file insects-11-00463-s001.xlsx]

## Sheet: Table S1-GBS Options
Table S1. Parameter options selected to configure various plugins used for GBS analysis. Plugin name, option, value, and a brief description of the function of the plugin are listed on each column.

## Sheet: Table S2-SNP Loci
Table S2. Single nucleotide polymorphism (SNP) loci developed for Helicoverpa zea using the genome assembly (Pearce et al., 2017) , scaffold numbers of the SNPs in genome assembly versions 5 and 6, type of polymorphism and the flanking sequence of the SNP. SNPs are shown in the sequence using IUPAC codes and are marked with square brackets. K: G/T; M: A/C; R: A/G; Y: C/T.
Locus	H_zea Assembly 6 Scaffold #	H_zea Assembly 5 Scaffold (published)	SNP Polymorphism	SNP with flanking sequence
Hz6_0	0	3	G/T	ATAAAATAATGTTGCTCACATCATGACGTAAAATATAACATTTAATTTACCTAGTTATATAAAAACAACAAGACTACATGAACATTCACCACTTTGGTGTAACACTTGATTTTCAGTATTCAAT[K]TTTGACCCAGAATTTGTTGACCAGTCACTTTGATAGACAAAGCTATCTGTCCAGTCATAAGAAGAAACAATTAGATTTCACACAATTAGAAGTATGTCACAGCTAGGAAAGCTTC
Hz6_1	1	0	A/G	CGTACTCGTGCAAACGAACCTTAAGTATTATTATGTAGGTTAACCTTTGGTCTAAAAAACACGTGTCAACCTCACGGGCTTCGAACAAGGATTTT[R}CTCGTACAAATCATTGAATGATGCAATGCAACTTAGATATGCAATTTATGGCTTCTTATAATAATCTCATTACAATGCGCGAACTTGTTACGTTTTTGCA
Hz6_2	2	171	C/G	ACAATTTAGATTACAATGTGGCCACTTTTAACTTGCACTAAAACTAAAAGTCTTGGCACAAATAAAATATCAGTTTCAGATGTATATAAATTGATA[S]AATCAAATAAAATTAAAAAGTTCTTGAGCATGATAAATATTAAAACGATTGAATGTAAACTAAAATCCGCGAGATAGGTGTACAAGTGTATAAATGTCATTGTT
Hz6_5	5	63	A/C	AGGTGAACTTCTATGCTGCTAAACTATTTGTTTGGAGAAATCAATGCGCGCATGTTGGTCCCTTCCAAAATATTTGCAAACCTTT[M]AGCAAACTTCATAAGATGTAAAGAAAATTTTGAAAACTACATACTGTATTGTCTCATATCAACATTTTTTTATAAAAATAACTTTGTGGGAAATATGTCAACATTATTGTGTACA
Hz6_12	12	1011	G/T	AATGACGAAATCTACACTTAACTCTTTAATTGTTGGCATTGTCTAGAAACTATTAGTAAACAATATTTTAGTAGATTTGTCAATGTAAAT[K]AGCTTCTACAAAAATGTTCTTCAAACCTAACAAAGTTACTTTCGTTAATATTTTACTAACTACAGACTCAGACTCTAAAAACTAAGAAGAGAGATTAACTGGAAAGTTACATCAATTCACTAGCACATTCACTTAAAATCCGGGTTG[M]AAAGTATTTTTTTTTAATAGAATTTGGGTAGGTATTCTAGAATTTTTGCAATCTTATATTAAATCAGTTTA
Hz6_17	17	10	C/T	TTGTTGCTCTTTTAGATCCATTGTGTTACGGTGCGTTTTAAACCAAATGAGGGAATATAGCCCAGCCTATACAATTATTTTAGAGAAAACAGCGACAGAATTGACTG[Y]GTCTGTTTACATTAAAAATATTGAATACAGAAATAACACAAAACAATGTGAATGTGCGTTTAGTCTAAACGCACCCTTACACAGGTTGTTATA
Hz6_18	18	21	A/G	ATTGTAGGAACTGGCAACACTGTGAGACGCCATCATGGCGGCTAAAAGGCGCCATTTATGAAACTAAGAACATTCAAAGCGG[R}AAATTCGTACTATTTCAAAGGATTTATGATAAAAAGGTATCACAGACTGAGTTAAGGAAGAATGCTTCGGAAGAGAAAAGGA
Hz6_19	19	77	C/T	TCGGTTTCCTTGTAGCTGATGGATGGGATTGGGTCTCCGTATTTATACGCGAAAGCGATCTCAGCGATTTGCTTCCTGCG[Y]TCCCTGTAGTCCTTGTCAGCGAAACCAGGATGGTTCATATCCAATTCAGGTTCATATTTGGTCATGAGATGATTGCAGTTATC
Hz6_25	25	20	A/G	TCACTTTGTGAACTATTAATCAAGAACCGATTTTAATAGTAATTATGTTTAAT[R}GTTCTAGCTCTTCAAAAACTCAAACTAATGATCTATTATCCTGCTCACAGTATGCCATACGCTAACGCATATT
Hz6_38	38	94	A/C	GGATATTTCATAATAATTTTGGGATTTTTAATTCTAGTTATCTTAATGCTGCCTCTAGGTTCTCGTTTTTTGTTGTTTAATATTTC[M]TGAATTTTAATCTAATGAGAAGTAAGTGTTTCAATACCGGTTGACTCTTTCTTACTTTTTAATCCATTAGGGACGAT
Hz6_43	43	305	C/G	GAAATATAAATTGTATGGGTTTTCGAGAAGTGGGCCTTAGTGTGCTATTTATTTAGTTAAGTTTAGTCGGA[S]AACATCACACGGTGCCTCACCAATAAGTACCTGCTAGTTTAGTTAGTTTGACGAAAGCTGAGTAACTGCGTCACG
Hz6_47	47	275	C/T	CTTCAGCCTTCTACATTCAGTAGTCTGTCTTAGATGTACAATTAATTTGGTTCCCATTTTGTCAAG[Y]TAAACTCGAAGTATACCTTTATCCTTGCTTTCTAAACTTTCCGCAGCTACCTAAGCTTCCATTCCGTCACCAAAATGC
Hz6_50	50	16	C/T	CGTCACAGGCAGCAGTTGAAAGCGGGAAACATTCAACTATAACTTTCAAGTACTACAAATTCGCTACTAC[Y]GTGCTAGGTGTGCTCTGTAGGTACTTATATGAAGTGCGCTGTGCAATAATATTATGCATGAATGTGAAATATGAACAAAT
Hz6_55	55	28	A/G	TTAACATATTAAAATGTGTTGAAGATCACCAATATTCAAACTCAATGCAAATATTATGCTGTAGCCAATTTACGAATTTAATGTAATTTGT[R}AATGGCACACGTAGGCGCTTGCACATGTGGTGAGCGCCTGAGTCTAAAAATAAACTCGACCCAAGATTGCAAGTGAATCGT
Hz6_58	58	32	C/T	CAGTTTCCAGTACACTGGACCCTGAGGTGACAACGTCTTCAACGATGAGGCATGACTGGCCAGCCTTGTAGTGTCCTTCAATAGATTT[Y]TTGGTTCCGTAAGCTTTTGTTTCTTTACGTCTCATGAGCATGGACTTTTTGGTTAGTACGCTCAGTATAGTGGCAATGGG
Hz6_65	65	70	G/T	TTTGGCCTAGGCCTGCTTGGCGTCCTGCTCGAAGTCCAGCAGCTCGGCGAGGTTGCTGATCTC[K]ATCTCCTGCACGCGGTTGCCGGCGAACTGCATGAAGTCATGCGGGGGAGCGTCGGCTGAACGCTTGCGGAC
Hz6_68	68	376	A/C	CCGAACTTGTCAACAAAGAAATGTTTTGGGTGGTCACAGAGGTAGTTAATGAACAAACCCTTGC[M]AGGCGTCAAAAGATCATAAAACAGTTCATTAAAGTTGCACGTCATTGCAAGGAATGCAAAAACTTTAACTCAAT
Hz6_70	70	37	C/T	GCAGTTGGAGAAGGCATACAAGCTATGTAGCCCATGCCGGAGAGTTCTCCAAATGAAATTGCA[Y]AAAGAGAAAGAAACCCTTCTGGGGTCTAAATTATTAGAAACAAGGACATCTGAAAGGATAAATCAAAAGCAG
Hz6_73	73	519	A/G	TGCGATTATGGTATTCATTCACTGACAAGCCGACCTGAAAGTCGGTTATTTTATGAAAATGACAGGAT[R}AAGAAGTTTCTGTACCTACATTATATTGCAAGCATTCACTGGTTCGTATTCCCGACACACAAGT
Hz6_79	79	1194	A/G	GAAAATCAAATACATTTTTAATATTTATGCAACAGGTCATAAATATAAAAACGCGAAAAACGGATCA[R}TATTAAATTATCTTCATATAAATTTTTCGAAACCTACTAATCCTTACCTTGTATAAAGTAAGTTTAA
Hz6_89	89	5	A/G	CGAAAACCTTGTCCTGTGCACCATAAACTTCATCGTTTCGTACTAAAGGAATAATTTATT[R}GTCATCTATGTTTTCACTAGCTTATTTTCCTAGTTTAAATACTTATTGCTATTGCCTTGGTGTTCAGAACAAATTTTCG
Hz6_91	91	44	C/T	ACCGATTCGGGACTTCTCGACTTCGATCGGACAAGATCGTCGGCTAATTTCAAATGTGGAGCGTTGAAGAAGTC[Y]TTGTAAAACTCCGCAAGCTCTCTGATTGGGTGGTGATCAGCGAAAGGAAAGTGAAGAAGTTTCAATGGTGGTTCGTTCTCATTTCTGAACCC
Hz6_96	96	119	C/G	ATAAATGTCTAAAATAAAAAATGTTTAACGTAAATAATTGAATGTTGATAGTGAATTTGGCGA[S]GTAGTTGCTAGTGACTACAGAACTAATCCGGAGTAACACGACATCGTGACACGCGCCGTGTCATTGTACTTAGTTAGCGTTTA
Hz6_103	103	545	A/C	CCGAGGTATTCGTCATTTTAGCAACGATTTTTTAAGTCCTGGATTGATCTACAGTTCATCATAATAAG[M]CCTCTATAGCACCTATCTACAGACTTCCCGATTTTCAAATATGAAAGTAGGTAGATAATCAATGTATCAAT
Hz6_104	104	61	A/G	AGATAAAGTAGATAAAAAGGATATGAAAGAAGAGAAAGACCCCAGAGAAGAATACAAAAAGAAAAGAGAAATGCT[R}CTCAACCCACCTAAAGTCGAAGTACCTGAAATAAACTTAGTTGATGATCAAGTGACAAATGTTCCTTTTGAAAAC
Hz6_105	105	607	C/G	AAAAAGGTAACTCCGTATCGCAGTCGACCGGACGCCGTCGAATGCAAAAAATGAGGTACTCGCGAAACGA[S]GGTGCGAAGGAGGTACGATATTTTAGAAACACCGGACGCGTACTGAGCAACCATTCAAAGTCACACACTT
Hz6_113	113	878	A/G	GGAGGAAGAGCCAAAACCAGAGCTCGACAAAAAACTAAAGAAGCAGAAAAAGAAGGAAGCACTCGTTAAATTTGACTTTCATAATGAT[R}CAGACAGTGACGAGGAAGACTTTTTGCAAGTGAAAAGGGCAGATGTGGATGTAGGTGATGAGCCAGTTGAAGAACCACAAACTACTTCAAAGA
Hz6_114	114	118	A/G	GAGATAAAATTGGATAAAACTTCGTAATTTTAACTTAAAATTGTCAAATAAATTAGAATAAACATGTCAGAAGAACAGA[R}TAAAGTCATGGAAGCGAAGAAGGAGCCATTCTGGGTGTTTGGGTACGGTTCGCTGTGCTGGAACCCAGGGTTTGAGTACCAGC
Hz6_121	121	355	C/T	GTAATTCGGTGTCTGAACGGTTGAATAGAACCATTTTGATGGACTTTCTGGTAGATTTTTTGGTCTCTGTGTTGGCCCC[Y]TTCAGTATACTACGTCCGGGGGTCGCGTATAAGTTGATTGGAGTCACTGGTACAGGGGTTT
Hz6_137	137	38	G/T	CGACCCGAAAACTAAATTGAAAAATCTAAATAATTTTCGAAACTGTAACATAAATTTTGAAACATTTCACAATAAATTGAATAAAA[K]ACTAATTTATAACTTTTTTCTGTCCAATGACAAAAAACAATAAATCGTTGATATTTTCTTCGATAAAATAACA
Hz6_148	148	88	C/T	CTTAAATGTCTCTGTATTGTACTTGAAAAGAACTTGTTTACCTAATTGCATTTTGTCATGTTACT[Y]AGGTTTTTATTAATAGTGTGATTGTTTATAGCCAACTATGAAAAAAGAGGTCTTTGACATGAACGGCGAC
Hz6_154	154	328	A/G	TGTGTTGTTCGCAAGCAGCACCGATCCTTGTGGTCCAAAGATCTATCATATCTTGTTTCTTCAATTTCCT[R}GCTTTAGTTGCATAAACTAGAGCTCTGTGAACATTGCGTACGGCAATAGTATAACAGTTTCTCCGACGACCGAC
Hz6_156	156	163	C/T	CTTGAACACCCTCCTCCTTGTTCTATCATAATTCTCAAACTGGAATATCCTAGCAAAATCTTC[Y]GGAAGATTCTCTTTAGGGTCCCACGGCGACGTTCGGAATGACTCCAACCCTCTGTACCGCATGAAC
Hz6_163	163	972	A/G	AGTAATAGTTCAAACATGTTCAGGAATAAATACTTTTTATATACACAATTTGTAAATAATTTGCTTAGAAGTACAG[R}ATTCTGTGGTGTTCACTAAATTACATATGAACTGTAATTCATAACGAGAGCAGTGTGCTGTGCACGCGAAGACGGCTGTTTT
Hz6_164	164	180	A/C	TATAAGAAAATATTAGAACTAGAAATGGGGCGGAAAATGATACAACAATGTGTTTTAATCACACAATTAATTAGAAAAT[M]TTTTGTGTATAAGAAAATGGTTGTCTCTACACCGAGACATATCAATCTTTATAGTTTCTTGAATGGA
Hz6_168	168	823	C/T	TTACAAAGGAACACCTGTGGTAATAATTACACATAAATACTTTGTTATTTATGTGGCAATTGACTAAGTTATT[Y]TAATTAACGTGATTTATGAAACTAAATTGAATACAAAGAAACAACGAAACAAAAAATAAAGGTCAAGCATATTTAAGTTTT
Hz6_172	172	293	C/T	GGCATAGTCCACGACGCCACCCACCACTGTGCCTATTTGCTGAAGGGTGTTCGTCGCTGTGTT[Y]CCTTGCTGGCCGGTCACAGAGTTGCTGATCAAGTTGGGCAAAATGTTGTTGAAGATTTGGCCCGC
Hz6_190	190	1511	C/G	TATGTGTCATGTTATCATTCTCGTTCTTTATCTTACTCAGTCATTGCCTCTGACTAAATTCACGTCCCTCTTT[S]GATTTACCATCATCATAAACTTAAACAAAAGAGTGCTGAGTTGTGTCATGTAGGACTACA
Hz6_193	193	134	A/C	TCATTTCATAAAGACTTAACAATACATAGTCTGGTATCGATTTGGTGAGTTTTATAAACTATTGCAGAACCCTT[M]ATTAGATTTGGGTTAAAATTATTCCACAAAGGTATCCAACAACCATCAAAACAGTTTAAAATAAATAAATTCTT
Hz6_199	199	337	C/T	GGCCATCTGATCCTATTTCTTGACCTCTACATAGCTCATAAGACAACACTTAAAAAGTACGCAGT[Y]ATCATCAAGTTTATCTAATACTAAAAGCCTAAATACAGCAGCTCCTTTACTAACTTTCGTGG
Hz6_200	200	138	A/G	CTCCTAAGACGATAACATTAGATGTTTTCGTGTACTTTTTTTCGATTGAATCGGATACCGACATCAT[R}AAACACGCAAATTATTTATTTATGATCCGACAAGGGTTGGATTAGACTTCTTTGGTTAAAGTCTATATT
Hz6_213	213	58	A/G	GCGTTTGCCACAAAGAGTCGCAATGACTCCTTGCCGCCTGAAGCACAGGAGAAGGAGGTCCAC[R}ATAAGAAGACAGATGAAAACTCCAGCCAGTGCCAGTCCAATTATCGAGCCACTAGACAAGAGC
Hz6_227	227	127	A/C	AACTTGTAATTTGCGAAGCTGATAGTTGTATATTATCGTCAGTGACGTCATCATGATTGGCGAAT[M]GTTTACAGTTCCCTGCTTCTATATCGCTTTCTAACGTTTTGTGGTCGACTTGCATTAACTTGGCGTAATAC
Hz6_241	241	182	C/T	GCATAATTAAGCGTTCGTGATAAATACAGAAGTTAAATAATTTGTCAAATGTTAATGATTTTGCATGAA[Y]TCCATATTTTAATTACATAATTTCAATTTCATACTTTTTTCGAAATTGTCTTTTATTTAAGCAATGGCAGA
Hz6_250	250	144	C/T	AGGACTTCAAGCTGCAAGCCGACATCATCCTCAAGCGTGCCGAAGGATTCAAGGTGCGCCTCTC[Y]CCGCGCAAACCAACCAAAGCCTGCTAAATAATTACATGATTCCTAAATTTAATTATAATTTCT
Hz6_260	260	1797	C/T	CAGAGCATGAACATCAATAACAATAAAAAATATTAAAAAATAGTCTTCAAGTACAAG[Y]TATACAGTTAAAATTGCATAATAATTTAAACGAATTTTTCAATCTTAGTGAGGTATTCCAGA
Hz6_261	261	1179	C/T	TTATTGCAATAGTCGAATAACATTTCAAACCTGGAATGTTCCGAGTTCTTTATTCAAAATGTT[Y]AAAATCTTGATGGTATTGTTAAAGTTAAATTTTCTGTTTAACCTAGTAGACCATTTTCTCTGGGT
Hz6_276	276	221	C/T	CATTACGCTATTCAATACCACTCTAGTTCTATGAAATAATGTCAGTATAGAAGTTAATTCTCTCG[Y]TCGTAAAAACTTAAACGTACTATATCTGCTACAGTTAGATCGGTCCCAGTAGGAAAGGTAATATAA
Hz6_285	285	403	A/G	GCATTTTATTATGGAATTCAGAGGAGTCAAAAGGGTGTAATTAAATTCATTAAAATCTGTTAAGTAT[R}TTTAAAAATGTATAAGTATGTAATAAGAAAATATCCGTTGTGGTAAATGTTTTAACGGTAGTTAAAGT
Hz6_294	294	193	A/G	CAGTCTTTATAGCTGTTTACATAAAGACATCTTGAGAATGTAACAGATAAAGCTAAGTTAGTTT[R}GTTTTGTGTTATACAACTTAGTTATCTATATTCATATCGCTAATATTTATTAAGTACAGG
Hz6_299	299	230	C/T	CTCTTAAAAATAATACTTAAAGATGACGATGATGGATGACTGTTTTAGAGAACGTGCCG[Y]AACGACCATTATTGCGAAACTGACGCGTTTCGCGGACCTGGCGCCCCGACCCTGACGTGACG
Hz6_304	304	898	A/G	ACCAAATCCATAATAACTACTCTATCGTGAATCCCGACATCTGTAGGGTTAACTTCAATGTGGTAATTGCT[R}CTTACAGTCATGATTTCCACCTTCTTATTAGAAGGTGTGGTGAACGTCATGGTTTCTTGTCTCAGCCTTTC
Hz6_310	310	74	C/G	GAGAACTGGGAACTGGGAAGACGTCCATCATCAAGCGATATGTGCACCAATTCTTCAGCCAGCATTACAGA[S]CAACCATCGGTGTGGACTTCGCGTTGAAAGTATTGAACTGGGACGCGAATACTATCATTCGTTTGCAGCT
Hz6_327	327	949	C/T	AGCGATTTTGAATTATTTTGGACCTTTCTATATTTAATTATTATGCTTGCTCAACTTGACGGTGCCGCAACCACGCACATTT[Y]AATTCTAAGACAATAAGTACTTTAGGATTTATATGGAGTAAATATGATGGATACATTAATATAATTAGATAAGAAT
Hz6_345	345	633	A/C	ACTGGGGAATGATCAATATTATTTTTACAGCAAGTGACTACAGATGGGAGTGTAGAGCACATGTTAGATGA[M]TTCTGTTTAACTTTGAATGATGGTTCTTTAGAGCATAGGCTCACAGAGTTAAACTTGTCAAAACCAGCTGAC
Hz6_346	346	484	C/T	GCTCCATGACTTCCAAGAGAGGCACTCCAATTTCCAAGGCGAAGTTTCCATGGAC[Y]CCAACATTGTCTCTAGCATAGATATGGAAAGGCCTCTGCTGGTTGTTGTTTGAAGCTACTTGACT
Hz6_352	352	1637	G/T	TCTAATATCTATCCCCAAATTAATATCAACCCTTGAAAAAAGCATATTTTTCTATATGTACAGATTTTTT[K]AAATAGTTTTATTTGTGACATCTTTAAATCATATTTTTTCGTTTTACAATGCAGGTTGTTGGTATAGATGT
Hz6_361	361	327	A/G	ACGCTGGCGGATTATGGTACTTATCTTGCAAAAGACAGTGGTCACTTTTCTGTCTACAAAATTGCAACTTT[R}GCAGTGTATGGCAAATATGACAGTCCAGCATCCATTTGTGGTTATCTGCACATTGAGTGCCCATTG
HZ6_386	386	597	A/G	GGGGGATGATGATGATGAGAGAGAGCCGGCAAAGATCCATTCCGTCGCGGCCTCCAATCAGT[R}AAAGACGGCGTTGCCACAGCATTCTCGTCTCTATCCCCTTCGAACATAAAGCAGAAAATCGCAGACATGCAACAAATGC
Hz6_388	388	371	C/T	ATATGGTTTAGAGTTGTGAATATTCGTGTGTTGTTATCATTTCAAAATTATATGAGACGTACTGTTATTTAAA[Y]AAAATAATATTCTTTCAAGGGCCGATTTTTCAATCGTCATATAACTTTTCTGAAGTACTCAGCTGAATCCAGTTAG
Hz6_390	390	549	C/T	GGCGGTAACGAAAAGAATGAGGAACTACTCAGGCATATAAATGGAAGAGGCAAAATTCATTTAGTTCCTTCTAAGAT[Y]GACGACACATACTTCCTTCGATTAGCGATCTGCTCACGTTTCACCGAAGATAGTGACATTCAT
Hz6_393	393	22	C/G	AGTTTCCTTAATGTCTCATTCTATGGGAGCAATAGCCTCGATGCGTTTTGCAACTGTGTTCCCAGACGAC[S]TCGAATTTTTTATTGCAATAGACAGTCTTATTTATGACGATTACGATTTAAACTCAGTAGTGAA
Hz6_406	406	1203	G/T	GGTTTTAACCTCGTACGTCGAATTATCCACACCATTGAAGATCGGTGTTGCTAGGAAAGGAGTTTCAATCCTGGA[K]TTTGGTAAAGGGTAAATCGAGGTAACAACATAAATTCAAGGATCAATTGATGACGTTTTAT
Hz6_408	408	752	C/T	TTCATCCAGCTGACGCTGAAGCAGGAGCAGGAGGAGTACTTGCGCGAGGGCATCGAGTGGGAGCC[Y]GTCGAGTACTTCAACAACATCGTCATCTGTGACCTTATTGAGGCCAGGCATACAGGTA
Hz6_426	426	393	A/G	ACTCACTATTCCTTCACTCTCATAGCGCGATGGGACGACAATCCGACGCCACCAGAGCGAGGTCAGGA[R}AAAATATAGGATTATTATATTTGCTGGTTTTATGCATTGAATAGGGTACGAAACTTGTGAACAAA
Hz6_429	429	401	A/G	ATCAGTTTGTAATACCAAGATAAAAATAAATAATTTCCAATATTCACAAATGGTGCTTTAATA[R}TAATACAGTAGTTTACGATATCAAGGTAAACTTTTCTTGATTTACATACCTACCTTTATATATTACATGAGAGGTC
Hz6_444	444	1527	A/G	CTCTAAACATATCACGGACGACACAATAGATTTATTTTCCATTGAATGATGAATTCATCGCTCGT[R}TGTTTGTAATGTTACTTTACTTTTGTTCCATAATGTTATAGGTACGTCAATATTAAGAATA
Hz6_446	446	340	A/G	TGGCAGCACTAAAAGACGTGTCTCGTCGTTGGCATGTTCCCCCGGCCTTCTCCGTAGAGTTCGTGGGGTATT[R}CCTAGAGAGGAACACGAGAGTGTCCTCCCTCAGGCAGTCTCTCGAACGTCTAACTAAAGAAAACGAGAAGTTGT
Hz6_536	536	525	A/G	AACATAGCACGGTCATTCTTCTCCTTCAAATAAATGTGAGCCATTTTGCTATGAGCCTGGAAGTAATACG[R}CTGGCCAGGTTTTATCTCGTTGAGAAGATCTATTGCATTGTCCACATCACCTTTCTTGAGGGC
Hz6_551	551	447	C/T	GGTTCAAGAAAAGTGTTTGAGAGAGCTGTTGAGTTCTTTGGTGATGAAGATCTTGATGAGAGATTGTT[Y]ATTGCCTTTGCAAAATTTGAAGAAAATCAAAAAGAACATGACAGAGCCAGAGTTATTTACAAATATG
Hz6_559	559	56	C/T	TGGGCAAGCAACCTGAACAAAGGCATCAAGCCCAAATAACGCTAATTTACTAGGAAAAATCTCAGA[Y]AGAAGTATCTTTACATATGATTTGTCAGAATTAGATATTTGCTTTTCTAAATTGCTTAAAACTT
Hz6_580	580	563	C/T	ATTGTTGTAAAAAATGGCAAAAACTTACGATTATTTATTTAAATTACTTTTGATAGG[Y]GATTCCGGAGTGGGAAAAACATCTATTTTATTCAGATTTTCAGAAGATGCTTTCAAC
Hz6_589	589	586	C/T	ATTAGACTGTATGAAGTGATGTTCTCTTGTTTGAACAGTTTCCTCGAGATGGCACGCTGGCA[Y]GTTTCACCGTCGGCAAAGGGTGGGTGAATGATATTGTCAATATCAATGTGTAACAGTAAG
Hz6_620	620	1325	C/G	GTACTACATATTGTGAAATGTGTACATTTGTGATTGATAGTAAAATATTTAGCAGTATTTTATAA[S]TTTATGTCAAATCCTGCGTTGTTGCTTGATGAGAATAATATTTGGCATGTATTATGCTTTCCA
Hz6_667	667	676	A/C	AAGACAATTCACATACAAATCTCAAAGTTATTCCCATTTCTTCCAAACAACTACCACTTATT[M]TTTTATTTGCTTGTTCTAATATCAATCTGGTTTTAATACATCGCCATATTTGAAGGAATAATTTG
Hz6_707	707	749	C/G	CAGTTATGTTAAATTCAGATGTTATGTATTGTCAAAATGTAAAATACAGTTTCAATAGTTT[S]AATTTTAAACAATTCATTCATCATTATGATTATTATATACACATGTCCGTAGTAAAAATAAAT
Hz6_733	733	1067	C/T	ACAATATGTGCAAAGTGCACTCAATAATTTGAAATAAAATCTTGCGGCTATGGAAATGTTTTTGAAGTCTAAAAATATTTTTA[Y]CTTAAAAACGAGAAACCATATTTTAAATGGTTAATTATTCAATTAACTTTCTCCGTGTGATATGAATATAGGAAGT
Hz6_809	809	858	A/G	AGTAATCCTAACATAACTTCAGGAAGACCAAATCCAGTCTTAGGATCCTTAACAGCAATACGATAATGGCAGGC[R}AGAGCAGTCTCTAAACCTCCACCCAAACAGCTGCCCTGGATAGCAGCAATGATAGGTTTGCGTGACTTCT
Hz6_875	875	1387	A/G	CTGGTAACATGGGCTTGGCAAATTGAAAACTATTTGACATTTCAACATTCTCTTGGCATGGTGCAATACTTGGTTTT[R}AAGGAGCTTTTTTGGTATTTGCTGCATTTTTTACTGGGGATGCTACCCTGCTTTTCTTGTTTTTAGGAAGAGCAA
Hz6_954	954	1044	A/G	CTATGTTTTGGTAGATATGATAAAAATTTACATTTTAGTCATAATTTTTACCACTTCACGTACGCCCA[R}TATACCGCCGTCCAAGCAAAGCAGTAATAGTACACACACAGACAACATACTATTTTAT
Hz6_989	989	1083	A/C	GTTCTGACTCCGATTCTGATCGACCAATTCTGTTTGATTACGATGGCAGGAAGC[M]TAACCCAGAACCAGTGGATCCCAACTACAACGCTTATGATGTTTCTGATGACGATAAAGATGAC
Hz6_992	992	178	C/T	GGTGTAATTCCATGAAATCATGAAAATAGTATTTTTCAAAGCACTATAAACAATTTGTCAGCCATTTTGATC[Y]AATTAGTTGTATCGTAACCTTTATAAAAATGTGTAAGTACTTCCATTTTAATAAGATTTTTTCATATGTAGA
Hz6_1004	1004	1118	A/G	CCAATTCTATTTCTTTGCCATGTACAATGAGTTGGAAACTTCTGTCATTTATCTCCTTCCTCCTCACAGGCTT[R}CCATCAATTAATTTTTTATTCTTCTTGTTTTTTGCTTTTGTCTGGTTATTTTTGGGGATTTC
Hz6_1018	1018	948	G/T	TCGTTCACATAATACACAATAGAAAAAACTATTTCAACTACAACTCCGTAAAGAATAAAACATC[K]TACACGCTATTAGCATCATTTGGTTACATAACTTTCAATAAGTAACGTAGTGACAGGCTA
Hz6_1057	1057	1809	C/G	CTCATTTTAACTTGTTAAATTGTGCGACCCCGAATTTGATTTGAGAAATAGGAGGCGCTTCATGTATAT[S]CAAGTGCTCAGACAACAGATTTTTAGCTCGGTCTAACAAAACTACAAATGTTTGGCAAATCAAAATATCAATAATCC
Hz6_1142	1142	1250	C/G	CTGACCTGAATTAGCTTAAGAACTAAAAATGTAAACTATTTGGTTGTGCTATTCTTAGTTAATATTTAGTTTTAAATACTTTTTAC[S]TTTGGGAAATTTAGTGAGATTAATTTGAAATTATATTAAGAAAAACGACGAATTAAGTTGTATTAA
Hz6_1150	1150	1767	A/G	GCAAACACCCAGATCTTTTGATTGTCCGAGGATCATAACTCTGTCAGGATTCTCAACACT[R}AGACTGGCTTGTTCAGCACTATTCTGAGATCTATCTAGAACATTTGGATTAAG
Hz6_1223	1223	501	G/T	ATGTACAATATTTAAAGTAATGTTTACTTACAACAGTACCTATATAAGTTTAATTTACTCCGGCCCAATAC[K]GGGCGGCGCTGTATTTATACACACTTGTATTAATTTCCTAAAATGTAATTAATCGGAAGCGGCGACCGCG
Hz6_1264	1264	1308	G/T	GGAGAAGGATTTCGGCCATACTACATAACGAAGATTGAAGAACTGCAATTGATCGTGGCCGAGAAATC[K]CAAAATCTTCGTCGTCTGCAAGCTCAGCGAAATGAGCTCAACGCTAAAGTTCGTATGTTGCGTGAAGAGCTG
Hz6_1311	1311	1311	C/T	TTCACTGTATCGATTCCACCGCTACCACCTTACTTTTTTGAAAGTGAACTTAACTACAAAAGCTTCTC[Y]GAATCAGTATGATTTTAAATTATTGTTAATGTGTAAGATTGTTTTAGATATTTGAGTAAAT
Hz6_1338	1338	704	A/G	AAGAACTTGACAATGGGAACTTTTGCTTTTGTGATTGCAAATAGCTGTGTGAACTTCCTGTGGTATCGGT[R}CAGCATATTCCTGGCTTGTACGACATGGTTGACAGTGGGGTGGTGCCCCTCAGGCAAGGCCACGT
Hz6_1353	1353	1499	C/T	TTAGTTACTTACCTCCTTTATGAATTGAGTACATTAATGGGAAAGTATTCGACACTTAGTTTAAACAA[Y]AACAACCTCTCGGGTGCCTTGATCTTTAGGTATTTACACAATTACCTAAAATTATTTATTTTATAATCAAATATA
Hz6_1630	1630	1896	A/G	ATGTTCGAGCTACCGCGGCAACGCGTGCACTCCCTCGTCTCCAAGATGATCATCAATGAGGAGCT[R}CTGGCGTCACTTGATGACCCCAGCGAGTGCGCTATCCTACATCGTTCTGAGCCTACCAGAATGCAA
Hz6_1646	1646	1917	C/T	GGCGGCAGAATTGGTTCTCTTTGCTTAATGCTCCTGATACCAGCAACAGTATTCTCTATATTGATTTCTTG[Y]AAAAAGTTTTGCTCTCCCAAATCTCTTTTAGATCTGTCTACATATAAATCTCTTCAAGTATTCTTTAG
Hz6_1764	1764	2054	C/G	TACTCAATATTACATTCAAGCAGACCGATAAGATGTGCATTTTAAGCAAATGACTGTCCTGATATCA[S]TCTTCAACATCCTTAGAAAAATGCATGCATTAATAGTAACATTTACAAAGTGGTAAAATTTTTACGCAT
Hz6_1790	1790	1123	C/T	CCATAGTAAAATGAACGTTTTATTTTTATTTAATTCTCCTAACGTAAGCGATAGAATTTAATATTTTTAAA[Y]TATTCCTTTACACATAGACACGTCAACGTCTAGACATTTTTGTGACAAACCTAATACAACAGTGCAGTATTTAAC

## Sheet: Table S3-Genotypes
Table S3. Genotype data for all loci for all insects from putative populations obtained for Helicoverpa zea population genetics study. Samples were named with two digit year, a letter representing the collection site and a sample serial number. Loci highlighted with yellow were not usedin the study due to either lack of heterozygisity or more than 10% missing data. Numerical codes 1, 2, 3, and 4 …
		1	2	3	4	5	6	7	8	9	10	11	12	13	14	15	16	17	18	19	20	21	22	23	24	25	26	27	28	29	30	31	32	33	34	35	36	37	38	39	40	41	42	43	44	45	46	47	48
		Hz6_0	Hz6_1	Hz6_2	Hz6_5	Hz6_12	Hz6_17	Hz6_18	Hz6_19	Hz6_25	Hz6_38	Hz6_43	Hz6_47	Hz6_50	Hz6_55	Hz6_58	Hz6_65	Hz6_68	Hz6_70	Hz6_73	Hz6_79	Hz6_89	Hz6_91	Hz6_96	Hz6_103	Hz6_104	Hz6_105	Hz6_113	Hz6_114	Hz6_137	Hz6_148	Hz6_154	Hz6_156	Hz6_163	Hz6_164	Hz6_168	Hz6_172	Hz6_190	Hz6_193	Hz6_199	Hz6_200	Hz6_213	Hz6_227	Hz6_241	Hz6_250	Hz6_260	Hz6_261	Hz6_276	Hz6_294
02RS_5943	*	404	303	202	101	304	204	303	204	101	202	303	404	404	101	202	304	202	202	101	101	303	202	203	102	303	303	303	103	303	404	101	204	103	102	404	404	303	102	204	303	101	101	202	202	404	404	204	101
02RS_5944	*	404	103	202	101	404	204	303	204	101	101	303	404	204	103	202	303	202	204	101	101	303	202	202	202	103	303	303	101	303	404	101	404	103	102	404	404	203	202	204	303	101	101	404	202	404	404	204	101
02RS_5945	*	303	103	303	101	404	204	303	204	101	101	303	404	204	103	202	303	202	202	101	103	303	202	203	102	303	303	303	103	303	404	101	202	103	202	404	404	303	202	404	303	101	101	202	202	404	404	204	101
02RS_5946	*	404	303	303	101	304	404	303	204	101	101	303	204	204	103	202	303	202	202	103	103	303	202	203	102	103	303	103	101	304	404	103	202	303	202	404	404	303	202	404	303	101	101	404	202	404	204	204	101
02RS_5947	*	404	103	202	101	304	204	303	204	101	101	303	404	204	101	202	303	202	202	101	101	303	202	303	101	303	303	303	103	303	404	101	204	303	202	204	404	303	202	404	303	303	101	202	202	404	404	204	101
02RS_5948	*	404	103	303	101	404	204	303	204	101	101	303	404	0	103	202	303	202	202	101	101	303	202	203	101	303	303	303	303	304	404	103	202	303	202	204	404	303	202	404	303	101	101	204	202	404	404	204	101
02RS_5949	*	404	303	303	101	304	404	303	404	101	101	303	404	404	101	204	303	101	202	103	101	303	202	203	101	103	303	303	101	304	404	101	202	103	202	204	404	303	202	202	303	101	101	204	202	404	204	204	101
02RS_5950	*	404	303	303	101	304	204	303	204	101	101	303	404	204	103	202	303	202	202	103	101	303	202	202	102	103	303	303	303	303	404	101	404	101	202	204	404	203	202	204	303	303	101	204	202	404	204	204	101
02RS_5951	*	404	103	202	101	404	204	303	204	101	101	303	404	204	303	202	303	202	202	103	101	303	202	203	101	103	303	303	103	303	404	101	202	303	202	404	404	203	202	202	303	303	101	204	202	404	404	204	101
02RS_5952	*	404	101	303	101	304	204	103	204	101	101	303	404	204	303	202	303	202	202	101	0	303	202	203	102	103	303	303	103	303	404	101	404	303	202	204	404	203	202	204	303	303	101	204	202	204	404	204	101
02RS_5953	*	404	103	303	101	304	204	303	204	101	101	303	404	404	103	202	303	202	202	101	303	303	202	202	102	303	303	303	103	303	404	101	204	103	102	404	404	303	202	204	303	101	101	404	202	404	404	204	101
02RS_5954	*	404	303	303	101	303	204	303	204	101	101	303	404	204	101	202	303	202	202	103	103	303	202	203	102	103	303	303	101	303	404	103	202	103	101	404	404	203	202	202	303	303	101	202	202	404	204	204	101
02RS_5955	*	404	103	202	101	303	204	303	204	101	101	303	204	204	101	202	303	202	202	103	101	303	202	203	101	303	303	303	103	303	404	101	404	303	202	204	404	303	202	404	303	303	101	204	202	204	204	404	101
02RS_5957	*	404	303	202	101	304	204	303	204	101	101	303	404	204	101	202	303	202	202	101	103	303	202	203	101	303	303	303	103	303	404	101	404	103	202	204	404	303	202	204	303	101	101	202	202	404	404	204	101
02RS_5958	*	404	303	202	101	304	204	103	204	101	101	303	204	404	103	202	303	202	202	101	303	303	202	202	102	303	303	303	101	303	404	101	202	103	202	404	404	303	102	202	303	303	101	202	202	404	204	204	101
02RS_5959	*	404	103	202	101	404	404	303	202	101	102	303	404	204	103	202	303	202	202	101	101	303	202	202	101	103	303	303	101	304	404	103	202	103	202	404	404	203	202	404	303	303	101	202	202	404	404	0	101
02RS_5960	*	404	303	202	101	404	204	303	204	101	202	303	204	204	103	202	303	102	204	103	103	303	202	203	101	303	303	303	103	304	404	103	202	303	202	404	404	303	202	404	303	101	101	204	202	404	404	204	101
02RS_5961	*	404	101	303	101	404	204	303	204	101	101	303	404	204	103	202	303	202	202	101	101	303	202	202	202	303	303	303	103	303	404	101	202	103	202	204	404	203	202	404	303	101	101	404	202	404	204	204	101
02RS_5962	*	404	103	202	101	304	204	303	204	101	101	303	404	404	101	202	303	102	202	103	101	303	202	203	101	103	303	103	101	303	404	103	202	303	202	404	404	203	202	404	303	303	101	204	202	404	404	204	101
02RS_5963	*	404	101	202	101	404	204	303	204	101	101	303	204	204	103	202	303	202	202	101	101	303	202	203	101	303	303	303	101	304	404	103	0	303	202	404	404	202	202	204	303	303	101	202	202	404	404	204	101
02RS_5964	*	404	101	303	101	303	404	303	204	101	101	303	404	204	103	202	303	102	202	101	303	303	202	202	202	103	303	303	101	303	404	101	202	303	0	404	404	203	202	204	303	303	101	202	202	404	202	204	101
02RS_5965	*	404	303	202	101	404	204	303	204	101	101	303	202	204	303	202	303	202	202	101	103	303	202	202	101	303	303	303	101	304	404	101	204	303	202	0	404	303	202	404	303	303	101	202	202	204	404	204	101
02RS_5966	*	304	303	303	101	304	204	101	202	101	0	303	204	404	101	202	304	202	202	103	303	303	202	202	101	303	303	103	101	303	404	101	202	303	202	204	0	303	202	204	303	303	101	202	204	404	204	204	101
02RS_5967	*	404	101	303	101	404	204	303	204	101	0	303	202	204	103	202	303	202	202	103	101	303	202	203	102	103	303	303	303	303	404	103	404	103	102	202	404	303	202	202	303	303	101	202	202	204	404	204	101
02RS_5968	*	404	303	203	101	404	204	303	204	101	101	303	404	404	103	204	303	202	202	101	103	303	202	202	101	103	303	303	303	303	404	101	0	303	102	404	404	303	202	204	303	103	101	202	202	404	404	204	101
02RS_5969	*	304	103	303	101	304	204	303	204	101	202	303	404	204	103	202	303	202	202	101	103	303	202	203	101	103	303	303	101	303	404	103	202	103	202	404	404	303	202	404	303	303	102	202	202	404	204	204	101
02RS_5970	*	404	303	303	101	304	404	303	204	101	101	303	404	204	103	202	303	102	204	101	101	303	202	203	102	303	303	303	101	303	404	103	202	103	102	404	404	303	202	404	303	303	101	204	202	404	404	204	101
02RS_5971	*	404	103	202	101	304	204	103	204	101	101	303	204	204	101	202	303	202	202	101	101	303	202	202	202	303	303	103	303	303	404	101	202	103	102	204	404	203	202	204	303	303	101	202	202	404	404	204	101
02RS_5972	*	404	103	202	101	304	204	303	204	101	102	303	404	204	103	202	303	102	202	101	101	303	202	203	102	103	303	303	101	0	404	101	202	303	202	404	404	303	202	204	303	303	101	0	202	404	404	204	101
02RS_5973	*	304	303	202	101	404	204	303	204	101	202	303	404	404	101	202	303	202	202	101	101	303	202	202	102	303	303	303	101	303	404	303	202	303	202	204	404	303	202	404	303	303	101	204	0	404	404	204	101
02RS_5974	*	404	303	202	101	304	204	303	204	101	202	303	204	204	101	202	303	202	202	101	101	303	202	202	102	303	303	303	101	303	404	101	204	103	202	404	404	303	202	404	303	101	101	204	202	404	204	204	101
02RS_5975	*	404	303	202	101	303	204	303	204	101	101	303	404	204	303	202	303	202	202	103	101	303	202	203	202	303	303	303	103	303	404	303	204	101	102	404	404	303	202	204	303	101	101	204	202	404	404	204	101
02RS_5976	*	404	101	303	101	404	204	303	204	101	102	303	404	204	103	202	303	202	202	101	103	303	202	202	202	303	303	303	103	304	404	101	204	303	202	202	404	203	202	404	303	303	101	204	202	404	404	204	101
02RS_5977	*	404	103	202	101	404	404	303	204	101	101	303	404	204	101	202	303	202	204	101	101	303	202	203	102	303	303	303	101	304	404	103	202	303	102	204	404	203	202	204	303	101	101	204	202	204	404	204	101
02RS_5978	*	404	103	202	101	304	204	303	204	101	101	303	404	204	101	202	303	202	202	103	0	303	202	202	101	303	303	303	101	303	404	101	202	303	202	404	404	202	202	404	303	101	101	404	202	404	204	204	101
02RS_5979	*	404	303	303	101	304	404	303	204	101	101	303	404	204	101	202	303	202	204	101	101	303	202	203	102	303	303	303	101	303	404	101	202	303	102	404	404	303	202	404	303	303	101	202	202	404	404	204	101
02RS_5980	*	404	103	202	101	304	204	303	204	101	101	303	404	0	303	202	303	102	204	103	103	303	202	203	202	303	303	103	101	304	404	101	204	303	202	204	404	303	202	202	0	303	101	204	202	404	404	204	101
02RS_5981	*	404	103	202	101	304	204	303	204	101	101	303	404	204	103	204	303	202	202	103	103	303	202	203	101	103	303	303	103	304	404	101	202	303	101	204	404	203	202	202	303	303	101	204	202	404	202	204	101
02RS_5982	*	404	103	202	101	404	204	303	204	101	101	303	404	204	103	202	303	102	202	101	101	303	202	202	101	303	303	303	101	404	404	303	404	303	202	404	404	202	202	204	303	303	102	204	202	404	204	204	101
02RS_5983	*	404	103	303	101	404	204	103	204	101	101	303	404	204	101	202	303	202	202	101	101	303	202	202	202	103	303	103	103	303	404	103	204	303	0	404	404	303	202	204	303	303	101	202	202	404	404	204	101
02RS_5984	*	303	303	303	101	304	204	103	204	101	101	303	204	204	101	202	303	202	202	101	303	303	202	202	202	303	303	303	101	404	404	303	202	101	102	404	404	303	102	204	303	303	101	404	202	404	404	204	101
02RS_5985	*	404	103	202	101	404	204	303	204	101	101	303	404	204	101	202	303	202	202	101	103	303	202	202	102	103	303	303	101	303	404	103	202	101	102	204	404	202	202	202	303	303	101	404	202	404	404	204	101
02RS_5986	*	404	303	303	101	404	0	303	202	101	101	303	204	202	103	202	303	202	202	101	103	303	202	203	202	103	303	303	101	303	404	101	202	103	102	404	404	203	202	202	303	303	101	404	202	404	404	404	101
02RS_5987	*	404	103	303	101	304	204	303	204	101	101	0	404	202	101	202	304	202	202	103	101	303	202	202	102	303	303	103	103	303	404	101	202	103	202	404	404	202	202	404	303	101	101	202	202	404	404	204	101
02RS_5988	*	404	103	202	101	404	202	303	202	101	0	303	404	202	101	202	303	202	202	101	303	303	0	203	101	103	303	303	103	303	404	103	204	303	102	404	404	202	202	204	303	303	101	0	202	404	204	202	101
02RS_5989	*	404	103	202	101	404	204	303	204	101	101	303	204	204	103	204	303	202	202	101	101	303	202	202	102	103	303	303	103	304	404	103	404	303	101	204	404	303	202	204	303	303	101	404	202	204	404	204	101
02RS_5990	*	404	101	303	101	404	204	303	204	101	101	303	204	204	103	202	303	202	202	103	101	303	202	202	101	103	303	303	101	303	404	101	404	101	102	404	404	203	202	204	303	303	101	202	202	404	204	204	101
02RS_5991	*	404	103	202	101	404	204	303	204	101	101	303	202	204	103	202	303	102	202	101	303	303	202	203	101	303	303	303	101	303	404	103	404	303	202	204	404	303	202	404	303	101	101	204	202	404	404	204	101
02RS_5992	*	404	101	303	101	304	204	303	204	101	101	303	404	404	303	204	304	202	202	101	303	303	202	202	101	103	303	303	101	303	404	103	404	101	202	404	404	303	202	404	303	303	101	404	202	204	404	204	101
02RS_5993	*	404	103	303	101	404	204	103	204	101	101	303	404	204	101	202	303	202	202	101	103	303	202	203	202	303	303	303	101	404	404	103	202	303	202	204	0	303	202	202	303	303	101	202	202	404	204	204	101
02RS_5994	*	304	303	303	101	404	404	303	204	101	101	303	204	202	103	202	303	202	202	101	101	303	202	203	101	101	303	303	103	303	404	101	204	303	202	204	404	303	202	204	303	101	101	204	202	404	204	204	101
02RS_5995	*	404	103	303	101	404	204	303	204	101	102	303	404	202	103	202	303	102	202	101	101	303	202	202	102	101	303	303	101	304	404	103	202	303	101	204	404	203	202	204	303	303	101	204	202	404	404	204	101
02RS_5996	*	404	101	202	101	404	204	303	204	101	101	303	202	0	303	202	303	202	202	103	103	303	202	202	102	103	303	303	101	304	404	103	202	103	102	204	404	203	202	204	303	303	101	204	202	404	404	204	101
02RS_5997	*	404	103	202	101	304	204	303	204	101	202	303	404	204	103	202	303	202	204	103	303	303	202	202	101	303	303	303	101	304	404	103	204	303	202	404	404	203	202	204	303	303	101	202	202	404	404	204	101
02RS_5998	*	404	303	202	101	303	0	103	204	101	101	303	404	204	303	202	303	202	202	103	101	303	202	203	102	303	303	0	103	303	404	101	202	103	202	202	404	203	202	404	303	101	101	404	202	404	204	204	101
02RS_5999	*	404	303	303	101	304	204	303	204	101	101	303	204	204	101	202	303	102	204	101	303	303	202	202	101	101	303	303	103	303	404	101	202	103	101	204	404	303	202	404	303	101	101	204	202	404	404	204	101
02RS_6000	*	404	303	303	101	404	204	303	204	101	101	303	404	204	103	202	303	202	202	101	101	303	202	202	101	303	303	303	101	303	404	103	204	303	202	404	404	303	202	202	303	303	101	202	202	404	404	204	101
02RS_6001	*	404	103	303	101	404	204	303	404	101	101	303	202	204	303	202	303	202	204	101	101	303	202	202	102	103	303	303	101	304	404	103	202	303	202	404	404	303	202	204	303	303	101	202	202	404	404	204	101
02RS_6002	*	404	103	303	101	304	204	303	204	101	102	303	404	202	103	202	303	101	202	101	303	303	202	202	102	303	303	303	101	303	404	103	204	101	202	204	404	303	202	204	303	303	101	204	202	404	404	204	101
02RS_6003	*	404	103	202	101	404	204	303	204	101	202	303	204	404	103	202	304	202	202	103	101	303	202	203	101	303	303	303	103	303	404	101	202	103	202	404	404	303	202	204	303	303	101	202	404	404	404	204	101
02RS_6004	*	404	303	202	101	404	204	303	204	101	101	0	202	204	303	202	303	202	202	101	101	303	202	202	102	103	303	303	101	303	404	103	202	303	202	404	404	203	202	404	303	303	101	204	202	204	404	204	101
02RS_6005	*	404	303	303	101	404	204	303	204	101	101	303	202	204	103	202	303	202	202	103	101	303	202	303	102	303	303	303	103	304	404	101	202	101	202	404	404	303	202	404	303	101	101	202	202	404	404	204	101
02RS_6006	*	304	0	303	101	404	204	303	202	101	102	303	204	204	103	202	303	202	202	101	103	303	202	203	102	103	303	303	101	303	404	101	204	303	102	404	404	203	202	404	303	101	101	204	202	404	204	204	101
02RS_6007	*	404	103	202	101	304	404	303	204	101	101	303	404	204	103	202	303	102	202	101	103	303	202	202	102	103	303	303	103	303	404	101	202	303	202	404	404	303	202	204	303	303	101	404	202	404	404	204	101
02RS_6008	*	404	103	202	101	303	204	303	204	101	102	303	404	404	101	204	304	202	202	101	101	303	202	303	101	103	0	303	101	303	404	101	0	303	102	404	404	203	202	204	303	101	101	404	202	404	202	204	101
02RS_6009	*	404	303	202	101	304	204	303	204	101	101	303	404	204	303	202	303	202	404	101	101	303	202	303	102	303	303	303	101	303	404	101	204	103	202	204	404	203	202	202	303	303	101	204	202	404	404	204	101
02RS_6010	*	404	103	202	101	404	204	303	204	101	101	303	204	204	103	202	303	102	202	103	101	303	202	203	202	103	303	303	103	303	404	101	202	303	202	204	404	303	202	404	303	303	101	404	202	404	404	204	101
02RS_6012	*	304	0	303	101	404	204	303	204	101	101	303	404	204	101	202	303	202	202	101	303	303	202	203	102	303	303	303	101	303	404	303	404	103	202	404	404	203	202	202	303	101	101	204	202	404	0	204	101
02RS_6013	*	404	103	303	101	404	404	103	204	101	101	303	404	204	101	202	303	202	202	101	103	303	202	202	102	303	303	303	303	303	404	103	204	103	202	404	404	303	202	404	303	303	101	204	202	404	404	404	101
02RS_6014	*	404	303	303	101	404	404	303	204	101	102	303	404	204	103	202	303	102	202	103	101	303	202	202	102	103	303	303	103	303	404	103	202	103	102	204	404	203	202	204	303	303	101	202	202	404	404	204	101
02RS_6015	*	0	103	303	101	304	404	303	204	101	202	303	404	204	101	202	303	202	202	101	101	303	202	203	101	303	303	303	103	304	404	103	202	103	102	404	404	303	202	204	303	303	101	202	202	404	404	204	101
02RS_6016	*	404	303	303	101	304	204	303	204	101	101	303	202	204	303	202	303	102	202	101	101	303	202	202	102	303	303	303	101	304	404	303	204	303	202	204	404	303	202	204	303	303	101	204	202	404	204	204	101
02RS_6017	*	404	303	202	101	404	204	303	204	101	101	303	202	404	103	202	304	202	202	103	101	303	202	203	102	303	303	303	103	303	404	101	202	103	202	204	404	303	202	202	303	303	101	204	202	404	204	404	101
02RS_6018	*	404	103	202	101	304	204	303	204	101	102	303	404	404	101	202	304	202	202	101	101	303	202	202	102	303	303	303	101	303	404	101	204	303	202	404	404	303	202	404	303	303	101	202	202	404	404	204	101
02RS_6019	*	304	303	202	101	404	204	303	204	101	101	303	404	404	303	204	303	202	202	101	103	303	202	202	202	303	303	303	103	303	404	101	202	103	202	204	404	203	202	204	303	303	101	202	202	404	404	204	101
02RS_6020	*	404	103	202	101	404	204	303	204	101	101	303	204	404	103	202	303	202	204	101	101	303	202	202	102	103	303	303	101	303	404	101	202	103	202	204	404	303	202	404	303	101	101	202	204	204	404	204	101
02RS_6021	*	304	103	0	101	404	404	303	404	101	202	303	404	204	101	202	303	202	204	103	101	303	202	203	102	303	303	303	103	303	404	103	204	303	102	202	404	303	202	404	303	303	101	204	202	404	204	204	101
02RS_6022	*	304	103	303	101	404	204	303	204	101	102	303	404	204	101	204	304	202	204	103	303	303	202	203	102	101	303	303	103	303	404	101	404	303	202	202	404	303	202	202	303	101	101	204	202	404	404	204	101
02RS_6023	*	404	103	303	101	304	404	303	204	101	101	303	204	404	103	202	303	202	202	101	103	303	202	303	101	303	303	303	101	303	404	303	0	303	202	404	404	303	202	202	303	101	101	202	202	404	204	204	101
02RS_6024	*	303	101	202	101	404	204	303	204	101	101	303	204	204	303	202	404	202	202	101	101	303	202	203	102	103	303	303	101	303	404	103	202	103	202	404	404	203	202	202	303	303	101	404	202	404	204	204	101
02RS_6025	*	404	103	303	101	404	204	303	204	101	101	303	204	204	101	202	303	202	202	101	103	303	202	203	101	303	303	303	101	303	404	101	204	103	202	204	404	303	202	204	303	101	101	202	202	404	204	204	101
02RS_6026	*	303	101	202	101	404	404	303	204	101	101	303	404	204	101	202	303	202	202	101	101	303	202	203	101	303	303	103	101	304	404	101	202	103	202	204	404	303	202	204	303	303	101	202	202	404	204	204	101
02RS_6027	*	404	101	202	101	404	204	303	204	101	101	303	404	204	101	202	303	202	202	103	101	303	202	203	202	303	303	303	101	304	404	103	204	103	202	404	404	303	202	204	303	101	101	204	202	204	404	204	101
02RS_6028	*	404	303	303	101	303	204	303	204	101	102	303	202	404	103	202	303	102	202	101	101	303	202	202	202	303	303	303	101	304	404	101	204	103	202	404	404	303	202	204	303	303	101	204	202	404	404	204	101
02RS_6029	*	404	303	202	101	404	204	103	204	101	101	303	204	404	101	202	303	202	204	101	101	303	202	303	102	303	303	303	101	303	404	101	202	303	202	404	404	303	202	204	303	101	101	202	202	404	404	204	101
02RS_6030	*	404	101	202	101	404	404	303	204	101	102	303	204	204	101	202	303	202	202	103	0	303	202	202	102	303	303	103	103	303	404	103	202	303	202	204	404	203	202	404	303	303	101	202	202	404	404	204	101
02RS_6031	*	404	103	202	101	404	404	303	204	101	102	303	404	204	101	202	304	202	202	101	101	303	202	203	102	303	303	303	103	304	404	103	204	101	202	204	404	203	202	204	303	303	101	204	202	404	204	204	101
02RS_6032	*	304	303	303	101	304	204	303	204	101	202	303	204	0	303	202	303	202	202	101	103	303	202	202	101	103	303	303	103	303	404	101	202	103	202	202	404	303	202	202	303	303	101	202	202	404	204	204	101
02RS_6033	*	404	101	202	101	304	204	303	204	101	102	303	404	204	101	204	303	202	202	103	103	303	202	202	202	303	303	303	103	303	404	101	204	303	202	404	404	303	202	204	303	303	101	204	202	404	204	204	101
02RS_6034	*	404	103	303	101	304	204	303	204	101	102	303	204	204	103	202	303	202	202	103	101	303	202	202	202	303	303	303	103	304	404	101	204	303	102	404	404	203	202	204	303	303	101	202	202	404	404	204	101
02RS_6035	*	404	103	202	101	304	204	303	204	101	101	303	404	204	103	202	303	202	202	101	103	303	202	203	101	303	303	103	103	303	404	101	204	103	202	204	404	303	202	202	303	303	101	202	204	404	404	204	101
02RS_6036	*	404	101	202	101	304	204	303	204	101	101	303	204	204	101	202	303	202	202	101	0	303	202	202	101	103	303	303	103	303	404	103	202	103	202	204	404	203	202	202	303	101	101	204	202	204	404	204	101
02RS_6037	*	404	303	303	101	304	204	303	204	101	101	303	204	404	103	202	303	202	202	101	303	303	202	203	102	303	303	303	103	303	404	101	202	303	102	404	404	203	202	204	303	303	101	204	202	404	404	204	101
02RS_6038	*	404	303	303	101	404	204	303	204	101	101	303	204	204	101	202	303	202	204	103	103	303	202	202	102	303	303	303	101	303	404	103	404	303	202	404	404	303	202	404	303	303	101	204	202	404	404	204	101
02RS_6039	*	404	103	202	102	404	404	303	204	101	202	303	404	204	103	202	303	202	202	103	101	303	202	203	102	103	303	103	303	303	404	103	202	303	202	204	404	203	202	202	303	303	102	202	204	204	202	204	103
02RS_6041	*	404	103	202	102	304	404	303	204	101	102	303	204	202	103	202	303	202	202	101	101	303	202	202	102	103	303	103	101	303	404	103	202	303	202	404	404	303	102	204	303	303	102	404	204	404	404	204	103
02RS_6042	*	404	103	202	102	304	204	303	204	101	101	303	204	204	303	202	303	202	202	101	303	303	202	203	102	103	303	103	303	303	404	101	202	103	202	404	404	303	102	204	303	303	102	204	204	204	404	204	103
02RS_6043	*	404	103	203	102	304	204	303	204	101	0	303	404	204	103	202	303	202	202	101	101	303	202	203	102	303	303	103	103	304	404	103	202	303	202	204	404	203	202	204	303	303	102	202	204	404	204	204	103
02RS_6044	*	404	103	203	102	404	404	303	204	101	0	303	204	204	101	202	303	202	202	103	103	303	202	203	101	103	303	103	101	303	404	103	404	103	202	404	404	203	202	404	303	303	102	202	204	404	404	204	103
02RS_6045	*	404	103	202	102	404	204	303	204	101	101	303	404	204	101	202	303	202	202	101	103	303	202	203	102	303	303	103	303	304	404	101	202	303	102	202	404	303	202	204	303	103	102	404	204	404	204	204	103
02RS_6046	*	404	103	303	102	304	404	303	204	101	101	303	204	202	101	202	303	102	202	101	101	303	202	202	101	101	303	103	101	303	404	101	202	103	202	404	404	203	101	204	303	103	102	204	204	204	204	204	103
02RS_6047	*	404	103	202	102	303	204	303	204	101	101	303	204	404	103	202	303	202	202	101	101	303	202	202	102	103	303	103	303	303	404	103	202	103	202	404	404	202	202	404	303	303	102	202	204	404	204	204	103
02RS_6048	*	404	103	203	102	404	204	303	204	101	101	303	204	204	303	202	303	202	202	103	101	303	202	202	101	303	303	103	103	303	404	101	202	303	202	204	404	303	202	202	303	303	102	404	204	404	404	204	103
02RS_6049	*	404	103	202	102	304	404	303	204	101	101	303	404	204	101	202	303	202	202	101	103	303	202	203	102	303	303	101	101	304	404	101	404	103	202	204	404	303	202	204	303	103	102	202	204	404	404	204	103
02RS_6050	*	404	101	202	102	404	404	303	204	101	101	303	204	404	103	202	303	102	202	101	101	303	202	202	102	303	303	103	103	303	404	103	202	103	202	404	404	203	202	204	303	303	102	202	204	404	404	204	103
02RS_6051	*	404	101	203	102	304	204	303	204	101	101	303	404	404	101	202	303	202	202	101	303	303	202	202	202	303	303	103	101	303	404	103	202	303	202	404	404	303	202	204	303	303	102	202	204	404	204	204	103
02RS_6052	*	404	103	202	102	404	204	103	204	101	101	303	404	204	101	202	304	101	202	101	101	303	202	203	101	303	303	103	101	404	404	103	202	303	202	404	404	303	202	204	303	303	102	204	204	404	404	204	103
02RS_6053	*	404	103	202	202	304	404	303	204	101	101	303	404	404	103	202	303	202	202	101	103	303	202	202	102	103	303	103	103	303	404	101	202	303	102	404	404	203	202	204	303	303	102	204	204	404	204	204	101
02RS_6054	*	404	103	202	102	304	204	303	204	101	101	303	204	404	101	202	303	202	202	101	101	303	202	202	101	303	303	103	101	303	404	103	204	103	202	404	404	303	202	404	303	103	102	404	204	204	404	204	103
02RS_6055	*	404	103	203	102	304	204	303	204	101	101	303	204	404	103	202	303	202	202	103	101	303	202	203	101	103	303	103	103	303	404	101	202	103	102	404	404	203	202	202	303	303	102	202	204	404	202	204	103
02RS_6056	*	404	103	202	102	404	204	303	204	101	101	303	204	202	103	202	303	202	202	101	103	303	202	203	102	303	303	103	101	303	404	101	202	303	102	404	404	303	202	204	303	303	102	202	204	404	204	204	103
02RS_6057	*	404	101	202	102	304	404	303	204	101	202	303	404	202	101	202	303	202	204	101	101	303	202	202	101	303	303	103	101	304	404	101	202	103	102	404	404	303	202	204	303	303	102	404	204	404	404	204	103
02RS_6058	*	404	103	202	102	404	204	303	204	101	0	303	204	204	101	202	303	202	204	103	101	303	202	202	102	303	303	103	101	303	404	103	404	101	202	204	404	303	202	202	303	103	102	404	204	404	404	204	103
02RS_6059	*	404	103	202	102	404	204	303	204	101	101	303	404	204	103	202	304	102	202	101	303	303	202	202	101	303	303	103	103	303	404	103	202	303	202	404	404	303	202	202	303	303	102	202	204	404	404	204	103
02RS_6060	*	404	103	303	102	304	204	303	204	101	101	303	404	204	101	204	303	102	202	101	303	303	202	203	101	303	303	103	101	303	404	101	202	103	202	204	404	303	202	404	303	303	102	404	204	404	204	204	103
02RS_6061	*	404	103	202	102	304	204	303	204	101	101	303	204	204	101	202	303	102	202	101	101	303	202	203	101	303	303	103	303	303	404	103	202	303	202	204	404	303	202	204	303	303	102	204	204	404	204	204	103
02RS_6062	*	404	0	202	101	304	204	103	204	101	101	303	404	204	101	202	303	102	202	103	101	303	0	202	101	303	303	303	303	303	404	103	204	303	102	404	0	203	202	404	303	303	101	202	204	404	404	0	101
02RS_6063	*	404	103	202	102	304	204	303	204	101	202	303	404	204	103	202	303	202	202	101	303	303	202	202	202	303	303	103	303	303	404	101	404	303	102	404	404	203	202	404	303	303	102	204	404	404	404	204	103
02RS_6064	*	404	0	202	101	304	202	303	202	101	202	303	404	404	103	202	303	202	202	101	101	303	0	303	202	303	303	303	103	303	404	101	202	103	202	404	404	303	202	202	303	303	101	202	202	404	404	202	101
02RS_6065	*	404	103	202	102	404	404	303	204	101	102	303	204	204	101	202	303	202	202	101	101	303	202	203	101	303	303	103	103	303	404	101	202	103	202	204	404	303	202	204	303	303	102	202	204	404	204	204	103
02RS_6066	*	404	103	202	102	404	404	303	204	101	102	303	404	204	101	202	303	202	202	303	101	303	202	202	202	303	303	103	101	303	404	101	202	103	202	204	404	303	202	202	303	303	102	204	204	404	404	204	103
02RS_6067	*	304	103	202	102	304	204	303	204	101	101	303	404	404	101	202	303	202	202	101	101	303	202	203	101	103	303	103	101	303	404	103	202	103	202	204	404	303	202	404	303	303	102	204	204	404	204	204	103
02RS_6068	*	404	101	203	102	404	204	103	204	101	101	303	404	204	103	202	303	102	202	103	101	303	202	202	102	303	303	103	103	303	404	101	204	303	102	204	404	203	202	204	303	303	102	202	204	404	204	204	103
02RS_6069	*	404	103	202	102	304	204	303	204	101	102	303	404	204	103	202	303	202	202	101	101	303	202	202	101	303	303	101	101	404	404	103	202	303	102	204	404	303	202	404	303	303	102	202	204	404	404	204	103
02RS_6070	*	404	103	202	102	404	404	303	204	101	202	303	204	202	101	202	303	202	202	101	0	303	202	203	102	303	303	103	103	303	404	103	202	103	102	204	404	303	202	204	303	303	102	202	204	404	404	404	103
02RS_6071	*	404	103	202	102	304	204	303	204	101	101	303	404	204	103	202	303	202	202	101	103	303	202	203	102	303	303	103	103	303	404	103	202	303	202	204	404	303	202	202	303	303	102	204	204	404	404	204	103
02RS_6072	*	404	103	202	102	304	404	303	204	101	102	303	404	204	103	202	304	202	202	101	103	303	202	203	101	303	303	103	303	303	404	103	204	303	202	204	404	303	202	404	303	103	102	202	404	404	404	204	103
02RS_6073	*	404	103	202	102	404	404	103	204	101	101	303	204	204	103	202	303	202	202	101	103	303	202	203	102	303	303	103	103	303	404	303	202	103	102	404	404	303	202	202	303	303	102	204	204	404	204	204	103
02RS_6074	*	404	103	203	102	304	204	303	204	101	101	303	204	404	103	202	303	102	202	103	101	303	202	202	102	103	303	103	303	304	404	103	202	303	202	404	404	303	202	204	303	303	102	204	204	204	204	204	103
02RS_6075	*	404	103	202	102	404	0	303	204	101	101	303	404	404	101	202	303	202	202	103	0	303	202	202	101	303	303	103	303	304	404	103	204	103	101	404	404	202	202	404	303	103	102	204	404	404	404	204	103
02RS_6076	*	404	103	203	102	404	204	303	204	101	101	303	204	404	303	202	303	102	204	101	101	303	202	202	102	103	303	103	101	303	404	101	202	303	102	404	404	303	202	204	303	303	102	0	204	404	404	204	103
02RS_6077	*	404	103	203	102	304	204	303	204	101	101	303	204	404	101	202	303	101	202	101	303	303	202	202	102	103	303	103	303	303	404	103	204	303	102	204	404	203	202	204	303	303	102	202	204	404	404	204	103
02RS_6078	*	404	103	203	102	304	204	103	204	101	202	303	204	204	103	202	304	202	202	103	103	303	202	202	102	103	303	103	103	303	404	303	202	103	0	404	404	303	202	204	303	101	102	202	204	404	404	204	103
02RS_6079	*	304	103	203	102	404	204	303	204	101	102	303	404	202	101	202	303	202	202	103	101	303	202	203	102	303	303	103	101	303	404	101	202	303	101	404	404	203	102	204	303	303	102	202	204	404	404	204	103
02RS_6080	*	404	103	303	102	304	204	303	204	101	101	303	404	202	103	202	303	202	204	101	101	303	202	203	102	103	303	103	103	303	404	103	202	103	202	404	404	303	202	404	303	303	102	204	204	404	404	204	103
02RS_6081	*	404	103	202	102	304	404	103	204	101	0	303	404	202	101	202	304	202	202	103	303	303	202	202	101	103	303	103	103	304	404	101	204	103	202	204	404	303	202	202	303	303	102	404	204	404	204	204	103
02RS_6082	*	404	103	303	102	404	204	303	204	101	101	303	204	204	101	202	303	101	202	103	303	303	202	203	101	103	303	103	103	303	404	101	202	101	202	404	404	303	202	204	303	303	102	204	204	404	404	204	103
02RS_6083	*	404	103	202	102	404	204	303	204	101	102	303	404	204	101	202	303	202	202	101	101	303	202	203	101	303	303	103	303	303	404	101	404	303	202	404	0	303	202	404	303	103	102	202	204	204	204	404	103
02RS_6084	*	404	103	203	102	404	204	303	204	101	101	303	404	204	103	202	303	202	202	103	303	303	202	203	101	303	303	103	101	404	404	303	202	303	101	202	404	202	202	202	303	303	102	202	204	404	404	204	103
02RS_6085	*	404	103	202	102	404	204	303	204	101	202	303	404	202	103	202	303	202	202	101	101	303	202	203	101	303	303	103	101	303	404	103	202	103	102	204	404	202	202	204	303	303	102	404	204	404	404	204	103
02RS_6086	*	404	103	202	101	404	204	303	204	101	101	303	404	202	103	202	303	202	204	101	103	303	202	203	101	103	303	103	101	304	404	103	202	303	202	204	404	303	202	202	303	103	101	202	404	404	404	204	101
02RS_6087	*	404	103	303	102	404	204	303	204	101	101	303	204	202	103	202	303	202	202	101	101	303	202	203	102	303	303	103	103	304	404	103	404	303	102	404	404	303	202	204	303	103	102	202	204	404	404	204	103
02RS_6088	*	404	103	202	102	404	204	103	204	101	102	303	204	202	101	202	304	202	202	101	101	303	202	203	202	103	303	103	103	303	404	101	202	303	102	404	404	303	202	204	303	303	102	404	204	204	404	204	103
02RS_6089	*	404	103	202	102	404	204	303	204	101	101	303	204	204	103	202	304	202	202	101	103	303	202	202	202	303	303	103	103	303	404	303	204	103	202	204	404	203	202	404	303	103	102	202	204	404	204	204	103
02RS_6090	*	404	101	203	102	404	204	303	204	101	101	303	404	404	303	202	303	202	202	101	103	303	202	202	202	103	303	103	103	404	404	103	204	103	102	404	404	303	202	204	303	303	102	204	204	404	404	204	103
02RS_6091	*	404	103	203	102	303	204	303	204	101	101	303	404	204	103	202	304	202	202	103	103	303	202	202	102	103	303	103	103	304	404	101	204	103	202	404	404	303	102	204	303	103	102	202	404	404	404	204	103
02RS_6092	*	404	103	203	0	304	204	103	204	101	102	303	204	404	101	202	303	202	204	101	103	303	202	202	102	103	303	103	101	304	404	101	202	103	202	204	404	203	202	204	303	303	0	204	204	404	204	204	101
02RS_6093	*	404	101	202	102	304	204	303	204	101	0	303	404	202	103	202	303	202	204	103	0	303	202	202	101	303	303	103	103	303	404	101	204	101	202	404	404	303	202	404	303	303	202	204	204	404	404	204	103
02RS_6094	*	404	103	303	102	404	204	303	404	101	101	303	404	202	103	202	303	202	204	101	303	303	202	202	202	103	303	103	103	304	404	103	202	303	102	204	404	303	202	204	303	101	102	404	404	404	404	204	103
02RS_6095	*	404	103	303	102	304	404	303	204	101	101	303	404	204	103	202	303	202	204	101	101	303	202	203	102	303	303	103	101	303	404	101	204	103	202	404	404	303	202	204	303	103	102	202	204	404	202	204	103
02RS_6096	*	404	101	202	102	404	204	303	204	101	101	303	204	404	103	202	303	202	202	101	303	303	202	303	101	303	303	103	303	304	404	303	202	103	202	204	404	303	202	204	303	103	102	204	204	404	202	204	103
02RS_6098	*	404	103	303	102	404	204	303	204	101	101	303	204	204	103	202	303	202	202	103	101	303	202	203	102	303	303	101	101	303	404	103	202	103	202	404	404	303	202	204	303	303	102	202	204	404	404	204	103
02RS_6099	*	404	103	202	102	404	204	303	204	101	202	303	404	204	103	202	304	202	202	101	101	303	202	202	102	303	303	103	303	303	404	103	202	101	202	204	404	203	202	204	303	303	102	204	204	404	404	204	103
02RS_6101	*	404	103	203	102	304	204	303	204	101	101	303	404	204	101	202	303	202	202	103	101	303	202	203	101	303	303	103	303	303	404	101	204	103	102	202	404	203	202	404	303	303	102	404	204	404	202	204	103
02RS_6102	*	404	103	202	102	304	404	303	204	101	101	303	404	204	103	202	303	102	202	101	0	303	202	202	102	303	303	103	303	304	404	101	202	103	202	404	404	203	202	0	303	303	102	204	204	404	404	204	103
02RS_6103	*	404	101	202	102	304	204	303	204	101	101	303	404	204	101	202	303	202	204	101	0	303	202	202	101	303	303	103	101	304	404	103	202	303	202	404	404	303	202	404	303	103	102	202	204	404	404	204	103
02RS_6104	*	404	101	202	102	404	404	303	204	101	102	303	404	204	103	204	304	202	404	103	101	303	202	203	202	303	303	103	103	404	404	103	202	103	101	404	404	203	202	202	303	303	202	202	204	404	404	204	103
02RS_6105	*	404	101	202	102	304	204	303	204	101	102	303	404	202	101	202	303	202	202	101	101	303	202	203	101	303	303	103	103	303	404	103	202	303	202	404	404	202	202	204	303	303	102	202	204	404	202	204	103
02RS_6106	*	404	103	203	102	304	204	303	204	101	202	303	404	204	101	202	303	202	202	101	103	303	202	203	101	303	303	103	101	303	404	101	202	101	202	404	404	303	102	404	303	303	102	404	404	404	204	204	103
02RS_6107	*	404	103	203	102	404	204	103	204	101	202	303	404	202	103	202	303	202	204	101	101	303	202	303	102	303	303	103	101	303	404	101	0	303	202	404	404	303	202	404	303	303	102	202	204	404	204	204	103
02RS_6108	*	404	103	202	102	304	404	303	404	101	101	303	204	202	103	202	303	202	202	103	101	303	202	203	101	303	303	103	303	304	404	101	404	303	102	404	404	303	202	404	303	303	102	202	204	404	204	204	103
02RS_6109	*	404	103	202	102	404	204	303	204	101	101	303	404	202	303	202	303	202	202	101	303	303	202	202	101	103	303	103	303	303	404	103	202	103	202	404	404	203	202	204	303	303	102	202	404	204	204	204	103
02RS_6110	*	404	103	202	102	404	204	303	204	101	101	303	204	204	103	202	303	202	202	103	101	303	202	303	102	303	303	103	303	303	404	103	202	303	0	404	404	303	202	204	303	103	102	404	204	404	404	204	103
02RS_6111	*	404	103	202	102	404	404	303	204	101	101	303	204	202	103	202	303	202	202	103	101	303	202	203	102	303	303	103	101	303	404	101	204	101	101	404	404	203	102	404	303	303	102	204	204	404	404	204	103
02RS_6113	*	404	103	203	102	304	204	103	204	101	101	303	404	204	101	202	303	202	202	101	101	303	202	202	202	303	303	103	103	303	404	303	404	103	102	404	404	303	202	404	0	103	102	204	0	404	404	204	103
02RS_6114	*	404	103	203	102	404	404	303	204	101	0	303	404	204	103	202	303	202	204	101	303	303	202	203	202	303	303	103	103	303	404	101	202	103	202	404	404	203	202	204	303	103	102	202	204	404	404	204	103
02RS_6115	*	304	103	202	102	304	404	303	204	101	102	303	404	204	101	202	303	202	202	101	0	303	202	202	101	303	303	103	103	303	404	101	202	103	101	404	404	303	202	204	303	303	102	202	204	404	204	204	103
02RS_6117	*	404	103	203	102	304	204	303	204	101	101	303	404	404	101	202	303	102	202	101	103	303	202	203	102	103	303	103	103	303	404	103	0	303	202	404	404	303	202	404	303	303	102	204	204	404	204	204	103
02RS_6118	*	404	103	202	102	304	204	103	204	101	101	303	404	202	103	202	303	102	202	101	0	303	202	202	102	303	303	103	103	303	404	101	404	303	202	404	404	303	202	204	303	303	102	204	204	404	202	204	103
02RS_6119	*	404	103	202	102	304	404	303	204	101	101	303	204	204	103	202	303	202	204	103	303	303	202	202	101	303	303	103	303	304	404	303	204	303	102	404	404	303	202	404	303	303	102	204	204	404	404	204	103
02RS_6120	*	404	103	203	102	304	404	303	204	101	102	303	204	404	103	202	303	202	202	101	103	303	202	202	101	103	303	103	103	303	404	101	202	303	0	204	404	303	202	404	303	303	102	202	204	404	404	204	103
02RS_6121	*	404	103	202	102	404	204	303	204	101	101	303	204	204	101	202	303	102	202	101	101	303	202	202	101	303	303	103	103	303	404	101	202	303	202	404	404	303	202	404	303	303	102	202	204	404	204	204	103
02RS_6122	*	404	103	203	102	304	204	303	204	101	101	303	404	404	103	202	303	102	202	101	101	303	202	202	102	303	303	103	103	304	404	101	202	103	202	404	404	303	202	202	303	303	102	202	204	404	404	204	103
02RS_6123	*	404	103	202	102	404	204	303	204	101	102	303	204	404	103	202	303	102	202	101	101	303	202	202	102	303	303	103	103	304	404	103	204	303	202	404	404	303	202	204	303	103	102	204	204	404	204	204	103
02RS_6124	*	404	103	202	101	304	202	303	202	101	102	303	204	204	103	202	303	202	202	0	101	303	0	202	101	303	303	303	101	303	404	101	202	101	202	404	404	303	202	204	303	303	101	202	202	404	202	202	101
02RS_6125	*	404	101	203	102	404	204	303	204	101	101	303	204	202	101	202	303	102	204	103	101	303	202	202	102	103	303	103	101	303	404	103	202	303	202	404	404	303	202	202	303	303	102	202	204	404	404	204	103
02RS_6126	*	404	103	203	102	304	204	303	204	101	101	303	204	204	101	202	304	202	202	101	101	303	202	202	101	303	303	103	101	303	404	101	204	103	202	404	404	203	202	202	303	103	102	202	204	404	404	204	0
02RS_6127	*	404	103	203	102	303	204	303	204	101	101	303	404	204	101	202	303	202	202	101	101	303	202	202	102	303	303	103	303	304	404	103	202	103	202	404	404	303	202	204	303	303	102	202	204	404	204	204	103
02RS_6128	*	404	103	202	102	404	204	303	204	101	101	303	404	202	101	202	303	202	204	101	101	303	202	303	102	103	303	103	103	304	404	101	202	303	0	204	404	303	202	204	303	303	102	404	204	404	204	204	103
02RS_6129	*	404	103	202	102	404	404	303	204	101	102	303	204	204	103	202	303	202	202	103	0	303	202	203	101	101	303	103	103	303	404	103	404	303	202	404	404	203	202	404	303	303	102	202	204	404	204	204	103
02RS_6130	*	404	103	202	101	304	404	303	204	101	102	303	404	202	101	202	304	202	202	103	101	303	202	202	101	303	303	103	103	303	404	103	202	303	202	204	404	303	202	204	303	303	101	202	202	404	404	204	101
02RS_6132	*	404	103	202	102	404	204	303	204	101	101	303	404	204	101	204	303	202	202	101	0	303	202	202	101	303	303	103	103	303	404	303	404	303	202	204	404	303	202	204	303	303	102	202	204	404	404	204	103
02RS_6133	*	404	103	202	102	404	204	303	204	101	101	303	404	202	101	202	303	202	202	101	101	303	202	202	101	103	303	103	101	303	404	103	204	303	202	204	404	303	202	204	303	103	101	202	204	404	404	204	103
02RS_6134	*	404	103	203	102	404	204	303	404	101	102	303	404	202	303	202	303	202	202	103	101	303	202	203	102	103	303	101	103	304	404	103	204	303	202	204	0	303	202	404	303	303	102	204	204	404	204	204	103
05LV_130	*	404	103	203	101	404	204	303	204	101	101	303	404	404	101	202	303	102	202	101	??	303	202	203	101	303	303	303	101	404	404	101	204	103	202	204	404	303	202	404	303	303	101	204	204	404	404	204	101
05LV_131	*	404	101	203	101	404	204	303	204	101	102	303	404	202	101	202	303	202	202	101	??	303	202	202	101	303	303	303	103	304	404	101	204	303	102	404	404	303	202	202	303	303	101	202	204	404	204	204	101
05LV_132	*	404	103	203	101	404	204	303	204	101	102	303	204	202	101	202	303	202	??	103	101	303	??	202	102	303	303	303	103	304	404	101	404	303	102	404	404	303	202	404	303	303	202	204	204	??	204	202	101
05LV_134	*	404	101	203	101	304	204	303	204	101	202	303	404	204	303	202	304	202	202	101	101	303	202	303	101	303	303	303	103	303	404	103	204	103	202	204	404	303	202	204	303	303	101	204	204	404	404	204	101
05LV_136	*	404	103	202	101	404	204	303	204	101	101	303	204	204	101	202	304	202	202	103	??	303	202	303	202	303	303	303	303	303	404	101	204	303	202	404	404	203	202	404	303	103	101	202	204	404	404	204	101
05LV_137	*	404	103	202	101	404	204	303	204	101	101	303	404	204	101	202	303	202	404	101	101	303	202	202	101	103	303	303	101	303	404	101	202	103	202	204	404	203	202	204	303	303	101	202	204	404	204	204	101
05LV_139	*	404	101	202	101	404	204	103	204	101	102	303	204	204	101	202	303	102	202	101	303	303	202	202	202	303	303	303	101	404	404	103	204	303	202	404	404	203	202	202	303	303	101	202	204	404	404	204	101
05LV_140	*	404	103	203	101	404	204	103	204	101	101	303	204	204	101	202	303	202	202	101	303	303	202	202	101	103	303	303	101	303	404	103	202	103	202	404	404	303	202	202	303	103	101	202	204	404	404	204	101
05LV_143	*	404	303	202	101	304	204	303	404	101	101	303	204	404	103	202	303	202	202	101	101	303	202	203	101	303	303	303	103	303	404	103	404	103	202	404	404	303	202	404	303	303	101	404	204	404	404	204	101
05LV_145	*	404	103	202	101	404	204	303	204	101	101	303	204	202	101	202	303	202	202	103	??	303	202	202	102	103	303	303	103	303	404	103	202	303	202	404	404	303	202	204	303	103	101	202	204	404	404	204	101
05LV_146	*	404	303	203	101	304	404	303	204	101	101	303	204	202	101	204	303	202	404	103	303	303	202	202	101	303	303	303	101	404	404	103	404	101	202	204	404	303	202	404	303	101	101	??	204	404	404	204	101
05LV_147	*	404	103	202	101	404	204	303	204	101	101	303	404	202	103	202	303	102	202	101	101	303	202	203	101	303	303	303	303	303	404	103	204	303	202	204	404	303	202	404	303	303	101	404	204	404	404	204	101
05LV_148	*	404	303	202	101	404	204	303	204	101	101	303	204	202	103	202	303	202	202	101	103	303	202	203	102	303	303	303	103	303	404	103	202	303	202	204	404	303	202	204	303	303	101	404	204	204	204	204	101
05LV_149	*	404	303	202	101	404	404	303	204	101	101	303	404	202	101	202	303	202	202	101	101	303	202	203	101	303	303	303	103	303	404	101	404	303	202	404	404	303	202	204	303	303	101	202	204	404	404	204	101
05LV_150	*	404	103	202	101	404	404	103	204	101	102	303	404	204	103	202	303	202	404	303	101	303	202	303	102	303	303	303	103	303	404	101	202	103	102	204	404	303	202	204	303	303	102	204	204	404	404	204	101
05LV_151	*	404	103	202	101	303	204	303	204	101	102	303	404	204	103	202	304	202	202	101	303	303	202	303	101	103	303	303	101	303	404	303	202	103	202	204	404	303	202	204	303	303	101	202	204	404	404	204	101
05LV_152	*	304	303	203	101	404	204	103	204	101	102	303	204	404	303	202	303	102	202	103	101	303	202	202	101	103	303	303	101	303	404	103	202	103	102	202	404	203	202	204	303	303	101	??	204	404	404	204	101
05LV_153	*	404	103	202	101	404	204	303	204	101	102	303	204	204	103	202	303	102	202	103	303	303	202	203	202	103	303	303	101	303	404	103	202	101	202	204	404	303	202	202	303	303	101	204	204	404	204	204	101
05LV_154	*	404	103	202	101	304	404	303	204	101	101	303	202	404	101	202	303	102	202	103	101	303	202	203	101	303	303	303	303	303	404	101	202	303	102	404	404	303	202	202	303	103	101	202	204	404	404	204	101
05LV_155	*	404	103	202	101	404	204	303	204	101	101	303	404	202	103	202	303	202	404	103	103	303	202	202	102	303	303	103	103	303	404	303	202	303	202	404	404	303	202	204	303	303	101	202	204	404	404	204	101
05LV_156	*	404	303	203	101	304	404	303	204	101	101	303	204	204	303	202	303	202	404	103	101	303	202	202	102	303	303	303	103	303	404	303	204	103	102	204	404	303	202	202	303	303	101	404	204	404	404	204	101
05LV-157	*	404	101	203	101	404	204	103	204	??	102	303	404	202	103	202	303	101	202	103	101	303	202	203	101	303	303	303	303	303	404	103	204	103	202	404	404	303	202	204	303	303	101	202	204	404	204	204	101
05LV_158	*	404	303	202	101	304	204	303	404	101	101	303	202	404	101	202	303	202	404	103	101	303	202	303	202	103	303	303	103	404	404	103	??	101	101	204	404	203	202	202	303	103	101	404	204	404	204	204	101
05LV_159	*	404	303	203	101	??	404	303	204	101	101	??	404	204	101	202	303	202	202	101	101	303	202	203	102	303	303	303	103	303	404	101	404	303	102	204	404	303	202	202	303	303	101	202	204	404	404	204	101
05LV_160	*	404	303	203	101	??	404	303	204	101	101	??	404	204	101	202	303	202	202	101	101	303	202	203	102	303	303	303	103	303	404	101	404	303	102	204	404	303	202	202	303	303	101	202	204	404	404	204	101
05LV_161	*	404	303	203	101	404	404	303	204	101	202	303	204	204	103	204	303	202	202	101	??	303	202	203	101	103	303	303	101	404	404	101	202	103	202	204	404	303	202	404	303	103	101	204	204	404	404	404	101
05LV_162	*	404	101	202	101	404	404	103	204	101	101	303	404	202	101	202	304	202	202	101	101	303	202	202	??	303	303	303	101	303	404	101	202	103	202	404	404	203	202	404	303	303	101	202	404	404	204	204	101
05LV_163	*	404	103	203	101	304	204	103	204	101	101	303	404	204	101	202	303	202	404	101	101	303	202	203	101	103	303	303	303	303	404	103	202	303	102	204	404	203	202	204	303	303	101	202	204	404	204	204	101
05LV_164	*	404	303	202	101	404	204	103	204	101	101	303	404	202	103	202	303	202	404	101	101	303	202	202	102	303	303	101	103	303	404	101	202	303	202	404	404	202	202	204	303	103	101	204	204	404	404	204	101
05LV_167	*	404	103	203	101	404	204	303	204	101	101	303	204	204	103	204	303	202	202	101	101	303	202	203	101	303	303	303	101	304	404	103	204	103	202	404	404	303	202	404	??	303	101	204	204	404	404	204	101
05LV_169	*	404	101	203	101	404	204	303	204	101	102	303	404	404	101	202	303	202	202	101	303	303	202	203	102	303	303	303	101	303	404	101	404	303	202	404	404	303	202	404	303	303	101	204	204	404	404	204	101
05LV_170	*	404	303	202	101	304	??	303	204	101	102	303	204	204	101	204	303	202	202	101	101	303	202	202	102	303	303	303	103	303	404	101	202	103	202	204	404	303	202	204	303	303	101	204	204	404	204	202	101
05LV_172	*	404	103	303	101	404	204	303	204	101	101	303	202	404	101	202	303	202	202	101	101	303	202	202	101	303	303	303	101	303	404	103	??	303	202	404	404	303	202	202	303	303	101	202	204	404	404	204	101
05LV_173	*	404	303	203	101	304	204	303	204	101	101	303	404	202	103	202	303	202	202	103	101	303	202	303	202	103	303	303	101	303	404	101	204	103	202	204	404	303	202	204	303	303	101	202	204	404	204	204	101
05LV_174	*	404	303	203	101	304	204	303	204	101	101	303	202	204	103	204	304	202	202	103	101	303	202	202	102	303	303	303	103	304	404	101	202	303	102	404	404	203	202	204	303	303	101	202	204	404	404	204	101
05LV_175	*	404	103	203	101	304	404	303	204	101	102	303	404	204	103	202	303	202	??	103	101	303	??	203	102	303	303	303	103	303	404	103	204	103	202	204	404	303	202	204	303	303	101	204	204	404	204	204	101
05LV_177	*	404	103	202	101	304	204	303	204	101	101	303	404	404	103	202	303	202	202	101	101	303	202	203	102	303	303	303	101	304	404	101	202	303	??	204	404	303	202	204	303	303	101	202	404	404	404	204	101
05LV_178	*	404	103	202	101	404	404	103	204	101	202	203	204	204	103	202	304	??	204	101	103	??	202	203	102	303	303	303	103	303	404	103	404	103	102	204	404	203	202	204	303	103	101	204	??	204	204	204	101
05LV_182	*	404	303	203	101	304	204	303	204	101	101	303	404	204	103	202	303	202	202	101	101	303	202	203	101	303	303	303	103	303	404	101	404	303	101	404	404	303	102	202	303	303	101	204	204	404	404	204	101
05LV_183	*	404	103	202	101	404	204	303	204	101	101	303	404	202	101	202	303	202	202	101	303	303	202	203	101	103	303	303	103	303	404	101	202	103	202	204	404	203	202	404	303	103	101	202	204	404	204	204	101
05LV_184	*	404	103	202	101	304	204	303	204	101	102	303	404	204	103	202	304	202	202	103	101	303	202	202	101	303	303	303	101	303	404	103	202	103	102	404	404	203	202	202	303	303	101	404	204	404	404	204	101
05LV_186	*	404	103	202	101	304	404	303	204	101	101	303	204	204	303	202	303	202	202	101	103	303	202	203	101	103	303	303	101	303	404	103	204	303	202	204	404	303	202	204	303	303	101	204	204	404	404	??	101
05LV_188	*	404	303	202	101	404	204	303	204	101	101	303	204	204	101	202	303	102	202	101	303	303	202	202	101	303	303	303	103	303	404	103	204	101	102	204	404	303	202	204	303	303	101	202	204	404	404	204	101
05LV_189	*	404	103	203	101	304	204	303	204	101	202	303	404	202	103	202	303	202	202	101	303	303	202	203	101	101	303	303	103	304	404	103	404	303	202	204	404	303	202	404	303	303	102	404	204	404	204	204	101
05LV_190	*	404	103	203	101	304	204	303	204	101	202	303	404	202	103	202	303	202	202	101	303	303	202	203	101	101	303	303	103	304	404	103	404	303	202	204	404	303	202	404	303	303	102	404	204	404	204	204	101
05LV_191	*	404	303	203	101	304	204	303	204	101	101	303	204	404	103	202	303	202	202	103	101	303	202	202	101	303	303	303	101	303	404	101	??	303	101	204	404	203	202	404	303	303	101	204	204	404	404	204	101
05LV_193	*	404	303	202	101	304	204	303	204	101	101	303	202	202	101	202	303	202	202	101	101	303	202	202	102	303	303	303	101	303	404	101	202	303	101	404	404	203	202	204	303	303	101	202	204	404	204	204	101
05LV_194	*	404	303	203	101	404	204	303	204	101	101	303	404	404	101	202	303	202	202	101	103	303	202	203	102	303	303	303	101	304	404	103	202	103	202	404	404	303	202	404	303	303	101	202	204	404	404	204	101
05LV_196	*	404	303	202	101	404	204	303	204	101	101	303	202	204	103	202	303	202	404	103	303	303	202	202	101	103	303	303	303	303	404	103	204	303	202	404	404	303	202	202	303	303	101	204	204	404	404	204	101
05LV_197	*	404	103	203	101	303	204	303	204	101	102	303	204	202	103	202	303	202	202	101	101	303	202	202	102	303	303	303	103	303	404	101	202	303	202	404	404	203	202	404	303	303	101	404	204	404	404	204	101
05LV_198	*	404	103	203	101	304	204	103	204	101	102	303	404	204	101	202	303	102	202	101	303	303	202	202	101	303	303	303	103	303	404	303	404	103	101	404	404	203	202	404	303	303	101	404	204	404	404	204	101
05LV_199	*	404	303	202	101	304	404	303	204	101	102	303	204	202	103	202	304	202	202	101	101	303	202	203	101	103	303	303	101	303	404	101	202	103	??	204	404	303	202	404	303	103	101	404	204	404	202	204	101
05LV_1001	*	404	103	202	101	404	204	303	204	101	102	??	404	202	103	202	303	202	404	101	101	303	202	303	101	103	303	303	103	303	404	101	404	103	202	204	404	303	202	404	303	303	101	404	204	404	404	204	101
05LV_1003	*	404	303	202	101	304	204	303	204	101	102	303	204	204	303	202	303	102	202	101	101	303	202	202	102	303	303	303	101	404	404	101	204	103	202	204	404	303	202	204	303	303	101	202	404	404	404	204	101
05LV_1004	*	404	303	202	101	304	204	303	204	101	101	303	404	204	103	202	303	102	202	103	103	303	202	203	101	303	303	303	101	303	404	103	202	103	102	404	404	203	102	204	303	303	101	404	204	404	204	204	101
05LV_1006	*	404	303	202	101	404	204	303	204	101	101	303	204	204	103	202	303	202	202	101	103	303	202	202	102	303	303	303	101	303	404	103	202	303	202	404	404	203	202	204	303	303	101	204	204	404	204	204	101
05LV_1007	*	404	303	203	101	404	204	303	204	101	101	303	204	404	103	202	303	102	202	101	101	303	202	202	101	303	303	303	101	303	404	103	404	103	101	202	404	203	202	204	303	103	101	404	204	404	204	204	101
05LV_1009	*	404	103	202	101	303	404	303	204	101	101	303	404	404	101	202	303	202	202	101	303	303	202	202	101	103	303	303	103	303	404	101	202	101	202	204	404	303	202	204	303	303	101	202	204	404	404	204	101
05LV_1010	*	404	103	202	101	404	204	103	204	101	??	303	404	202	101	202	304	202	202	101	303	303	202	202	202	303	303	303	103	303	404	303	202	103	102	404	404	303	202	404	303	??	101	204	204	404	204	204	101
05LV_1012	*	404	103	203	101	404	204	303	204	101	101	303	404	202	101	202	303	102	202	103	101	303	202	203	101	103	303	303	101	303	404	103	204	103	202	404	404	203	202	404	303	303	101	204	204	404	204	204	101
05LV_1013	*	404	303	203	101	404	404	303	204	101	101	303	202	204	103	202	303	202	202	101	103	303	202	202	102	303	303	303	103	303	404	103	202	303	102	404	404	303	202	204	303	103	101	202	204	404	404	204	101
05LV_1015	*	404	303	202	101	404	204	303	204	101	102	303	404	204	101	202	303	202	404	101	101	303	202	202	102	303	303	303	103	303	404	101	204	103	202	404	404	303	202	202	303	303	101	204	204	204	404	204	101
05LV_1016	*	404	103	303	101	404	404	103	204	101	202	303	204	204	103	202	303	202	202	101	101	303	202	202	202	303	303	303	103	303	404	103	202	103	101	404	404	303	202	202	303	303	101	204	204	404	204	204	101
05LV_1018	*	404	303	202	101	404	204	303	204	101	101	303	204	204	103	202	303	202	202	101	101	303	202	202	102	101	303	303	103	304	404	101	202	303	102	204	404	303	202	204	303	303	101	204	204	404	204	204	101
05LV_1019	*	404	303	202	101	304	404	303	204	101	202	303	204	202	103	202	303	202	202	101	101	303	202	203	102	303	303	303	103	303	404	103	204	303	202	404	404	203	202	404	303	303	101	202	204	404	404	204	101
05LV_1021	*	404	303	202	101	404	404	303	204	101	202	??	204	204	101	202	303	202	202	101	101	303	202	202	102	303	303	303	101	303	404	101	204	303	202	204	404	203	102	204	303	303	101	204	204	404	204	204	101
05LV_1022	*	404	103	203	101	404	404	303	204	101	101	303	404	204	103	202	303	202	202	101	101	303	202	202	102	103	303	303	303	303	404	103	404	103	202	204	404	203	202	204	303	303	101	??	204	404	404	204	101
05LV_1024	*	404	101	202	101	404	404	303	204	101	101	303	404	202	101	202	303	202	202	103	101	303	202	202	101	101	303	303	103	303	404	101	204	103	102	404	404	303	202	204	303	103	101	204	204	404	204	204	101
05LV_1025	*	404	103	202	101	404	204	303	204	101	101	303	204	202	101	202	303	202	202	101	??	303	202	303	102	103	303	303	103	303	404	103	202	303	102	404	404	203	202	404	303	303	101	404	204	404	404	204	101
05LV_1027	*	??	101	202	101	404	204	303	204	101	101	303	204	204	103	202	303	202	202	101	101	303	202	202	102	103	303	303	103	303	404	101	404	303	202	204	404	203	202	404	303	303	101	404	204	204	204	204	101
05LV_1028	*	404	103	203	101	304	404	303	204	101	102	303	404	202	101	202	304	202	202	101	101	303	202	203	101	303	303	303	103	404	404	103	202	303	??	204	404	203	202	204	303	103	101	202	204	404	404	204	101
05LV_1030	*	404	101	202	101	404	204	303	204	101	101	303	204	202	101	202	303	202	202	101	101	303	202	202	101	303	303	303	303	303	404	101	??	303	202	404	404	303	202	404	303	303	101	204	204	404	204	204	101
05LV_1031	*	404	303	203	101	404	404	303	204	101	101	303	404	202	101	202	303	101	202	101	101	303	202	202	101	303	303	303	101	303	404	101	202	303	202	204	404	303	202	204	303	103	101	202	204	404	404	204	101
05LV_1033	*	404	103	202	101	304	404	303	204	101	101	303	202	204	101	202	303	202	202	101	101	303	202	202	202	303	303	303	101	303	404	103	204	103	202	404	404	203	202	202	303	103	101	202	204	404	404	204	101
05LV_1034	*	404	103	203	101	304	204	303	204	101	102	303	404	204	103	202	303	202	202	101	103	303	202	202	102	303	303	303	303	304	404	101	202	103	102	404	404	303	202	204	303	303	101	204	204	404	404	204	101
05LV_1036	*	404	303	203	101	404	204	303	204	101	102	303	204	202	303	202	303	102	202	101	103	303	202	303	101	303	303	303	101	303	404	103	202	103	202	404	404	303	202	404	303	303	101	202	204	404	404	204	101
05LV_1037	*	404	303	203	101	304	204	303	204	101	102	303	404	204	103	202	303	202	202	101	103	303	202	202	101	303	303	303	101	303	404	303	202	103	202	404	404	303	202	404	303	103	101	204	204	404	404	204	101
05LV_1039	*	404	103	203	101	404	404	303	204	101	101	303	404	204	103	202	303	202	202	103	101	303	202	203	101	103	303	303	103	303	404	101	204	303	202	204	404	303	202	404	303	303	101	404	204	404	204	204	101
05LV_1040	*	404	103	203	101	304	204	303	204	101	101	303	204	204	103	202	303	202	202	101	101	303	202	203	202	303	303	303	101	303	404	101	202	303	202	404	404	303	202	204	303	303	101	202	204	404	404	204	101
05LV_1042	*	404	303	203	101	304	204	103	204	101	101	303	404	202	101	202	303	202	202	101	303	303	202	203	101	303	303	303	101	303	404	103	404	103	202	404	404	303	202	204	303	103	101	202	204	204	404	204	101
05LV_1101	*	404	103	203	101	404	404	303	204	101	101	303	404	404	101	202	303	202	404	103	101	303	202	203	102	103	303	303	303	303	404	101	202	303	202	404	404	202	202	204	303	303	101	204	204	404	202	204	101
05LV_1102	*	404	303	202	101	404	404	303	204	101	101	303	404	204	101	202	303	202	202	101	101	303	202	203	101	303	303	303	303	304	404	101	404	303	202	404	404	203	202	404	303	303	101	404	204	404	404	204	101
05LV_1103	*	404	101	202	101	304	204	303	204	101	102	303	202	204	101	202	303	202	??	103	101	303	??	203	102	103	303	303	303	404	404	103	202	303	202	404	404	303	202	404	303	303	101	202	204	??	204	204	101
05LV_1104	*	404	303	202	101	304	204	303	204	101	101	202	204	204	103	202	304	202	202	101	101	303	202	202	101	103	303	303	103	304	404	101	204	101	102	404	404	303	202	404	303	103	101	202	204	204	404	204	101
05LV_1105	*	404	303	202	101	404	204	303	204	101	202	303	202	204	101	204	303	202	??	103	303	303	??	202	101	303	303	303	103	304	404	303	202	103	102	404	404	303	202	202	303	303	101	202	??	404	204	204	101
05LV_1106	*	404	101	202	101	304	204	303	204	101	??	303	404	202	103	202	303	202	202	101	101	303	202	203	102	103	303	303	303	303	404	101	202	103	202	204	404	303	202	202	303	303	101	202	204	404	404	404	101
05LV_1107	*	404	103	203	101	404	204	303	204	101	??	303	202	202	103	202	303	102	202	103	101	303	202	202	101	103	303	303	101	303	404	103	204	303	202	204	404	203	202	404	303	303	101	202	204	404	202	204	101
05LV_1108	*	404	303	203	101	304	204	303	204	101	101	303	404	204	303	202	303	202	202	103	101	303	202	202	101	103	303	303	103	303	404	101	202	303	102	404	404	303	202	204	303	303	101	202	204	404	404	204	101
05LV_1109	*	404	303	203	101	404	204	303	204	101	101	303	404	204	103	202	303	202	202	103	101	303	202	303	102	303	303	303	103	303	404	103	204	303	101	204	404	303	102	204	303	303	101	202	204	404	204	204	101
05LV_1110	*	404	101	303	101	404	404	103	204	101	101	303	404	204	101	202	303	202	202	103	303	303	202	202	101	303	303	303	101	303	404	101	202	303	102	404	404	303	202	404	303	303	101	202	204	404	404	204	101
05LV_502	*	404	103	203	101	304	202	303	204	101	202	0	204	204	103	202	303	202	202	101	101	303	202	202	101	0	303	0	101	303	404	103	202	101	102	204	404	303	202	404	303	303	102	204	202	404	204	204	103
05LV_503	*	304	103	202	101	404	202	303	204	101	202	303	404	204	101	202	303	202	202	101	0	303	202	203	102	103	303	103	103	303	404	103	202	103	202	204	404	203	202	204	103	303	102	202	202	404	404	204	103
05LV_505	*	404	303	202	101	404	202	303	204	101	0	303	404	202	101	202	303	202	202	303	103	303	202	203	102	303	303	101	103	303	404	101	204	303	202	404	404	303	202	404	303	303	102	202	202	404	404	204	103
05LV_506	*	404	303	203	101	404	204	303	204	101	101	303	404	202	103	202	303	202	202	101	101	303	202	202	102	103	303	103	103	303	404	101	404	303	202	404	404	303	202	404	303	303	102	202	202	404	404	204	103
05LV_508	*	404	103	202	101	404	202	303	204	101	202	303	202	202	103	202	303	202	404	101	101	303	202	203	101	303	303	103	101	303	404	103	202	0	202	404	404	303	202	404	303	303	102	404	202	404	404	204	0
05LV_509	*	404	303	202	101	404	202	303	204	101	101	303	204	202	103	202	303	202	202	101	101	303	202	203	102	103	303	103	101	303	404	101	202	103	202	204	404	303	202	404	101	103	101	204	202	404	204	204	103
05LV_511	*	404	103	202	101	404	202	303	204	101	101	303	404	202	303	202	303	202	202	101	101	303	202	202	102	0	303	103	101	304	404	101	202	303	202	204	404	303	202	204	303	303	102	204	204	404	204	204	103
05LV_512	*	404	103	203	101	304	202	303	204	101	101	303	404	204	303	202	303	202	202	103	101	303	202	203	202	303	303	103	101	303	404	101	202	303	202	404	404	203	202	202	303	303	102	204	202	404	404	204	103
05LV_514	*	404	303	203	101	404	202	103	204	101	101	303	204	202	103	202	303	202	404	101	103	303	202	203	102	303	303	103	303	304	404	101	404	101	202	404	404	203	202	404	303	303	102	204	202	404	404	204	103
05LV_515	*	404	303	303	101	404	202	101	204	101	101	303	204	204	101	202	303	202	202	101	303	303	202	203	102	103	303	101	303	303	404	103	202	303	202	404	404	303	202	202	103	303	102	202	202	404	202	204	103
05LV_517	*	404	101	203	101	404	202	303	204	101	101	303	204	202	101	202	304	202	202	101	303	303	202	202	202	303	303	103	101	304	404	101	404	303	102	404	404	303	202	404	303	303	102	204	202	204	404	204	103
05LV_518	*	404	303	203	101	303	202	303	204	101	202	303	202	202	103	202	303	202	202	103	101	303	202	203	101	303	303	103	103	304	404	103	202	303	202	404	404	303	202	202	303	103	102	202	202	404	404	204	101
05LV_520	*	404	103	203	101	404	204	103	204	101	202	303	404	202	101	202	304	102	202	101	101	303	202	203	101	303	303	101	103	303	404	103	202	303	202	404	404	203	101	404	303	303	102	204	202	404	404	204	103
05LV_521	*	404	103	203	101	304	204	303	0	101	101	303	204	202	103	202	303	202	202	101	101	303	202	203	102	103	303	103	101	303	404	101	404	101	202	204	404	303	202	204	303	303	102	404	202	404	404	204	101
05LV_523	*	404	101	203	101	304	202	303	204	101	0	303	204	202	103	202	303	202	202	103	101	303	202	303	101	303	303	103	101	303	404	103	404	303	202	404	404	203	202	404	303	303	102	204	202	404	202	204	103
05LV_526	*	404	103	202	101	404	202	303	204	101	101	303	204	202	103	202	303	202	202	101	303	303	202	303	202	0	303	101	303	304	404	101	202	303	202	204	404	203	102	204	303	303	102	202	202	404	404	204	103
05LV_527	*	404	103	202	101	404	204	303	204	101	101	303	204	202	103	202	303	202	202	101	101	303	202	203	202	103	303	103	101	303	404	103	204	303	202	404	404	203	202	404	303	303	102	202	202	404	204	204	103
05LV_530	*	404	103	203	101	304	202	103	204	101	202	303	404	202	101	202	304	202	404	101	103	303	202	203	202	303	303	103	103	303	404	101	404	303	202	204	404	303	202	404	303	303	202	202	202	404	404	0	103
05LV_532	*	404	303	202	101	404	202	303	204	101	101	303	404	204	103	202	304	202	202	103	303	303	202	202	101	103	303	103	103	303	404	103	202	103	202	404	404	303	202	204	303	103	102	202	202	404	404	204	103
05LV_533	*	404	303	203	101	404	202	303	204	101	101	303	204	202	103	202	304	202	202	101	103	303	202	202	102	303	303	103	103	303	404	101	202	303	202	404	404	203	202	404	303	303	102	202	204	404	204	204	103
05LV_535	*	404	303	203	101	404	204	303	204	101	202	303	204	202	103	204	303	202	202	101	101	303	202	202	101	101	303	103	101	303	404	101	202	103	101	404	404	303	202	404	303	303	202	202	202	204	404	204	103
05LV_536	*	404	101	202	101	304	202	103	204	101	101	303	404	202	101	202	303	202	404	101	103	303	202	203	101	303	303	103	103	304	404	103	202	103	202	404	404	303	202	404	303	303	102	204	202	404	404	204	103
05LV_538	*	404	303	202	101	304	202	303	202	101	0	303	404	202	101	202	303	202	404	103	303	303	202	202	101	303	303	0	101	303	404	101	404	303	202	202	404	303	202	404	303	0	101	404	202	404	404	204	101
05LV_539	*	404	303	202	101	404	202	101	204	101	101	303	204	202	101	202	303	102	202	101	101	303	202	203	102	103	303	103	101	304	404	103	204	103	202	404	404	303	202	404	303	303	102	202	202	404	404	204	103
05LV_541	*	404	103	303	101	404	202	303	404	101	202	303	404	204	303	202	303	202	202	101	303	303	202	202	101	303	303	103	103	303	404	303	204	101	202	204	404	303	202	404	303	303	102	202	202	404	404	204	103
05LV_542	*	404	103	203	101	304	202	303	204	101	101	303	204	202	101	204	304	202	202	103	103	303	202	203	102	303	303	103	101	304	404	101	202	303	202	404	404	303	202	204	303	103	202	202	202	404	204	204	103
05LV_544	*	404	103	203	101	404	204	103	404	101	101	303	204	202	303	202	303	202	202	101	101	303	202	202	102	303	303	103	103	303	404	101	202	303	102	404	404	303	202	202	303	303	102	202	202	204	404	204	103
05LV_545	*	404	103	202	101	404	204	303	204	101	101	0	404	202	103	202	303	202	202	101	101	303	202	203	101	303	303	103	103	303	404	101	202	103	202	204	404	303	202	404	303	303	102	204	202	404	404	404	103
05LV_547	*	404	101	202	101	404	202	303	404	101	101	303	404	202	101	202	303	202	202	101	101	303	202	202	101	101	303	101	103	303	404	303	204	303	202	404	404	303	202	202	303	103	102	202	202	404	204	204	103
05LV_548	*	404	303	202	101	304	204	303	204	101	202	303	404	202	103	202	303	102	202	101	101	303	202	202	101	103	303	103	101	303	404	101	204	103	202	204	404	203	202	204	303	103	102	404	202	404	204	204	0
05LV_550	*	404	103	203	101	304	204	303	204	101	101	303	204	202	101	202	303	202	202	101	101	303	202	203	101	303	303	103	101	303	404	103	202	303	202	204	404	203	202	404	303	103	102	202	202	404	204	204	0
05LV_551	*	404	103	202	101	404	204	303	204	101	202	303	404	202	303	202	303	102	202	103	101	303	202	203	101	303	303	103	101	304	404	101	202	103	102	404	404	303	202	404	303	303	102	202	202	404	204	204	103
05LV_553	*	404	101	203	101	404	202	303	404	101	202	303	404	202	103	204	303	202	404	101	101	303	202	303	102	303	303	103	103	303	404	103	202	103	101	404	404	203	202	404	303	303	102	202	204	404	404	204	103
05LV_554	*	404	101	303	101	304	202	303	204	101	101	303	204	204	101	202	303	202	202	101	101	303	202	203	102	303	303	103	103	303	404	103	0	303	202	204	404	303	202	204	303	103	102	204	202	404	204	204	103
05LV_556	*	404	103	202	101	404	202	303	204	101	101	303	202	202	101	204	303	202	202	101	303	303	202	202	102	303	303	103	101	303	404	101	202	103	0	204	404	303	202	404	303	303	102	204	202	404	404	204	101
05LV_557	*	404	103	303	101	303	202	303	204	101	202	303	204	202	103	202	303	202	202	101	303	303	202	203	102	303	303	103	303	303	404	103	202	101	102	404	404	203	202	404	303	303	102	202	204	404	404	204	103
05LV_559	*	404	103	202	101	404	204	303	204	101	0	303	404	202	101	202	303	202	202	101	101	303	202	203	102	303	303	103	101	304	404	303	202	103	102	404	404	303	202	204	303	303	102	202	202	404	404	204	103
05LV_560	*	304	303	203	101	304	202	303	204	101	202	303	204	202	103	202	303	102	404	101	101	303	202	203	202	103	303	103	103	303	404	103	202	303	102	404	404	303	102	202	303	303	102	202	202	404	204	204	103
05LV_562	*	404	103	203	101	304	204	303	204	101	101	303	204	204	303	202	303	202	202	101	101	303	202	202	101	101	303	103	103	303	404	103	202	303	102	404	404	303	202	202	303	303	102	202	204	404	404	204	0
05LV_565	*	404	103	203	101	304	202	303	204	101	202	303	204	204	101	202	303	202	404	103	303	303	202	202	101	101	303	103	101	303	404	103	202	103	202	404	404	303	202	202	303	303	102	204	202	404	204	204	103
05LV_566	*	404	103	303	101	404	204	103	204	101	101	303	204	204	103	202	303	202	202	103	303	303	202	203	101	103	303	103	101	303	404	103	202	303	202	404	404	303	202	204	303	103	102	204	202	404	404	204	103
05LV_568	*	404	103	203	101	304	202	103	204	101	101	303	204	202	303	202	303	202	202	103	103	303	202	202	101	303	303	103	303	303	404	103	202	101	202	204	404	303	202	202	303	303	102	204	202	404	404	204	103
05LV_571	*	404	103	202	101	304	404	303	204	101	101	303	404	202	103	202	303	202	404	101	101	303	202	203	102	303	303	103	101	303	404	101	202	103	202	404	404	303	202	202	303	303	202	204	202	404	404	204	103
05LV_572	*	404	103	202	101	404	202	303	204	101	202	303	204	202	103	202	303	202	202	101	101	303	202	203	101	103	303	103	101	303	404	303	404	103	202	404	404	203	202	404	303	303	102	202	202	404	204	204	103
05LV_574	*	404	103	202	101	404	204	303	204	101	101	303	204	202	101	202	303	202	202	101	303	303	202	303	102	303	303	103	103	303	404	103	404	103	202	404	404	303	202	204	303	103	102	204	204	404	404	204	103
05LV_575	*	404	103	202	101	304	202	303	204	101	101	303	204	202	101	202	303	202	404	101	101	303	202	303	102	303	303	103	101	303	404	103	204	101	202	404	404	303	202	202	303	303	102	204	202	404	404	204	103
05LV_577	*	404	303	303	101	404	404	303	204	101	101	303	404	202	101	202	303	202	202	101	103	303	202	202	102	103	303	103	103	303	404	101	202	303	202	404	404	303	202	404	303	103	102	202	202	404	404	204	103
05LV_578	*	404	303	202	101	404	202	303	204	101	101	303	202	204	101	202	303	202	404	101	103	303	202	202	101	103	303	103	101	303	404	101	202	303	101	404	404	203	202	202	303	103	102	202	202	404	202	204	103
05LV_580	*	404	101	203	101	404	202	303	204	101	101	303	204	202	103	202	303	102	202	101	303	303	202	202	102	103	303	103	101	303	404	101	202	303	202	404	404	303	202	204	303	303	102	204	202	404	204	204	103
05LV_581	*	404	101	203	101	304	202	303	404	101	101	303	404	202	101	202	303	202	202	103	101	303	202	203	102	103	303	103	101	303	404	101	204	303	202	404	404	303	202	404	303	103	102	204	202	404	204	204	103
05LV_583	*	404	303	202	101	304	204	103	204	101	202	303	404	202	101	202	303	202	202	101	101	303	202	203	102	103	303	103	101	303	404	103	204	303	202	404	404	203	202	202	303	303	102	202	202	404	404	204	103
05LV_584	*	404	303	203	101	304	204	303	202	101	101	303	0	202	103	202	303	102	404	101	303	303	202	202	101	0	303	103	103	304	404	303	0	101	101	404	404	303	102	404	303	303	102	202	202	404	404	404	101
05LV_586	*	404	103	202	101	404	202	303	204	101	202	303	404	202	303	204	303	202	202	101	103	303	202	202	101	101	303	101	101	303	404	101	202	303	102	404	404	303	202	404	303	303	102	404	202	404	404	204	0
05LV_587	*	404	101	202	101	404	204	303	204	101	101	303	202	202	101	202	303	202	202	101	101	303	202	203	202	103	303	103	303	304	404	103	202	303	202	204	404	203	202	404	303	303	102	202	202	404	404	204	103
05LV_590	*	404	303	203	101	404	204	303	204	101	101	303	202	202	103	202	303	202	202	101	101	303	202	202	101	303	303	103	101	303	404	101	204	303	101	404	404	203	202	202	303	303	102	204	202	404	204	204	103
05LV_592	*	404	103	203	101	404	202	303	204	101	101	303	204	202	103	202	303	102	202	101	101	303	202	202	102	103	303	103	103	303	404	103	204	101	202	404	404	303	202	404	303	103	102	202	202	404	204	204	103
05LV_593	*	404	101	202	101	404	202	103	204	101	101	303	404	204	101	202	303	202	202	101	101	303	202	203	101	303	303	0	101	303	404	303	204	303	202	202	404	303	202	404	303	303	102	204	202	404	404	204	103
05LV_595	*	404	303	202	101	404	204	303	204	101	101	303	404	202	103	202	303	202	202	101	101	303	202	203	202	303	303	103	101	304	404	103	202	303	101	204	404	303	202	204	303	303	102	204	202	404	204	204	103
05LV_596	*	404	103	202	101	404	202	103	204	101	202	303	404	202	103	202	303	202	202	101	101	303	202	202	102	303	303	103	103	303	404	103	202	103	202	204	404	303	202	404	303	303	102	202	202	404	404	204	103
05LV_598	*	404	103	202	101	404	202	103	204	101	101	303	204	202	103	202	303	202	202	101	101	303	202	202	101	103	303	103	103	303	404	101	404	303	202	404	404	303	202	404	303	101	102	202	202	404	404	204	103
05LV_599	*	404	103	202	101	404	202	303	204	101	101	303	202	202	103	202	303	202	202	101	0	303	202	202	102	303	303	103	103	303	404	103	204	103	102	404	404	303	202	204	303	303	102	202	202	404	204	204	0
05LV_601	*	404	101	202	101	404	202	303	204	101	101	303	204	204	101	202	303	202	202	101	101	303	202	202	102	103	303	103	103	304	404	101	202	103	202	204	404	303	202	404	303	303	102	202	202	404	204	204	103
05LV_602	*	404	103	303	101	404	202	303	204	101	101	303	404	204	103	202	303	202	202	101	103	303	202	202	101	303	303	103	103	304	404	101	202	303	202	404	404	303	202	404	303	103	102	202	202	404	204	204	103
05LV_604	*	404	101	202	101	304	202	303	204	101	101	303	404	202	103	202	303	102	202	103	101	303	202	202	102	303	303	103	103	304	404	103	204	303	202	204	404	303	202	204	303	103	102	202	202	404	404	204	103
05LV_605	*	0	103	202	101	404	202	103	204	101	202	303	404	202	101	202	303	102	404	103	103	303	202	203	102	303	303	103	303	303	404	103	404	103	202	204	404	203	202	202	303	103	102	404	202	404	404	204	103
05LV_607	*	404	103	203	101	404	204	303	204	101	202	303	204	202	101	202	303	202	202	103	101	303	202	202	102	101	303	101	101	303	404	103	202	303	202	404	404	203	202	204	303	303	102	202	202	404	404	204	103
05LV_608	*	404	103	202	101	404	202	303	204	101	0	303	404	202	303	202	303	202	202	101	101	303	202	203	101	303	303	103	101	303	404	101	204	101	202	404	404	203	202	204	303	303	102	202	202	404	204	204	103
05LV_610	*	404	101	202	101	404	202	303	204	101	101	303	204	202	101	202	303	202	202	101	103	303	202	202	102	303	303	103	103	304	404	103	204	303	202	204	404	303	202	204	303	303	102	202	202	404	404	204	103
05LV_611	*	404	303	202	101	404	204	303	204	101	101	303	204	204	103	202	303	202	202	101	303	303	202	303	202	103	303	103	101	304	404	103	202	103	202	404	404	303	202	204	303	303	102	204	404	404	204	204	0
05LV_613	*	404	303	203	101	304	204	103	0	101	202	303	204	202	101	202	303	202	202	103	101	303	202	203	101	103	303	103	103	303	404	303	202	303	202	404	404	303	202	404	303	101	101	202	202	404	204	204	101
05LV_614	*	404	303	202	101	304	202	303	404	101	202	303	204	202	103	202	303	202	202	101	103	303	202	202	102	303	303	103	101	404	404	103	204	303	202	404	404	303	202	404	303	303	102	404	202	404	404	204	103
05LV_616	*	404	303	202	101	404	204	103	202	101	101	303	204	202	101	202	303	102	404	101	303	303	202	202	101	303	303	303	101	303	404	103	202	103	202	404	404	303	202	404	303	303	101	204	202	404	404	0	101
05LV_617	*	404	103	202	101	404	202	103	204	101	101	303	404	204	103	202	303	202	202	103	303	303	202	203	202	303	303	303	101	303	404	103	404	101	202	404	404	303	202	204	303	103	0	404	202	404	404	204	101
05LV_619	*	404	103	203	101	404	404	303	204	101	202	303	404	202	303	202	303	102	202	101	101	303	202	203	101	103	303	103	101	303	404	101	202	101	202	404	404	202	202	404	303	103	102	404	202	404	404	204	103
05LV_620	*	404	303	202	101	304	202	303	204	101	101	303	202	202	101	202	303	202	202	101	101	303	202	203	102	303	303	103	101	303	404	101	202	303	202	404	404	203	202	202	303	303	102	202	202	404	204	204	101
05LV_622	*	404	303	303	101	303	202	303	0	101	101	303	404	202	101	202	303	202	202	101	101	303	202	203	101	303	303	103	101	303	404	303	202	303	202	202	404	303	202	202	303	101	101	202	202	404	404	204	101
05LV_625	*	304	103	203	101	304	202	303	204	101	202	303	204	202	103	204	303	102	202	101	101	303	202	202	101	103	303	103	101	303	404	303	202	103	101	204	404	203	202	404	303	303	102	202	202	202	404	204	103
05LV_626	*	0	101	303	101	404	202	303	204	101	202	303	404	204	103	202	303	202	202	101	101	303	202	202	202	303	303	103	303	303	404	101	204	303	102	404	404	303	202	404	303	303	102	204	202	404	204	204	103
05LV_628	*	404	303	303	101	404	202	303	204	101	101	303	404	202	103	202	303	202	202	101	101	303	202	202	102	303	303	0	103	404	404	101	202	303	202	404	404	303	202	204	303	303	102	202	202	404	404	0	103
05LV_629	*	404	103	202	101	304	204	303	204	101	101	303	204	202	101	202	303	202	202	101	101	303	202	202	101	303	303	303	303	303	404	101	204	101	202	404	404	303	202	204	303	303	102	202	202	204	404	204	101
05LV_631	*	404	303	202	101	404	202	303	204	101	102	303	202	202	103	202	303	202	202	101	303	303	202	202	101	103	303	101	103	304	404	303	404	103	202	404	404	303	102	204	303	303	102	202	202	404	404	204	103
05LV_632	*	404	303	202	101	304	204	303	204	101	202	303	204	204	103	202	303	202	204	101	101	303	202	202	101	303	303	103	103	303	404	303	202	303	102	404	404	303	202	404	303	303	102	204	202	404	204	204	101
05LV_634	*	304	103	202	101	404	202	303	204	101	101	303	404	202	103	202	303	202	404	101	303	303	202	202	101	103	303	103	103	303	404	103	204	303	102	404	404	203	202	204	303	303	102	204	202	404	404	204	103
05LV_635	*	404	101	202	101	404	202	103	204	101	101	303	204	204	101	202	303	202	202	101	101	303	202	203	101	103	303	103	101	303	404	101	204	101	202	404	404	203	202	204	303	303	102	404	202	404	404	204	103
05LV_637	*	404	103	203	101	304	202	303	204	101	101	303	202	204	103	202	303	202	202	101	303	303	202	202	101	303	303	103	103	303	404	103	204	303	202	404	404	303	202	202	303	303	102	204	202	204	204	204	103
05LV_638	*	404	303	202	101	304	204	303	204	101	101	303	202	204	101	202	303	202	202	103	303	303	202	303	101	103	303	103	101	303	404	101	204	303	202	204	404	303	102	204	303	303	102	202	202	204	404	204	103
05LV_640	*	404	303	202	101	304	202	303	404	101	202	303	404	204	103	202	304	102	202	101	303	303	202	202	102	303	303	103	101	303	404	101	202	303	202	404	404	203	202	202	303	303	102	202	202	404	404	204	101
05LV_641	*	404	103	202	101	304	202	303	404	101	101	303	404	204	303	202	303	202	202	103	101	303	202	202	102	103	303	103	101	303	404	101	202	303	202	404	404	303	202	204	303	303	102	204	202	204	202	204	103
05LV_643	*	404	103	202	101	304	204	303	202	101	0	303	404	404	101	202	303	102	404	101	101	0	0	202	0	303	303	303	103	303	404	101	404	303	202	204	404	203	202	204	303	303	101	202	202	404	404	202	101
05LV_644	*	304	103	303	101	303	202	303	204	101	101	303	404	204	103	202	303	202	202	101	101	303	202	202	101	303	303	103	101	303	404	303	202	101	202	204	404	303	202	404	303	303	102	204	202	404	404	204	103
05LV_646	*	404	103	202	101	404	202	303	204	101	101	303	202	204	103	202	303	202	202	101	101	303	202	202	101	303	303	103	101	303	404	103	202	101	202	204	404	303	202	404	303	103	0	202	202	404	404	204	101
05LV_647	*	404	303	203	101	404	202	303	204	101	101	303	404	202	103	202	303	102	404	103	101	303	202	203	101	303	303	103	101	304	404	101	202	303	102	404	404	203	202	204	303	303	102	204	202	204	202	204	0
16LV_229	*	0	103	202	102	404	202	303	204	101	101	303	404	204	303	202	303	202	202	101	303	303	202	202	101	303	303	103	103	303	404	103	404	103	102	202	404	203	202	204	303	303	102	202	204	404	202	202	101
16LV_231	*	404	303	203	101	404	202	103	204	101	102	303	404	204	303	202	303	202	204	101	103	303	202	202	102	103	303	101	103	304	404	103	204	303	202	404	404	203	202	202	303	303	102	202	204	204	404	202	101
16LV_232	*	304	103	303	101	404	202	303	204	101	101	303	204	204	303	204	303	102	204	101	103	303	202	203	101	103	303	101	103	303	404	101	202	303	202	404	404	303	202	0	303	103	102	202	204	404	204	202	101
16LV_233	*	404	103	203	102	404	202	303	204	101	101	303	404	204	303	202	303	102	204	101	103	303	202	202	101	303	303	103	103	304	404	103	204	103	202	204	404	203	202	404	303	303	102	202	204	404	404	202	101
16LV_235	*	404	303	203	101	303	202	303	204	101	101	303	204	204	303	404	303	202	202	101	101	303	202	203	101	103	303	103	101	303	404	303	404	303	202	204	0	303	202	202	303	303	102	204	204	404	204	202	101
16LV_236	*	404	101	203	102	304	202	103	204	101	101	303	404	204	303	204	303	202	202	101	101	303	202	203	101	303	303	103	101	303	404	101	202	103	202	204	404	303	202	204	303	303	102	202	204	404	404	202	101
16LV_237	*	404	103	202	102	404	202	303	204	101	101	303	204	204	303	204	303	202	202	101	101	303	202	202	101	103	303	103	101	303	404	101	202	303	202	0	404	303	202	0	103	303	102	204	204	404	404	202	101
16LV_240	*	404	303	203	101	404	202	303	204	101	101	303	202	204	303	202	303	202	202	101	303	303	202	203	101	303	303	103	101	303	404	103	202	303	202	404	404	203	202	0	303	303	101	202	204	404	404	202	101
16LV_241	*	304	103	202	102	404	202	303	204	101	202	303	404	204	303	202	303	102	202	103	101	303	202	203	102	103	303	103	103	304	404	101	202	101	102	404	404	303	202	204	303	303	102	204	204	404	204	202	101
16LV_242	*	404	103	202	101	404	202	103	204	101	101	303	202	204	303	404	304	202	202	101	0	303	202	303	101	303	303	103	103	303	404	103	404	303	102	204	404	303	202	204	303	303	102	404	204	404	404	202	101
16LV_243	*	0	101	203	202	404	202	303	202	101	101	303	404	204	303	202	303	202	202	101	101	303	202	203	102	303	303	103	101	404	404	103	404	101	102	204	404	203	202	0	303	303	0	202	204	404	404	202	101
16LV_244	*	404	103	202	102	304	202	303	202	101	101	303	404	204	303	204	304	202	202	303	303	303	202	203	202	303	303	103	101	303	404	101	202	103	202	204	404	203	202	0	303	303	101	202	0	404	404	202	101
16LV_245	*	404	303	202	101	404	202	303	202	101	101	303	404	204	303	202	303	202	202	0	101	303	202	203	202	103	303	303	101	303	404	103	202	303	102	0	404	303	102	202	303	303	101	202	202	0	404	202	101
16LV_248	*	404	101	303	101	404	202	303	202	101	101	303	404	204	303	202	303	102	202	103	101	303	202	202	102	303	303	103	101	303	404	101	202	303	202	404	404	203	202	0	303	103	0	202	202	404	404	202	101
16LV_250	*	404	303	202	101	404	202	103	204	101	101	303	204	204	303	204	303	202	202	303	303	303	202	202	102	303	303	103	103	303	404	103	202	103	202	404	404	203	202	0	303	303	102	404	204	404	404	202	101
16LV_251	*	404	103	203	202	304	202	103	204	101	101	303	404	204	303	202	303	202	202	101	303	303	202	203	102	303	303	103	103	303	404	101	204	103	202	202	404	303	202	0	303	303	102	202	204	404	404	202	101
16LV_253	*	404	103	202	202	404	202	303	202	101	101	303	204	204	303	202	303	202	202	101	103	303	202	202	102	303	303	303	101	303	404	101	404	303	102	404	404	303	202	0	303	303	101	404	202	0	404	202	101
16LV_254	*	404	101	202	101	304	202	103	204	101	101	303	202	204	303	204	303	202	202	103	303	303	202	202	102	303	303	103	101	303	404	303	202	303	202	404	404	202	202	0	303	303	102	204	204	404	404	202	101
16LV_255	*	404	303	202	101	404	202	303	204	101	101	303	404	204	303	202	303	102	202	101	101	303	202	203	102	303	303	103	101	303	404	103	404	101	202	404	404	303	202	404	303	103	102	404	204	404	204	202	101
16LV_256	*	404	303	203	102	404	202	303	202	101	101	303	404	204	303	204	303	202	202	103	303	303	202	202	202	303	303	303	103	303	404	101	404	303	101	404	404	303	202	0	303	303	101	202	202	404	404	202	101
16LV_257	*	404	103	203	102	304	202	303	204	101	102	303	404	204	103	404	303	202	202	101	0	303	202	202	202	303	303	103	103	303	404	103	204	103	202	404	404	303	102	404	303	303	102	204	204	404	404	202	101
16LV_258	*	404	103	203	102	404	202	303	204	101	101	303	404	204	103	202	303	202	202	101	103	303	202	202	101	303	303	103	101	303	404	103	204	303	202	404	404	203	202	404	303	303	102	202	204	404	404	202	101
16LV_259	*	404	103	203	202	304	202	103	204	101	202	303	404	204	103	202	303	202	202	101	303	303	202	203	102	103	303	103	103	303	404	103	202	303	202	404	404	303	202	404	303	303	202	204	0	404	204	202	101
16LV_260	*	404	103	202	101	304	202	103	204	101	101	303	404	204	303	202	303	102	202	101	101	303	202	203	101	103	303	103	103	303	404	101	202	101	102	204	404	303	202	204	103	303	102	202	204	404	204	202	101
16LV_262	*	404	303	203	101	404	202	303	204	101	202	303	204	204	103	404	303	202	202	101	101	303	202	203	102	103	303	103	103	303	404	103	204	303	0	404	404	303	202	0	303	103	102	204	0	404	404	202	101
16LV_263	*	304	303	303	101	304	202	103	204	101	101	303	204	204	303	202	303	102	204	103	101	303	202	203	0	303	303	103	303	304	404	103	202	103	202	404	404	303	202	0	303	103	102	202	204	404	404	202	101
16LV_264	*	404	303	202	202	404	202	303	204	101	202	303	204	204	303	202	303	102	202	101	101	303	202	303	101	303	303	101	103	303	404	101	202	303	102	404	404	303	202	0	303	303	102	204	204	404	404	202	101
16LV_265	*	404	103	203	102	404	202	303	204	101	101	0	204	204	303	204	303	202	202	103	103	303	202	203	101	103	303	103	101	303	404	103	202	303	101	204	404	203	202	202	303	303	102	204	204	404	404	202	101
16LV_266	*	0	103	203	102	304	202	103	204	101	102	303	204	204	103	202	303	102	202	101	101	303	202	203	102	303	303	103	103	303	404	103	202	103	0	404	404	303	202	202	103	303	102	204	204	404	204	202	101
16LV_267	*	404	303	202	102	404	202	303	202	0	202	303	404	204	303	204	303	202	202	101	101	303	202	202	101	303	303	101	103	303	404	101	202	103	202	404	404	303	202	404	303	303	101	204	202	0	204	202	101
16LV_268	*	404	101	203	102	404	202	303	204	101	101	303	202	204	303	204	303	202	204	103	101	303	202	202	101	303	303	103	303	303	404	101	204	303	202	404	404	203	202	404	303	103	102	204	204	404	202	202	101
16LV_269	*	404	103	202	202	304	202	103	204	101	101	303	204	204	303	204	303	202	202	101	0	303	202	303	102	303	303	103	101	303	404	103	404	103	102	404	404	203	202	404	303	303	102	204	204	404	404	202	101
16LV_270	*	404	103	202	101	304	202	303	204	101	101	303	404	204	303	204	303	102	202	103	101	303	202	202	102	103	303	103	103	304	404	101	202	101	202	204	404	303	202	0	303	303	102	204	204	404	404	202	101
16LV_271	*	304	101	202	202	404	202	303	202	101	202	303	404	204	303	202	303	202	202	0	101	303	202	203	101	303	303	303	103	303	404	101	202	103	102	404	404	303	202	0	303	103	101	202	202	0	404	202	101
16LV_272	*	404	303	202	202	404	202	303	204	101	101	303	204	204	303	204	303	202	202	101	0	303	202	203	101	303	303	101	101	303	404	101	202	103	202	404	404	303	202	0	303	303	102	204	204	404	404	204	101
16LV_273	*	404	303	303	101	404	202	303	204	101	101	303	204	204	303	202	303	102	202	103	101	303	202	202	202	101	303	103	303	304	404	103	202	303	202	202	404	303	202	204	303	303	102	204	404	404	404	202	101
16LV_274	*	404	303	202	101	304	202	303	204	101	102	303	404	204	303	202	303	202	202	103	101	303	202	203	102	103	303	103	103	303	404	101	202	103	102	404	404	203	202	404	303	303	102	202	204	404	404	202	101
16LV_275	*	303	103	303	101	404	202	303	204	101	102	303	404	204	303	204	303	202	202	303	103	303	202	202	101	303	303	103	103	303	404	101	204	303	202	204	404	303	202	202	303	103	202	202	204	404	404	202	101
16LV_276	*	404	103	202	101	404	202	303	204	101	101	303	404	204	303	202	303	202	202	101	101	303	202	202	101	303	303	103	101	303	404	303	202	103	202	404	404	303	202	204	303	303	102	404	204	404	204	202	101
16LV_277	*	404	103	202	202	404	202	303	202	101	202	303	202	204	303	202	303	102	202	103	0	303	202	203	101	103	303	0	303	303	404	103	204	101	202	204	404	203	202	0	303	303	101	202	0	404	404	202	101
16LV_278	*	404	303	202	202	304	202	303	204	101	102	303	404	204	303	404	303	202	204	103	103	303	202	203	102	303	303	103	103	303	404	103	204	101	202	204	0	303	202	404	303	303	102	204	204	404	204	202	101
16LV_279	*	404	103	202	202	404	202	303	204	101	101	303	404	204	303	202	303	202	202	101	101	303	202	202	101	103	303	103	101	303	404	101	202	103	202	404	404	303	202	404	303	103	102	204	204	404	204	202	101
16LV_280	*	404	101	303	102	404	202	103	204	101	101	303	404	204	303	202	303	202	202	101	101	303	202	303	202	303	303	103	103	303	404	303	0	103	102	204	404	203	202	0	303	303	102	202	204	404	404	202	101
16LV_281	*	404	103	202	101	304	202	303	204	101	102	303	404	204	303	204	303	202	202	101	101	303	202	303	102	303	303	103	103	303	404	101	202	303	202	404	404	203	202	404	303	103	102	202	204	404	202	202	101
16LV_282	*	404	303	202	102	404	202	303	204	101	102	303	404	204	303	204	303	202	202	101	303	303	202	203	101	103	303	103	101	303	404	103	204	103	202	404	404	303	202	404	303	103	101	204	204	404	404	204	101
16LV_283	*	404	103	202	102	404	202	303	204	101	202	303	202	204	303	202	303	202	204	101	101	303	202	203	101	101	303	103	103	303	404	101	202	101	102	404	404	203	202	204	303	103	102	202	204	404	204	202	101
16LV_284	*	404	103	202	202	304	202	303	404	101	101	303	404	204	303	204	304	202	404	101	101	303	202	202	101	303	303	103	103	303	404	101	202	303	202	404	404	203	202	202	303	303	102	204	204	404	404	202	101
16LV_285	*	404	303	202	202	404	202	303	204	101	101	303	204	204	101	204	303	202	404	101	101	303	202	202	101	103	303	103	101	303	404	303	404	103	202	404	404	303	102	0	303	303	102	404	204	404	404	202	101
16LV_286	*	404	103	202	202	404	202	103	204	101	101	303	202	204	303	202	303	202	202	303	101	303	202	203	101	303	303	103	101	303	404	103	404	303	202	404	404	303	202	404	303	303	102	202	204	404	404	202	101
16LV_288	*	404	303	202	101	404	202	103	204	101	102	303	404	204	303	204	303	202	204	101	0	303	202	202	102	103	303	103	101	303	404	101	202	103	202	404	404	203	202	404	303	303	102	404	204	404	404	202	101
16LV_289	*	404	303	303	102	404	202	303	204	101	102	303	202	204	303	202	303	202	202	101	0	303	202	203	202	303	303	103	103	303	404	101	204	0	102	404	404	303	202	0	303	303	202	202	204	404	404	202	101
16LV_290	*	404	303	202	202	304	202	303	204	101	101	303	404	204	303	204	303	202	202	101	101	303	202	203	202	103	303	103	103	303	404	103	202	303	102	204	404	303	202	204	303	303	202	202	204	404	404	202	101
16LV_291	*	404	101	202	202	404	202	303	204	101	102	303	404	204	303	202	303	202	204	103	101	303	202	303	102	103	303	103	303	303	404	103	202	303	102	404	404	303	202	0	303	101	202	204	204	404	204	204	101
16LV_292	*	404	101	202	101	404	202	303	204	101	202	303	404	204	303	404	303	202	202	103	101	303	202	202	101	303	303	103	101	304	404	101	202	303	102	404	404	303	202	204	303	303	102	404	204	404	404	202	101
16LV_293	*	404	103	203	101	404	202	303	204	101	101	303	404	204	303	204	303	202	202	101	101	303	202	303	101	303	303	103	101	303	404	103	204	303	202	204	404	303	202	204	303	303	102	202	204	404	204	202	101
16LV_294	*	404	303	202	102	304	202	103	204	101	102	303	404	204	303	204	303	202	202	101	103	303	202	202	101	103	303	101	101	303	404	101	404	101	202	204	404	202	202	0	303	303	102	202	204	404	404	202	101
16LV_295	*	404	101	0	102	404	202	303	202	101	101	303	404	204	303	202	303	202	202	0	101	303	202	203	102	303	303	303	101	0	404	303	404	303	202	404	404	303	102	202	303	303	101	202	202	0	404	202	101
16LV_296	*	404	101	202	102	404	202	303	204	101	101	303	404	204	303	204	303	202	202	101	101	303	202	303	101	103	303	103	103	303	404	103	202	303	202	204	404	303	202	0	303	303	102	204	204	404	204	202	101
16LV_297	*	404	103	202	102	304	202	303	204	101	101	303	404	204	303	204	303	202	204	101	101	303	202	203	102	303	303	103	103	303	404	101	202	103	202	204	404	202	202	0	303	303	102	404	204	404	404	202	101
16LV_298	*	404	303	202	102	304	202	303	204	101	101	303	404	204	303	204	303	202	202	101	101	303	202	203	202	103	303	103	103	303	404	103	202	303	102	204	404	303	202	204	303	303	202	202	204	404	404	202	101
16LV_299	*	404	103	203	102	404	202	303	204	101	101	303	204	204	303	204	303	102	202	101	0	303	202	202	101	103	303	103	103	303	404	103	202	103	202	202	404	303	202	404	303	303	102	202	204	404	204	202	101
16LV_300	*	404	101	202	101	404	202	103	0	101	101	303	204	204	303	204	303	202	202	303	103	303	202	202	101	303	303	103	303	303	404	103	202	303	202	202	404	203	202	404	303	303	102	202	204	404	404	204	101
16LV_301	*	404	101	202	101	304	202	303	204	101	101	303	404	204	303	204	303	202	202	101	303	303	202	303	102	303	303	103	101	404	404	103	404	303	202	204	404	303	202	204	303	303	102	204	204	404	404	202	101
16LV_303	*	404	303	203	101	304	202	303	204	101	101	303	204	204	303	204	303	202	202	101	101	303	202	202	101	103	303	103	101	303	404	101	202	303	202	404	0	203	202	202	303	303	0	204	204	404	404	202	101
16LV_304	*	404	303	203	202	404	202	303	204	101	101	303	404	204	303	404	304	202	202	101	101	303	202	202	102	103	303	103	101	404	404	101	202	101	202	204	404	303	202	0	303	303	102	202	204	404	404	202	101
16LV_305	*	404	101	202	101	304	202	303	204	101	101	303	404	204	103	204	303	202	204	101	103	303	202	203	102	303	303	103	103	303	404	101	202	303	202	404	404	303	202	404	103	303	102	202	204	404	204	202	101
16LV_306	*	404	103	203	102	404	202	103	204	101	101	303	204	204	303	202	303	102	202	103	101	303	202	203	102	303	303	103	103	303	404	101	204	103	202	404	404	303	202	202	303	303	102	204	204	404	404	202	101
16LV_307	*	404	103	202	102	304	202	303	204	101	101	303	404	204	303	202	303	102	202	101	101	303	202	202	102	103	303	103	103	304	404	303	404	101	202	204	404	303	202	204	303	303	102	204	204	204	404	202	101
16LV_308	*	404	101	202	202	304	202	303	204	101	101	303	404	204	303	202	303	202	202	101	101	303	202	202	102	103	303	103	101	303	404	101	202	103	0	404	404	303	202	204	303	303	102	202	204	204	404	204	101
16LV_309	*	404	103	203	101	304	202	303	204	101	202	303	204	204	303	204	303	202	204	101	101	303	202	202	102	303	303	103	303	303	404	103	404	103	202	404	404	203	202	404	303	303	102	202	204	404	204	202	101
16LV_311	*	404	103	202	102	404	202	303	202	101	101	303	202	204	303	202	303	202	202	0	303	303	202	202	101	303	303	303	101	0	404	0	202	103	101	0	404	203	202	404	303	0	101	202	202	202	404	202	101
16LV_312	*	404	103	202	101	404	202	303	202	101	202	303	204	204	303	202	304	102	202	0	103	303	202	202	101	103	303	303	101	0	404	101	202	303	202	404	404	203	202	0	303	0	101	202	202	404	404	202	101
16LV_313	*	404	303	202	101	404	202	303	204	101	101	303	404	204	303	202	303	102	202	101	101	303	202	202	101	103	303	103	101	304	404	303	202	103	202	404	404	203	202	404	303	303	102	204	204	404	404	202	101
16LV_314	*	0	103	202	101	404	202	103	204	101	102	303	404	204	303	204	303	202	204	101	101	303	202	202	101	103	303	103	101	404	404	101	404	103	202	404	404	303	202	204	303	303	102	204	204	404	404	202	101
16LV_315	*	404	103	202	101	404	202	303	204	101	102	303	404	204	303	204	303	102	202	101	101	303	202	203	102	303	303	101	303	303	404	101	404	103	202	204	404	303	202	204	303	101	102	202	204	0	204	202	101
16LV_316	*	404	101	202	101	304	202	303	204	101	101	303	404	204	103	204	303	202	202	101	103	303	202	303	102	103	303	103	103	303	404	101	204	303	202	204	404	303	202	0	303	303	102	204	204	404	404	202	101
16LV_317	*	404	303	203	202	304	202	303	204	101	101	303	404	204	303	204	303	202	202	103	103	303	202	203	102	303	303	103	101	404	404	101	204	103	202	404	404	303	202	404	303	303	102	202	204	404	202	202	101
16LV_318	*	404	103	202	102	404	202	303	204	101	101	303	202	204	103	202	303	202	202	101	101	303	202	203	202	103	303	103	103	303	404	101	404	103	202	404	404	303	202	0	303	303	102	202	204	404	404	202	101
16LV_319	*	404	103	202	101	304	202	103	204	101	101	303	202	204	103	202	303	202	202	101	101	303	202	203	102	103	303	103	101	303	404	101	404	303	202	202	404	303	202	404	303	103	102	204	204	404	404	202	101
16LV_320	*	404	103	202	102	304	202	303	204	101	101	303	404	204	303	404	303	202	202	101	101	303	202	203	101	303	303	103	101	304	404	101	202	103	102	204	404	303	202	202	303	303	102	202	204	404	404	202	101
16LV_321	*	404	103	202	202	404	202	303	204	101	101	303	204	204	303	202	303	202	202	101	0	303	202	202	102	103	303	103	103	303	404	101	404	101	202	404	404	203	202	204	303	303	102	202	404	404	404	202	101
16LV_322	*	404	103	202	101	404	202	303	204	101	101	303	204	204	303	202	303	202	404	101	303	303	202	202	101	303	303	103	101	303	404	101	202	303	202	204	404	303	202	404	303	303	102	202	204	404	404	202	101
16LV_323	*	404	303	202	102	304	202	303	204	101	101	303	204	204	303	202	304	202	202	101	101	303	202	203	101	103	303	101	103	303	404	103	204	103	202	204	404	303	202	204	303	303	102	204	204	0	404	202	101
16RS_326	*	404	103	203	202	304	202	303	204	101	101	303	204	404	103	404	303	202	202	101	101	303	202	303	202	303	303	303	103	303	404	103	202	303	202	202	404	203	202	202	303	303	102	404	204	404	404	204	101
16RS_327	*	404	103	203	101	404	202	303	204	101	102	303	404	202	103	204	303	202	202	101	101	303	202	203	102	103	303	303	101	303	404	103	204	303	202	204	404	303	202	??	303	303	101	204	??	204	204	204	101
16RS_441	*	404	103	202	101	404	204	303	204	101	101	303	404	202	103	202	303	202	202	101	101	303	202	202	102	103	303	303	101	303	404	101	404	303	202	204	404	203	202	404	303	303	102	202	204	204	404	204	101
16RS_442	*	404	103	203	102	303	202	303	204	101	101	303	204	204	101	204	303	202	202	101	??	303	202	203	102	303	303	103	103	304	404	101	202	103	202	204	404	303	202	404	303	103	102	202	404	404	204	204	101
16RS_443	*	404	103	202	101	304	202	303	204	101	??	303	404	202	101	202	303	202	202	101	103	303	202	202	101	103	303	103	103	303	404	101	204	101	202	404	404	303	202	204	303	303	102	202	204	204	204	204	101
16RS_444	*	404	303	203	101	303	202	303	204	101	102	303	404	202	101	202	303	102	202	101	101	303	202	203	101	303	303	103	101	303	404	303	202	303	102	404	404	203	202	202	??	303	202	404	204	404	202	204	101
16RS_445	*	404	103	202	102	404	202	303	204	101	101	303	404	204	103	204	303	202	202	101	101	303	202	203	101	103	303	303	101	304	404	101	404	303	202	204	404	303	202	204	303	303	102	202	204	404	204	404	101
16RS_447	*	404	103	203	202	404	204	303	204	101	101	303	404	404	303	202	303	202	202	103	303	303	202	203	101	303	303	303	103	304	404	101	204	103	102	204	404	203	102	404	303	303	102	202	204	404	404	204	101
16RS_448	*	304	103	303	101	304	202	303	204	101	202	303	404	202	103	404	303	202	404	103	101	303	202	202	202	303	303	101	103	303	404	101	202	303	202	204	404	303	202	202	??	303	102	202	204	404	404	204	101
16RS_449	*	404	103	202	102	404	204	303	204	101	101	303	204	204	303	202	303	202	202	101	303	303	202	202	101	303	303	303	103	303	404	103	202	103	101	404	404	303	202	204	303	303	102	204	204	404	404	204	101
16RS_450	*	404	303	202	101	404	204	303	204	101	102	303	404	202	103	202	303	202	202	101	101	303	202	303	101	303	303	303	103	303	404	101	202	303	202	204	404	203	202	404	303	303	102	404	204	404	204	204	101
16RS_451	*	404	101	202	101	404	404	303	204	101	101	303	204	202	101	202	304	102	404	101	103	303	202	203	202	303	303	303	101	303	404	101	404	303	101	404	404	203	202	404	303	303	102	204	204	404	204	204	101
16RS_452	*	404	103	303	102	404	204	303	202	??	102	303	404	204	101	204	303	102	202	101	101	303	??	303	102	303	303	303	103	303	404	101	202	101	202	404	404	203	202	204	303	303	101	202	404	404	404	202	101
16RS_453	*	404	303	202	202	303	202	303	204	101	??	303	204	404	101	204	303	102	202	101	303	303	202	203	102	303	303	303	101	303	404	101	202	303	101	204	404	303	202	204	103	303	102	204	204	404	404	204	101
16RS_455	*	404	103	203	202	304	202	103	404	101	101	303	202	404	103	204	303	202	202	101	303	303	202	202	101	103	303	103	101	304	404	103	204	303	101	404	404	303	202	404	303	101	102	204	204	404	404	204	101
16RS_456	*	404	103	202	202	404	202	303	204	101	??	303	204	404	101	202	303	202	202	101	101	303	202	203	102	303	303	303	103	303	404	103	??	103	202	204	404	303	202	404	303	103	102	202	204	404	404	204	101
16RS_457	*	404	103	203	102	404	202	303	204	101	202	303	404	204	103	202	303	202	202	101	103	303	202	202	102	103	303	303	103	303	404	103	202	101	202	204	404	203	202	204	303	101	102	202	204	404	404	204	101
16RS_458	*	404	303	202	102	404	202	303	204	101	102	303	204	204	101	204	303	202	202	103	303	303	202	202	102	303	303	303	103	303	404	303	204	103	101	404	404	203	202	202	303	103	102	202	204	404	404	404	101
16RS_459	*	404	101	203	101	304	204	303	204	101	101	303	204	202	103	202	303	202	202	103	103	303	202	203	102	103	303	303	103	303	404	101	??	303	202	404	404	303	202	202	103	103	102	202	204	404	204	204	101
16RS_460	*	404	103	202	101	304	202	303	204	101	101	303	204	202	103	204	303	102	202	103	103	303	202	203	102	103	303	303	101	304	404	101	204	303	202	204	404	303	202	204	303	303	102	404	204	404	404	204	101
16RS_461	*	404	103	203	202	404	202	303	204	101	102	303	404	404	103	202	303	202	202	101	303	303	202	203	101	103	303	303	103	303	404	101	202	103	102	204	404	303	202	202	303	303	102	204	204	404	404	204	101
16RS_462	*	404	103	203	101	404	202	303	204	101	101	303	404	202	101	202	303	102	404	101	101	303	202	303	101	101	303	303	101	304	404	101	202	101	202	404	404	303	202	202	303	303	101	202	204	404	204	??	101
16RS_463	*	404	103	203	101	404	404	303	204	101	101	303	204	202	101	204	303	202	202	103	103	303	202	202	102	103	303	303	101	304	404	101	202	103	102	204	404	202	202	404	303	303	102	204	204	204	202	204	101
16RS_464	*	404	103	202	101	303	202	103	204	101	101	303	204	202	103	202	304	102	202	101	101	303	202	303	102	103	303	303	103	304	404	103	202	103	202	202	404	203	202	204	103	303	102	202	204	404	404	204	101
16RS_465	*	404	103	202	101	404	202	303	204	101	101	303	404	202	101	404	303	101	202	101	101	303	202	202	102	303	303	303	101	303	404	103	404	303	202	204	404	203	202	204	303	303	102	404	204	404	204	204	101
16RS_465-1	*	404	303	202	102	303	202	303	204	101	101	303	204	204	103	202	303	202	202	101	101	303	202	203	101	103	303	303	101	303	404	103	202	101	202	204	404	203	202	404	303	303	102	204	204	404	404	204	101
16RS_465-2	*	??	101	203	202	303	202	103	204	101	101	303	204	404	103	204	303	202	202	103	101	303	202	303	102	103	303	303	103	303	404	101	??	103	101	404	404	303	202	202	303	103	102	202	204	404	404	204	101
16RS_465-3	*	404	101	202	102	404	204	303	204	101	??	303	404	204	103	202	304	101	202	101	101	303	202	202	202	103	303	303	103	303	404	101	204	101	102	404	404	303	202	404	303	303	102	404	204	404	404	204	101
16RS_465-4	*	404	303	202	101	304	204	303	204	101	101	303	404	202	303	202	303	202	404	303	101	303	202	202	101	303	303	303	103	303	404	103	202	103	102	204	404	303	202	204	303	303	102	202	204	404	404	204	101
16RS_465-5	*	404	103	202	202	303	204	303	204	101	101	303	404	404	103	202	303	102	202	101	101	303	202	202	101	303	303	303	101	303	404	101	202	103	202	404	404	303	202	202	303	303	102	202	204	404	404	204	101
16RS_465-6	*	404	101	202	102	304	204	303	204	101	101	303	204	204	103	204	303	202	202	101	101	303	202	303	101	101	303	303	103	303	404	101	202	103	101	404	404	203	202	204	303	303	102	202	204	404	404	204	101
16RS_465-7	*	404	303	202	202	404	202	103	204	101	??	303	404	404	103	202	303	202	202	101	101	303	202	203	101	303	303	303	101	303	404	103	202	103	202	204	404	203	202	202	303	303	102	404	204	404	204	204	101
16RS_465-8	*	404	103	303	101	304	202	303	204	101	101	303	404	202	101	204	303	202	202	101	101	303	202	203	101	303	303	303	101	304	404	103	202	303	202	404	404	303	202	204	303	303	102	202	204	404	404	204	101
16RS_465-9	*	404	303	203	102	404	202	303	204	101	102	303	204	204	101	202	303	202	202	101	101	303	202	203	102	103	303	303	103	303	404	103	202	303	101	404	404	303	202	404	303	103	102	204	204	404	404	204	101
16RS_465-10	*	404	303	203	101	404	202	303	204	101	101	303	404	202	101	202	304	202	202	103	103	303	202	203	102	303	303	303	103	303	404	101	202	303	202	404	404	303	202	204	303	303	102	204	204	404	404	204	101
16RS_465-11	*	404	101	203	101	303	202	103	204	101	101	303	404	202	103	204	303	202	202	103	101	303	202	202	102	303	303	303	303	303	404	101	204	103	202	204	404	303	202	204	303	103	??	404	??	404	404	204	101
16RS_465-12	*	404	103	202	102	404	204	303	204	101	101	303	404	204	303	202	304	202	202	103	101	303	202	202	101	303	303	303	101	303	404	303	404	103	202	404	404	303	202	404	303	103	101	204	??	404	404	204	101
16RS_465-13	*	404	303	203	202	404	202	303	204	101	202	303	404	404	303	202	303	102	202	103	101	303	202	303	101	303	303	303	103	303	404	101	202	103	102	404	404	303	202	404	303	303	102	204	204	404	404	204	101
16RS_465-14	*	404	103	203	102	404	404	303	204	101	202	303	404	204	101	202	303	202	202	101	??	303	202	303	102	103	303	303	103	303	404	101	202	303	101	404	404	203	202	404	303	303	102	404	204	404	404	204	101
16RS_465-15	*	404	303	203	102	404	202	303	204	101	101	303	204	204	103	204	303	202	202	101	101	303	202	202	102	103	303	303	103	303	404	103	202	303	202	204	404	303	102	204	303	303	102	204	204	404	404	204	101
16RS_465-16	*	404	303	202	202	404	202	303	204	101	102	303	204	404	103	204	303	202	404	101	303	303	202	203	101	103	303	303	101	303	404	103	202	101	202	204	404	303	202	202	303	303	102	204	204	404	404	204	101
16RS_465-17	*	404	303	203	101	303	202	303	404	101	101	303	204	202	103	204	303	202	404	101	??	303	202	202	101	103	303	303	103	404	404	101	202	101	202	404	404	203	202	404	303	303	101	404	202	404	404	202	101
16RS_465-18	*	404	303	202	102	404	202	103	204	101	101	303	404	204	103	204	303	202	202	101	101	303	202	202	102	103	303	303	103	303	404	101	204	103	202	404	404	203	202	204	303	103	102	404	204	404	404	204	101
16RS_465-19	*	404	303	203	101	404	202	303	204	101	101	303	404	202	103	202	303	202	202	101	101	303	202	203	102	103	303	303	101	304	404	101	202	303	202	204	404	203	202	404	303	303	102	202	204	404	202	204	101
16RS_465-20	*	404	103	303	202	304	202	303	404	101	101	303	404	404	101	204	303	202	202	103	101	303	202	203	102	303	303	303	101	303	404	??	404	103	202	204	404	203	202	204	303	303	102	204	204	404	204	204	101
16RS_465-22	*	404	303	303	101	404	204	303	202	101	101	303	404	202	103	204	304	202	202	101	101	303	202	202	102	103	303	303	103	303	404	103	202	103	202	204	404	203	202	204	303	103	101	204	202	404	404	202	101
16RS_465-23	*	404	303	203	101	304	204	103	204	101	101	303	404	202	303	204	303	202	202	101	303	303	202	202	101	303	303	303	101	303	404	101	202	103	202	202	404	303	202	204	303	303	102	202	204	404	404	204	101
16RS_465-24	*	404	303	203	202	304	202	303	204	101	??	303	204	404	101	204	303	202	202	101	103	303	202	202	101	103	303	303	101	404	404	303	404	101	102	404	404	202	202	202	303	103	102	204	204	404	404	204	101
16RS_465-25	*	404	303	203	101	404	202	303	204	101	101	303	404	202	303	202	404	202	404	101	101	303	202	202	101	303	303	303	101	303	404	303	202	103	202	404	404	303	202	202	303	103	202	202	204	404	204	204	101
16RS_465-26	*	304	101	203	102	304	202	303	204	101	101	303	204	204	303	204	303	202	202	101	101	303	202	203	202	303	303	303	103	304	404	101	202	101	202	204	404	303	202	204	303	303	102	202	204	404	204	204	101
16RS_465-27	*	404	103	203	101	304	202	303	204	101	101	303	404	202	303	202	303	202	202	303	101	303	202	202	101	303	303	303	103	304	404	303	??	103	102	404	404	303	102	204	303	103	102	202	204	404	204	204	101
16RS_465-29	*	404	103	202	102	304	202	303	204	101	??	303	404	204	103	202	303	202	404	101	101	303	202	203	102	303	303	303	101	304	404	103	204	103	102	404	404	303	202	204	303	303	102	202	204	404	404	204	101
16RS_465-31	*	404	303	203	102	304	204	303	204	101	102	303	204	204	103	204	303	202	202	101	101	303	202	202	102	303	303	303	303	303	404	303	202	303	202	204	404	203	202	404	303	303	102	204	204	404	404	204	101
16RS_465-32	*	404	103	203	102	404	202	303	204	101	101	303	204	204	103	202	303	102	202	101	103	303	202	202	101	303	303	303	103	303	404	103	404	103	202	404	404	203	202	204	303	303	102	202	204	404	204	204	101
16RS_465-37	*	404	303	203	202	404	204	303	204	101	202	??	204	404	101	202	304	102	202	303	101	303	202	203	101	303	303	303	101	303	404	101	202	303	202	404	404	??	202	204	303	103	102	204	204	404	404	204	101
16RS_465-38	*	404	303	202	102	404	202	303	204	101	101	303	404	204	103	202	303	202	202	103	101	303	202	202	101	103	303	303	101	303	404	103	??	103	202	204	404	203	202	202	303	303	102	202	204	202	204	204	101
16RS_465-39	*	304	103	202	202	404	202	303	204	101	101	303	204	404	103	204	303	202	404	103	101	303	202	203	101	303	303	303	101	304	404	101	202	303	??	404	404	303	202	404	303	103	102	204	204	404	204	204	101
16RS_465-40	*	404	103	202	101	404	202	303	204	101	101	303	204	202	103	404	303	202	202	101	303	303	202	203	102	101	303	303	101	303	404	103	202	103	202	404	404	203	202	404	303	303	202	202	204	404	204	204	101
16RS_465-41	*	404	103	202	102	304	204	303	204	101	101	303	404	204	303	202	304	202	202	101	??	303	202	203	101	303	303	303	103	303	404	101	204	103	202	204	404	303	202	204	303	303	102	??	204	404	204	204	101
16RS_465-42	*	404	101	203	102	404	202	303	204	101	102	303	404	204	303	404	303	202	202	103	101	303	202	203	101	103	303	303	101	303	404	103	202	303	202	404	404	303	102	404	303	303	102	204	204	404	404	204	101
16RS_465-43	*	404	101	303	202	404	202	303	202	101	101	303	404	404	103	202	303	202	202	101	101	303	202	203	101	103	303	103	103	303	404	103	202	101	202	404	404	303	102	204	303	303	101	??	202	404	204	202	101
16RS_465-45	*	404	303	202	101	404	202	303	202	101	101	303	204	202	303	204	303	202	404	101	103	303	202	202	202	303	303	303	103	??	404	103	404	303	202	404	404	203	202	202	303	303	101	204	202	404	202	202	101
16RS_465-46	*	404	103	203	202	404	202	303	204	101	??	303	204	404	303	202	303	202	404	101	??	303	202	202	102	103	303	303	101	304	404	303	??	303	102	404	404	303	202	204	303	303	102	204	204	404	404	204	101
16RS_465-47	*	404	103	203	202	404	202	303	204	101	??	303	202	404	103	202	303	202	202	101	101	303	202	203	102	103	303	303	101	303	404	101	202	103	202	404	404	203	202	202	303	103	102	202	204	404	404	204	101
16RS_465-48	*	404	103	202	102	404	204	303	204	101	202	303	204	204	103	202	303	102	204	101	303	303	202	202	101	303	303	303	101	304	404	101	204	303	202	204	404	303	202	204	303	303	102	202	204	404	404	204	101
16RS_465-49	*	404	103	303	202	303	202	303	204	101	101	303	404	404	103	202	303	202	202	103	303	303	202	202	102	303	303	303	101	404	404	303	202	303	202	204	404	303	202	204	303	303	102	204	202	404	404	204	101
16RS_465-50	*	404	103	203	101	304	202	303	204	101	101	303	404	202	303	202	303	102	202	101	303	303	202	203	101	303	303	303	101	303	404	103	204	103	102	404	404	303	202	204	303	303	102	204	204	404	204	204	101
16RS_465-51	*	404	103	203	202	304	202	303	204	101	101	303	404	404	303	204	303	202	202	101	103	303	202	202	101	303	303	303	103	303	404	103	??	303	202	204	404	203	202	204	303	303	102	202	204	204	404	204	101
16RS_465-52	*	404	103	203	102	404	204	103	204	101	101	303	204	204	303	202	304	202	202	101	101	303	202	203	101	303	303	303	103	303	404	103	202	101	101	204	404	303	202	404	303	103	102	202	204	404	404	204	101
16RS_465-53	*	404	303	202	102	304	202	303	204	101	101	303	202	204	103	202	303	202	202	101	101	303	202	202	101	303	303	103	101	303	404	103	202	303	202	404	404	203	202	202	??	303	102	202	204	404	404	204	101
16RS_465-54	*	404	303	203	101	304	204	303	204	101	101	303	204	202	103	204	304	202	202	101	??	303	202	202	101	303	303	103	103	404	404	101	204	103	202	204	404	203	202	204	303	303	102	202	204	404	404	204	101
16RS_465-55	*	404	303	203	101	404	202	303	204	101	102	303	204	202	103	204	303	202	202	101	101	303	202	203	101	103	303	303	103	303	404	101	202	103	202	404	404	303	202	202	303	303	102	204	204	404	404	204	101
16RS_465-56	*	404	103	202	202	404	204	303	204	101	101	303	404	404	101	404	303	202	202	101	101	303	202	202	101	103	303	303	303	303	404	103	202	303	102	404	404	203	202	202	303	103	102	204	204	404	404	204	101
16RS_465-57	*	404	303	202	101	304	202	303	204	101	101	303	404	202	103	204	303	202	202	103	103	303	202	202	102	303	303	303	103	303	404	103	404	103	202	404	404	203	202	204	303	103	102	204	204	404	404	204	101
16RS_465-58	*	404	303	202	102	304	204	303	204	101	202	303	204	204	101	202	303	102	202	101	101	303	202	202	101	103	303	303	103	303	404	103	202	103	102	404	404	203	202	404	303	303	102	404	204	404	404	204	101
16RS_465-59	*	304	103	203	102	404	202	303	204	101	101	303	404	204	103	404	304	202	202	303	101	303	202	202	101	303	303	303	101	303	404	101	204	103	102	404	404	303	102	404	303	103	102	202	204	404	404	204	101
16RS_465-60	*	404	303	202	102	303	204	303	204	101	102	303	404	204	101	404	303	202	202	101	??	303	202	202	101	303	303	303	103	404	404	101	204	103	101	404	404	303	202	202	303	303	102	202	204	404	404	204	101
16RS_465-61	*	404	103	202	101	404	202	303	204	101	101	303	404	202	303	204	303	202	202	101	303	303	202	202	202	303	303	303	101	404	404	101	202	303	202	204	404	303	202	202	303	303	102	204	204	404	202	204	101
16RS_465-62	*	404	103	203	101	303	202	303	204	101	101	303	404	202	103	202	303	202	202	103	101	303	202	203	102	303	303	303	303	303	404	101	202	103	202	204	404	303	202	204	303	303	102	404	204	404	404	204	101
16RS_465-64	*	404	103	203	102	404	202	303	204	101	202	303	404	204	103	204	303	202	202	101	103	303	202	202	102	303	303	303	103	303	404	103	202	103	102	204	404	303	202	404	303	303	102	204	204	204	404	204	101
16RS_465-65	*	303	303	202	101	404	204	303	204	101	101	303	204	202	103	202	304	202	202	101	101	303	202	203	101	303	303	303	101	303	404	103	204	303	202	404	404	203	202	204	303	103	102	204	204	404	404	204	101
16RS_465-66	*	404	103	202	101	303	204	303	204	101	101	303	204	202	101	202	304	202	404	103	103	303	202	202	102	303	303	303	101	303	404	103	404	103	202	404	404	203	202	202	303	103	102	204	204	404	204	204	101
16RS_465-67	*	404	101	303	202	404	204	303	204	101	101	303	404	404	103	202	303	202	202	103	103	303	202	203	102	101	303	303	101	304	404	103	202	303	202	202	404	203	202	202	303	303	102	404	204	404	404	204	101
16RS_465-68	*	404	103	202	101	303	204	303	204	101	101	303	404	202	103	202	303	202	404	101	303	303	202	202	101	103	303	303	101	303	404	101	404	103	202	404	404	202	202	404	303	303	102	202	204	404	204	204	101
16RS_465-69	*	404	103	202	102	404	202	303	204	101	??	303	204	204	101	202	303	202	202	103	101	303	202	203	101	103	303	103	103	303	404	103	202	303	202	404	404	303	202	204	303	303	102	204	204	404	404	204	101
16RS_465-70	*	404	303	203	102	404	404	303	404	101	101	303	404	204	103	202	303	202	202	103	103	303	202	202	102	101	303	303	303	304	404	103	204	303	202	404	404	303	202	204	303	303	102	202	204	404	404	204	101
16RS_465-71	*	404	303	203	102	304	202	303	204	101	101	303	204	204	303	204	304	202	204	101	101	303	202	202	101	303	303	303	101	303	404	103	202	101	101	204	404	303	202	204	303	303	102	202	404	404	404	204	101
18LV_6135	*	404	303	203	101	404	202	303	204	101	101	303	404	204	101	202	303	202	202	101	101	303	202	203	101	303	303	303	101	303	404	101	202	103	202	204	404	303	202	404	303	103	102	204	202	404	204	204	103
18LV_6136	*	404	303	203	101	404	202	303	204	101	101	303	204	404	303	202	303	202	204	101	0	303	202	202	102	303	303	303	103	304	404	103	202	103	202	404	404	303	202	404	303	303	102	404	202	404	404	204	103
18LV_6137	*	404	303	202	101	303	204	303	204	101	102	303	404	202	101	202	303	102	202	101	303	303	202	202	102	303	303	303	303	304	404	101	404	103	102	202	404	203	202	204	303	303	102	202	202	404	404	204	103
18LV_6138	*	404	103	203	101	404	202	303	204	101	102	303	404	204	103	202	304	202	202	101	101	303	202	303	101	303	303	303	103	303	404	101	202	303	101	204	404	303	202	204	303	103	102	204	204	404	204	204	103
18LV_6139	*	404	303	203	101	304	202	303	204	101	101	303	404	204	101	202	303	202	202	101	101	303	202	203	202	303	303	303	101	304	404	103	202	303	202	204	404	303	202	404	303	303	102	202	202	404	204	204	103
18LV_6140	*	404	303	202	101	404	202	303	204	101	101	303	404	204	101	204	303	202	404	101	101	303	202	203	202	303	303	303	101	303	404	103	204	103	202	404	404	303	202	204	303	303	101	404	202	404	404	204	103
18LV_6141	*	404	103	303	101	404	202	303	204	101	101	303	404	404	303	202	303	202	202	303	101	303	202	203	101	303	303	103	103	303	404	103	204	303	102	404	404	303	202	202	303	303	102	204	202	404	204	204	103
18LV_6142	*	404	303	202	101	404	202	303	204	101	101	303	404	204	303	202	303	202	202	101	101	303	202	202	102	303	303	303	303	303	404	101	202	303	202	204	404	203	202	404	303	303	102	404	202	404	202	204	103
18LV_6143	*	404	303	202	101	304	202	303	204	101	102	303	204	204	303	202	303	202	202	101	103	303	202	203	102	103	303	303	101	304	404	303	202	103	101	404	404	303	202	204	303	103	102	204	202	404	404	204	0
18LV_6145	*	404	303	202	101	404	204	303	204	101	102	303	204	204	101	202	303	102	204	101	101	303	202	202	101	103	303	303	101	303	404	101	202	303	202	204	404	303	202	204	303	103	102	204	202	404	204	204	103
18LV_6146	*	404	303	203	101	404	202	303	204	101	101	303	204	404	103	202	303	202	204	101	101	303	202	203	101	103	303	303	303	303	404	103	202	101	202	204	404	203	202	204	303	303	102	202	202	404	404	204	103
18LV_6147	*	404	303	202	101	404	202	303	204	101	102	303	404	204	303	202	303	102	202	101	101	303	202	202	102	303	303	303	103	303	404	101	404	103	202	404	404	303	202	404	303	303	102	202	202	404	204	204	103
18LV_6148	*	404	303	202	101	404	202	303	204	101	101	303	204	204	101	202	304	102	202	101	0	303	202	202	101	303	303	303	303	404	404	101	404	303	102	404	404	303	202	204	303	303	102	204	202	404	404	204	103
18LV_6149	*	404	303	203	101	303	204	303	204	101	101	303	204	202	303	202	304	202	202	103	0	303	202	202	202	303	303	303	303	303	404	103	204	101	102	404	404	203	202	404	303	303	102	204	202	404	204	204	103
18LV_6150	*	404	103	203	101	304	202	303	204	101	0	303	204	202	101	202	303	102	202	103	101	303	202	202	101	303	303	303	103	304	404	103	204	101	102	404	404	202	202	204	303	103	102	202	202	204	404	204	103
18LV_6151	*	404	303	202	101	304	202	303	204	101	0	303	204	204	103	202	303	202	202	101	101	303	202	203	101	303	303	303	103	303	404	101	202	103	202	404	404	303	202	204	303	103	102	202	202	404	204	204	0
18LV_6152	*	304	103	202	101	404	202	303	204	101	202	303	204	404	101	202	303	202	202	101	101	303	202	202	102	303	303	303	103	303	404	101	202	103	202	404	404	303	202	204	303	303	102	204	202	404	404	204	103
18LV_6153	*	304	303	203	101	303	202	303	204	101	101	303	404	202	103	202	303	102	202	101	101	303	202	203	102	303	303	303	103	303	404	101	204	103	202	204	404	303	202	202	303	303	102	404	202	404	404	204	103
18LV_6154	*	404	303	203	101	404	202	303	204	101	101	303	404	204	101	202	303	202	202	101	101	303	202	203	102	303	303	303	103	303	404	103	202	101	202	404	404	203	202	204	303	101	102	204	202	404	404	204	103
18LV_6155	*	404	303	202	101	404	202	103	204	101	101	303	404	202	103	202	303	202	202	103	101	303	202	203	102	303	303	303	103	303	404	303	204	303	202	404	404	303	202	202	303	303	102	202	202	404	404	204	103
18LV_6156	*	404	303	202	101	404	202	303	204	101	202	303	404	0	303	202	304	202	202	101	101	303	202	202	101	103	303	303	103	304	404	303	202	303	202	404	404	303	202	404	303	103	102	204	202	404	404	204	103
18LV_6157	*	404	303	203	101	404	202	303	204	101	101	303	204	202	101	202	303	202	202	303	0	303	202	202	101	303	303	303	303	303	404	103	202	303	102	404	404	303	202	404	303	303	102	204	202	404	404	204	103
18LV_6158	*	404	303	202	101	404	202	303	204	101	101	303	404	404	101	202	303	202	202	101	101	303	202	203	101	303	303	303	103	303	404	101	204	303	202	204	404	303	202	404	303	303	102	404	202	404	404	204	103
18LV_6159	*	404	103	203	101	404	202	303	204	101	101	303	404	204	103	202	303	202	202	103	303	303	202	203	101	303	303	303	101	303	404	101	404	103	202	204	404	203	202	204	303	303	102	204	202	202	404	204	103
18LV_6160	*	404	303	202	101	404	204	303	204	101	101	303	404	204	101	202	303	202	202	103	0	303	202	202	101	103	303	303	101	303	404	101	204	103	101	204	404	203	202	404	303	303	102	202	202	404	404	204	103
18LV_6161	*	404	303	203	101	404	202	303	204	101	102	303	404	204	101	202	303	202	202	101	303	303	202	202	101	103	303	303	101	303	404	103	204	303	202	404	404	303	202	404	303	303	102	404	202	404	404	204	103
18LV_6162	*	404	303	203	101	304	202	103	202	101	101	303	202	204	103	202	404	102	204	101	101	303	0	202	101	303	303	103	103	303	404	101	204	103	202	404	404	202	202	0	303	103	101	202	202	0	404	202	101
18LV_6163	*	404	303	203	101	304	204	303	204	101	101	303	404	204	303	202	303	202	202	101	303	303	202	202	101	103	303	303	101	303	404	103	202	103	202	404	404	303	202	202	303	303	102	204	202	404	404	204	103
18LV_6164	*	404	303	203	101	404	202	303	204	101	101	303	404	204	101	202	303	202	202	101	101	303	202	203	102	103	303	303	101	303	404	101	202	303	202	202	404	303	202	204	303	303	202	204	202	404	404	204	103
18LV_6165	*	404	103	202	101	404	202	303	204	101	101	303	404	204	101	202	304	202	204	101	103	303	202	203	101	103	303	303	303	404	404	103	204	103	202	204	404	202	202	204	303	303	102	202	202	404	204	204	103
18LV_6166	*	404	303	202	101	404	202	303	204	101	101	303	204	202	103	202	304	102	202	101	101	303	202	202	101	303	303	303	101	303	404	103	204	303	102	202	404	303	202	404	303	101	102	202	202	404	404	204	101
18LV_6167	*	404	101	203	101	304	204	303	202	101	101	303	404	204	103	202	304	202	202	101	101	303	202	303	101	303	303	303	101	303	404	101	202	303	202	404	404	303	202	404	303	103	101	204	202	404	404	202	101
18LV_6168	*	304	303	303	101	404	204	303	204	101	101	0	202	202	103	202	303	202	204	101	103	303	202	203	102	303	303	303	103	303	404	101	202	103	101	202	404	303	202	404	303	103	102	204	202	204	404	204	103
18LV_6169	*	404	103	202	101	304	404	103	204	101	101	303	404	202	101	204	304	202	202	101	303	303	202	203	102	303	303	103	103	303	404	303	202	303	101	404	404	203	102	204	303	103	102	404	202	404	204	204	103
18LV_6171	*	404	101	202	101	404	202	303	202	101	101	303	404	204	101	202	303	202	202	0	101	303	0	203	202	303	303	303	303	303	404	103	204	303	202	204	404	303	202	202	303	303	101	202	202	0	204	202	101
18LV_6172	*	404	303	202	101	404	202	103	204	101	0	303	204	204	103	202	303	202	202	303	303	303	202	203	101	103	303	303	103	304	404	101	202	103	202	404	404	303	202	202	303	303	102	202	202	404	404	204	0
18LV_6173	*	404	303	202	101	304	202	303	204	101	101	303	404	202	103	202	303	202	202	103	101	303	202	202	101	303	303	303	103	303	404	103	202	103	202	404	404	303	202	404	303	303	101	404	202	404	404	204	101
18LV_6174	*	404	303	203	101	404	202	0	204	101	202	303	404	404	101	202	303	202	202	101	103	303	202	202	101	103	303	303	101	304	404	103	202	103	202	404	404	303	102	204	303	303	102	202	202	404	204	204	103
18LV_6175	*	304	303	203	101	404	202	303	202	101	101	303	404	204	303	202	303	202	202	101	0	303	202	202	101	303	303	303	101	303	404	103	404	103	202	404	404	202	202	404	303	303	101	202	202	404	404	202	101
18LV_6176	*	404	101	202	101	303	202	303	202	101	0	303	404	202	103	202	304	202	202	0	303	303	202	203	102	303	303	303	103	303	404	103	204	303	202	204	404	303	202	404	303	303	101	202	202	0	404	202	101
18LV_6177	*	404	103	303	101	303	204	303	204	101	101	303	204	202	103	202	303	102	202	101	103	303	202	203	101	303	303	303	303	304	404	101	202	103	102	204	404	203	202	204	303	303	102	404	202	404	202	204	103
18LV_6179	*	404	303	203	101	404	202	103	204	101	101	303	404	202	103	202	303	202	202	103	303	303	202	202	101	303	303	303	103	304	404	101	202	303	102	204	404	303	202	204	303	303	0	204	202	404	404	204	103
18LV_6180	*	404	103	203	101	304	202	303	204	101	102	303	404	204	103	202	303	202	202	101	101	303	202	303	101	303	303	303	103	303	404	103	204	101	202	204	404	303	202	404	303	103	102	204	202	404	204	204	103
18LV_6181	*	404	103	202	101	404	202	303	204	101	101	303	404	202	103	204	303	202	202	101	303	303	202	203	202	303	303	303	303	304	404	103	202	103	102	204	404	202	202	204	303	303	102	404	202	404	404	204	103
18LV_6182	*	0	303	203	101	404	202	103	204	101	101	303	204	404	101	202	303	202	202	303	101	303	202	203	202	103	303	303	101	303	404	101	202	303	202	204	404	303	202	404	303	303	102	204	202	404	404	204	103
18LV_6183	*	0	303	203	101	404	202	303	204	101	101	303	404	204	101	202	303	202	202	103	103	303	202	203	102	103	303	303	103	304	404	101	404	103	202	204	404	303	202	404	103	303	102	204	202	404	404	204	103
18LV_6184	*	404	303	202	101	404	204	303	204	101	101	303	404	204	103	202	303	202	204	103	101	303	202	203	101	103	303	303	101	304	404	303	202	303	202	202	404	303	202	202	303	303	102	204	202	404	204	404	103
18LV_6185	*	404	303	202	101	404	202	303	204	101	101	303	202	204	103	202	303	202	202	101	303	303	202	202	102	303	303	303	101	303	404	103	204	303	202	404	404	303	202	204	303	303	102	202	404	404	404	204	103
18LV_6186	*	404	101	202	101	404	202	303	202	101	202	303	202	202	303	202	303	202	202	0	103	303	0	202	101	103	303	303	101	303	404	101	204	103	202	404	404	303	202	204	303	103	101	202	202	0	404	202	101
18LV_6187	*	404	303	202	101	304	202	303	204	101	102	303	404	204	101	202	303	202	202	101	0	303	202	203	102	103	303	303	103	304	404	303	204	303	101	404	404	303	202	204	303	303	102	404	202	404	404	204	103
18LV_6188	*	404	303	303	101	404	204	303	204	101	101	303	204	204	101	202	303	202	204	103	101	303	202	202	101	303	303	303	101	303	404	101	204	103	202	404	404	203	202	404	303	303	102	404	202	204	204	204	103
18LV_6189	*	0	103	303	101	404	202	303	204	101	101	303	404	404	103	202	303	202	204	103	101	303	202	203	101	103	303	303	103	303	404	303	202	303	202	204	404	303	202	202	303	303	102	202	202	404	404	204	103
18LV_6190	*	404	103	203	101	304	202	303	204	101	101	303	204	202	103	202	303	102	202	101	103	303	202	203	102	303	303	303	101	304	404	103	202	303	202	404	404	203	202	204	303	303	102	204	202	404	204	204	103
18LV_6192	*	404	303	202	101	404	204	303	204	101	202	303	204	202	101	204	303	202	202	101	101	303	202	203	101	103	303	303	303	303	404	103	202	103	202	404	404	303	202	204	303	103	102	202	202	404	404	204	103
18LV_6193	*	404	303	202	101	303	202	303	202	101	101	303	0	202	101	202	303	202	202	101	0	303	202	303	202	103	303	103	103	303	404	101	202	103	102	404	404	303	202	204	303	303	101	202	202	0	204	202	101
18LV_6195	*	404	303	203	101	404	202	303	204	101	101	303	404	202	103	202	303	102	202	101	101	303	202	203	102	303	303	303	103	303	404	303	404	103	101	202	404	203	202	204	303	303	102	202	204	404	404	204	103
18LV_6196	*	404	303	202	101	304	202	303	204	101	101	303	204	404	101	202	304	202	202	101	303	303	202	202	102	303	303	303	103	404	404	101	202	303	202	204	404	303	202	204	303	303	102	404	202	404	204	204	103
18LV_6197	*	404	303	202	101	304	204	101	204	101	101	303	404	204	101	202	303	202	202	103	103	303	202	202	101	303	303	303	103	303	404	101	202	303	202	404	404	303	202	204	303	303	102	202	202	404	404	204	103
18LV_6199	*	404	303	202	101	404	202	303	204	101	0	303	204	204	101	202	303	202	202	101	101	303	202	203	202	303	303	303	103	304	404	101	202	101	102	202	404	303	202	404	303	303	102	204	202	404	204	204	103
18LV_6200	*	404	303	203	101	303	202	303	204	101	101	303	404	404	101	202	303	202	202	101	303	303	202	203	102	303	303	303	303	303	404	103	204	103	202	404	404	303	202	204	303	103	102	202	202	404	204	204	103
18LV_6201	*	404	303	203	101	404	202	303	404	101	101	303	404	202	101	202	303	202	202	103	103	303	202	303	101	303	303	303	103	303	404	101	404	103	102	404	404	203	202	204	303	303	102	202	202	204	204	204	103
18LV_6202	*	404	303	202	101	303	202	103	204	101	101	303	404	204	103	202	303	202	202	101	103	303	202	202	101	103	303	303	101	303	404	101	204	303	101	204	404	303	202	404	303	303	102	204	202	404	204	204	103
18LV_6203	*	404	303	203	101	404	202	303	204	101	101	303	204	204	101	202	303	202	204	101	303	303	202	202	101	303	303	303	103	304	404	103	202	303	202	404	404	203	202	404	303	303	0	202	202	404	404	0	0
18LV_6204	*	404	303	202	101	404	202	303	204	101	102	303	204	202	101	202	303	102	204	103	303	303	202	202	101	103	303	103	103	303	404	101	404	303	102	404	404	303	202	404	303	101	0	202	202	404	404	204	101
18LV_6205	*	404	303	202	101	404	202	303	204	101	101	303	204	204	103	204	303	202	404	101	103	303	202	202	102	303	303	303	101	303	404	103	202	303	202	404	404	303	202	204	303	303	102	204	202	204	404	204	103
18LV_6207	*	404	303	202	101	404	202	103	204	101	102	303	404	202	101	202	303	202	202	101	101	303	202	203	102	103	303	303	103	303	404	103	202	303	202	202	404	303	202	204	303	303	202	204	202	404	404	204	103
18LV_6208	*	404	303	203	101	404	204	303	204	101	101	303	404	204	303	202	303	202	202	101	101	303	202	203	102	101	303	303	101	303	404	103	204	303	202	404	404	203	202	204	303	303	102	202	202	404	404	204	103
18LV_6209	*	404	303	202	101	404	202	103	204	101	101	303	404	404	101	202	303	202	204	101	103	303	202	203	102	303	303	303	103	303	404	303	404	303	102	404	404	303	202	204	303	303	102	404	202	404	404	204	103
18LV_6210	*	404	303	203	101	304	202	303	204	101	102	303	404	404	103	202	304	202	202	303	101	303	202	202	101	103	303	303	103	303	404	101	202	103	202	204	404	303	202	404	303	303	102	204	202	404	404	204	103
18LV_6211	*	304	303	202	101	304	204	303	204	101	101	303	204	204	101	202	303	202	202	103	103	303	202	203	101	303	303	303	303	303	404	101	204	303	101	204	404	203	202	404	303	303	102	404	202	202	404	204	103
18LV_6212	*	404	303	202	101	404	202	303	204	101	101	303	404	202	303	202	303	102	202	101	101	303	202	203	202	303	303	303	101	303	404	103	202	103	101	404	404	303	202	204	103	303	102	202	202	404	404	204	103
18LV_6213	*	404	303	203	101	404	202	103	204	101	202	303	204	204	101	202	303	202	202	101	101	303	202	203	101	303	303	303	101	303	404	101	202	303	102	204	404	303	202	404	303	303	101	202	202	404	404	204	0
18LV_6214	*	404	303	202	101	304	202	303	204	101	101	303	204	202	103	202	303	202	204	101	101	303	202	202	101	103	303	303	103	303	404	103	202	103	202	202	404	303	202	204	303	103	102	204	202	404	404	204	103
18LV_6215	*	404	303	203	101	404	202	303	204	101	102	303	204	204	101	202	303	202	202	101	303	303	202	203	102	303	303	303	101	304	404	103	204	303	202	404	404	303	202	204	303	303	102	202	404	404	204	204	103
18LV_6216	*	404	303	202	101	404	202	303	204	101	101	303	404	204	101	202	303	202	202	101	101	303	202	202	101	103	303	303	103	303	404	101	202	303	202	204	404	203	202	204	303	303	102	204	202	404	404	204	103
18LV_6217	*	404	303	202	101	404	204	103	204	101	102	303	202	202	103	202	303	202	202	101	101	303	202	202	101	103	303	303	103	303	404	103	202	303	102	404	404	303	202	404	303	303	102	404	202	404	404	204	103
18LV_6218	*	404	303	203	101	304	204	303	204	101	101	303	404	204	103	202	303	202	202	101	303	303	202	203	101	303	303	303	101	303	404	101	202	103	202	204	404	303	202	404	303	303	202	204	202	404	204	204	103
18LV_6219	*	404	303	202	101	404	202	303	204	101	101	303	204	202	101	202	303	202	204	101	101	303	202	203	102	103	303	103	103	303	404	103	204	303	202	204	404	303	202	204	303	303	102	204	202	404	404	204	103
18LV_6220	*	404	303	203	101	303	202	303	204	101	101	303	404	202	303	202	304	202	202	101	303	303	202	202	102	103	303	303	303	303	404	103	202	103	102	204	404	303	202	404	303	103	102	202	202	404	404	204	103
18LV_6221	*	404	303	303	101	404	202	303	404	101	101	303	202	204	103	204	303	202	202	103	101	303	202	202	101	103	303	303	101	303	404	101	204	303	202	404	404	203	202	204	303	103	102	204	202	404	404	204	103
18LV_6222	*	404	303	202	101	304	202	303	204	101	101	303	404	202	303	204	303	202	202	101	103	303	202	202	202	103	303	303	101	303	404	103	202	103	102	204	404	203	202	404	303	303	102	202	202	404	404	204	103
18LV_6223	*	404	303	202	101	304	202	303	404	101	101	303	404	404	103	202	304	202	202	101	101	303	202	202	101	103	303	303	103	303	404	103	202	103	202	202	404	303	202	204	303	303	102	404	202	204	404	404	103
18LV_6224	*	404	303	202	101	304	202	303	204	101	101	303	204	202	103	202	303	202	202	101	101	303	202	203	101	303	303	303	103	303	404	101	202	303	202	204	404	303	202	404	303	303	102	202	202	404	204	204	103
18LV_6225	*	404	103	202	101	404	202	303	204	101	101	303	404	204	103	202	303	202	204	101	103	303	202	202	101	303	303	303	101	404	404	103	202	303	202	204	404	203	202	204	303	303	102	404	202	404	204	204	103
18LV_6226	*	404	303	202	101	404	202	303	204	101	202	303	202	202	101	202	303	202	202	101	303	303	202	202	202	303	303	103	103	303	404	101	202	103	202	404	404	303	202	204	303	101	102	204	202	404	404	404	103
18LV_6227	*	404	103	202	101	404	202	303	204	101	102	303	404	202	103	202	303	202	204	101	103	303	202	202	101	303	303	303	101	304	404	103	202	103	102	204	404	303	202	204	303	303	102	202	202	404	404	204	103
18LV_6228	*	404	303	203	101	404	202	303	204	101	102	303	204	404	103	202	303	202	202	101	103	303	202	202	101	103	303	303	101	303	404	103	202	103	202	204	404	303	202	404	303	303	102	202	202	204	404	204	103
18LV_6229	*	404	303	203	101	404	202	303	204	101	0	303	404	204	103	202	303	202	202	103	0	303	202	203	101	303	303	303	103	303	404	101	202	303	102	204	404	303	202	202	103	303	102	404	202	404	204	204	103
18LV_6230	*	404	303	203	101	404	202	303	204	101	101	303	204	204	101	202	303	202	202	103	303	303	202	202	202	303	303	303	101	304	404	103	204	303	202	202	404	303	202	204	303	103	102	202	202	404	404	404	0
18RS_6231	*	404	303	203	101	404	202	303	404	101	101	303	202	204	101	204	303	202	202	101	101	303	202	203	102	103	303	303	101	303	404	101	202	303	202	204	404	303	202	202	303	303	102	204	204	404	404	202	103
18RS_6232	*	404	101	203	101	404	202	303	404	101	101	303	404	204	101	204	303	202	202	101	103	303	202	203	102	103	303	303	303	303	404	103	202	303	202	204	404	203	202	202	303	303	102	202	204	404	204	202	103
18RS_6233	*	404	303	202	101	304	202	303	204	101	101	303	404	202	103	404	303	202	202	101	101	303	202	202	102	303	303	303	101	303	404	101	202	103	102	404	404	303	102	404	303	103	101	0	202	0	204	202	101
18RS_6235	*	404	103	202	101	404	204	303	404	101	101	303	404	204	101	204	303	102	202	101	103	303	202	203	101	101	303	303	101	303	404	101	204	103	202	204	404	303	202	204	303	303	102	404	204	404	204	202	103
18RS_6236	*	404	303	303	101	404	202	303	204	101	101	303	404	204	101	0	303	102	202	0	101	303	202	203	102	303	303	303	101	303	404	103	202	103	202	404	404	203	202	204	303	303	101	202	202	0	204	202	101
18RS_6237	*	404	103	202	101	304	204	303	404	101	102	303	404	202	101	204	303	102	202	103	103	303	202	202	101	303	303	303	103	304	404	103	202	303	202	404	404	303	102	204	303	103	102	202	204	404	404	202	103
18RS_6239	*	404	303	203	101	304	202	303	404	101	102	303	404	204	103	204	303	202	202	101	101	303	202	203	101	103	303	303	103	303	404	103	202	103	202	404	404	203	202	404	303	303	102	204	204	404	404	202	103
18RS_6240	*	404	303	202	101	304	202	303	404	101	101	303	202	202	303	204	304	102	204	101	103	303	202	203	102	303	303	303	103	303	404	101	202	103	102	204	404	203	202	202	303	303	102	202	204	404	204	202	103
18RS_6242	*	404	303	203	101	404	202	303	404	101	102	303	202	202	103	204	303	202	202	101	101	303	202	303	101	101	303	303	101	303	404	103	202	303	202	404	404	303	202	204	303	303	102	202	204	404	404	202	103
18RS_6243	*	404	101	203	101	404	204	303	204	101	101	303	404	202	103	204	303	102	404	103	303	303	202	202	101	303	303	303	103	303	404	101	204	303	202	204	404	303	202	202	303	303	102	204	204	404	404	202	103
18RS_6244	*	404	103	202	101	404	202	303	204	101	0	303	202	204	103	204	303	202	202	101	101	303	202	202	101	303	303	303	101	303	404	103	202	103	202	404	404	303	202	204	303	303	202	202	204	404	204	202	0
18RS_6247	*	404	103	202	101	404	202	303	404	101	101	303	404	202	101	204	303	202	204	101	101	303	202	203	101	101	303	303	103	303	404	101	202	101	102	404	404	203	202	204	303	303	102	404	204	404	404	202	103
18RS_6248	*	404	103	202	101	304	202	303	204	101	101	303	404	204	101	204	303	202	202	101	101	303	202	202	102	303	303	303	103	303	404	103	202	103	202	204	404	303	202	202	303	303	0	202	204	404	204	202	103
18RS_6249	*	404	103	203	101	404	202	303	204	101	101	303	202	204	103	204	303	102	204	101	101	303	202	203	202	303	303	303	101	304	404	303	202	303	202	404	404	303	202	404	303	303	101	202	204	404	404	202	103
18RS_6250	*	304	103	203	101	304	202	303	404	101	101	303	404	202	101	204	303	202	202	101	101	303	202	203	202	303	303	303	303	303	404	101	202	303	102	404	404	303	202	204	303	303	102	404	204	404	204	202	103
18RS_6251	*	0	103	203	101	404	202	303	404	101	102	303	202	204	101	204	304	202	202	101	101	303	202	202	102	303	303	303	103	303	404	101	202	103	202	404	404	203	202	204	303	303	102	202	204	0	404	202	103
18RS_6252	*	404	303	203	101	304	202	303	404	101	102	303	404	404	101	204	304	202	202	103	101	303	202	203	202	303	303	303	103	303	404	103	404	303	202	404	404	303	202	404	303	303	102	202	204	404	204	202	103
18RS_6253	*	404	101	202	101	404	202	303	404	101	101	303	202	204	103	204	303	102	202	101	103	303	202	203	101	303	303	303	303	303	404	103	202	303	202	404	404	303	202	204	303	303	102	404	204	404	404	202	103
18RS_6254	*	404	103	203	101	404	202	303	204	101	102	303	404	404	103	204	303	202	202	103	101	303	202	202	101	303	303	303	101	303	404	101	202	303	202	204	404	203	202	202	303	303	101	204	202	202	204	202	101
18RS_6255	*	404	103	203	101	304	202	303	404	101	101	303	202	204	101	204	303	202	204	103	103	303	202	203	102	103	303	303	103	304	404	103	204	103	202	404	404	303	202	204	303	303	102	202	204	204	204	202	103
18RS_6256	*	0	103	202	101	404	204	303	404	101	101	303	202	404	103	404	303	202	202	101	101	303	202	202	101	303	303	103	101	303	404	101	204	303	202	404	404	203	202	204	303	303	102	202	204	404	404	202	103
18RS_6257	*	404	303	203	101	304	204	303	404	101	101	303	202	204	101	204	304	202	202	103	0	303	202	202	102	103	303	303	103	303	404	101	202	103	202	204	404	303	202	204	303	103	102	202	204	404	404	202	103
18RS_6259	*	404	103	202	101	303	202	103	404	101	101	303	404	204	101	204	303	202	202	103	0	303	202	203	102	303	303	303	103	303	404	101	202	303	202	204	404	303	202	202	303	103	102	202	204	404	404	202	103
18RS_6260	*	404	303	202	101	304	202	303	404	101	0	303	202	404	103	204	303	202	202	101	101	303	202	203	101	303	303	303	101	303	404	103	202	103	202	204	404	203	202	202	303	103	102	202	204	404	404	202	103
18RS_6261	*	404	101	202	101	404	204	103	404	101	101	303	202	204	103	204	304	102	202	101	101	303	202	303	202	303	303	103	103	303	404	103	202	103	0	404	404	303	202	404	303	303	102	204	204	404	404	202	103
18RS_6262	*	404	103	303	101	404	202	303	404	101	202	303	202	202	103	204	303	202	204	101	303	303	202	203	102	103	303	303	101	303	204	101	204	303	202	204	404	203	202	204	303	303	102	204	204	404	404	202	103
18RS_6263	*	304	303	203	101	404	202	103	204	101	101	0	202	204	103	0	303	202	202	0	101	303	202	203	101	303	303	303	103	303	404	101	0	103	202	202	404	203	202	404	303	303	101	202	202	404	404	202	101
18RS_6264	*	404	303	203	101	404	202	303	204	101	101	303	202	404	101	204	303	202	202	0	0	303	202	203	101	303	303	303	103	303	404	101	204	303	202	404	404	303	202	404	303	103	101	202	202	0	204	202	101
18RS_6265	*	404	101	202	101	404	404	303	404	101	202	303	202	204	103	204	304	202	202	101	101	303	202	203	101	303	303	303	303	303	404	103	202	101	202	202	404	303	202	404	303	103	102	404	204	404	404	202	103
18RS_6266	*	404	303	202	101	404	202	303	204	101	101	303	202	204	101	404	303	202	202	101	103	303	202	303	101	303	303	303	103	303	404	103	202	303	202	204	404	303	202	204	303	303	0	202	0	404	404	202	103
18RS_6267	*	404	103	203	101	404	202	303	204	101	101	303	404	202	103	204	303	202	204	101	103	303	202	202	101	103	303	303	101	303	404	103	202	303	202	204	404	203	202	204	303	303	102	202	0	404	204	202	103
18RS_6269	*	404	103	303	101	304	204	303	404	101	102	303	404	202	103	204	303	202	204	103	101	303	202	203	101	303	303	303	103	303	404	101	202	303	202	404	404	203	202	204	303	303	102	202	204	404	404	202	103
18RS_6270	*	404	103	202	101	404	202	303	404	101	102	303	404	404	103	204	303	202	204	103	0	303	202	202	101	303	303	303	101	303	404	103	202	303	202	204	404	303	202	204	303	303	102	404	204	404	404	202	103
18RS_6271	*	404	101	203	101	304	202	101	404	101	101	303	202	204	103	204	303	202	204	101	101	303	202	202	202	303	303	303	101	303	404	101	202	103	202	204	404	303	202	404	303	303	102	404	204	404	404	202	103
18RS_6273	*	404	103	303	101	404	204	303	404	101	101	303	404	202	103	204	303	202	202	101	101	303	202	203	102	303	303	103	101	303	404	303	202	303	202	404	404	303	202	204	303	103	102	204	204	204	404	202	103
18RS_6274	*	404	103	203	101	404	202	303	404	101	101	303	202	202	101	204	303	102	202	101	101	303	202	202	102	103	303	303	303	303	204	101	202	103	202	404	404	303	102	404	303	103	102	404	204	404	202	202	103
18RS_6275	*	404	101	203	101	304	202	303	404	101	101	303	404	204	101	204	303	202	204	101	303	303	202	203	101	303	303	303	103	303	404	103	202	303	102	204	404	203	202	202	303	303	102	202	204	404	404	202	103
18RS_6276	*	404	103	203	101	304	202	303	404	101	101	303	202	404	103	204	303	202	202	101	101	303	202	203	101	303	303	303	303	303	404	101	204	103	202	404	0	303	202	204	303	303	102	202	204	204	204	202	103
18RS_6277	*	404	103	203	101	304	202	303	404	101	102	303	404	204	103	204	303	102	202	101	103	303	202	203	102	101	303	103	103	303	404	103	202	303	202	404	404	303	202	404	303	303	102	404	204	404	204	202	103
18RS_6278	*	404	101	202	101	304	202	303	404	101	101	303	404	204	103	204	303	202	202	101	101	303	202	202	101	303	303	303	101	303	404	101	404	303	0	404	404	203	202	204	303	303	102	202	204	404	404	202	103
18RS_6279	*	404	101	202	101	304	202	303	404	101	101	303	202	204	101	204	303	102	202	103	0	303	202	202	101	103	303	303	103	303	404	103	202	303	202	404	404	303	202	204	303	303	102	204	204	202	202	202	103
18RS_6280	*	404	101	203	101	304	202	303	404	101	101	303	404	404	101	204	303	202	204	101	101	303	202	203	102	303	303	303	103	303	404	101	204	303	202	204	404	303	202	204	303	303	102	202	204	404	204	202	103
18RS_6281	*	404	103	202	101	304	202	303	404	101	202	303	202	202	103	204	303	202	202	101	101	303	202	202	101	303	303	303	103	304	404	303	202	303	202	204	404	303	202	204	303	303	102	204	204	404	404	202	103
18RS_6282	*	404	303	202	101	404	202	303	204	101	101	303	404	202	103	204	303	102	404	103	101	303	202	203	202	103	303	303	303	303	404	103	404	303	202	404	404	203	102	204	303	303	102	204	204	404	204	202	103
18RS_6283	*	404	103	203	101	304	202	303	404	101	101	303	404	404	101	204	303	102	204	101	101	303	202	203	101	303	303	303	103	303	404	103	404	303	102	204	404	303	202	404	303	303	102	404	204	404	404	202	103
18RS_6284	*	404	303	202	101	304	204	303	404	101	101	303	404	202	101	204	303	202	202	101	103	303	202	202	101	103	303	303	103	303	404	101	202	101	202	204	404	303	102	404	303	103	102	202	404	404	404	202	103
18RS_6285	*	404	303	202	101	304	204	303	404	101	101	0	404	204	103	204	303	202	202	101	101	303	202	203	102	303	303	303	101	304	404	101	202	303	102	204	404	203	202	202	303	103	102	404	204	404	204	202	103
18RS_6286	*	0	101	202	101	304	202	303	204	101	202	303	202	404	103	204	303	202	202	101	101	303	202	203	102	303	303	303	101	303	404	101	202	103	202	404	404	303	202	204	303	303	101	204	202	404	404	202	0
18RS_6287	*	304	101	203	101	404	202	303	404	101	101	303	404	204	103	204	303	202	202	101	303	303	202	202	101	303	303	303	101	303	404	103	204	103	202	404	404	202	202	202	303	303	102	204	204	404	204	202	103
18RS_6288	*	404	103	202	101	304	202	303	404	101	101	303	404	404	101	204	303	202	202	103	101	303	202	202	102	103	303	303	101	304	404	101	404	303	202	204	404	303	202	404	303	303	102	404	204	404	404	202	103
18RS_6289	*	404	103	203	101	404	202	303	404	101	101	303	404	404	103	204	303	202	202	101	0	303	202	203	101	103	303	303	101	303	404	103	204	103	202	404	404	303	202	202	303	303	102	204	404	404	202	202	103
18RS_6290	*	404	303	303	101	304	204	303	204	101	101	303	202	404	103	204	303	202	202	103	303	303	202	202	101	303	303	303	101	303	404	101	204	303	102	404	404	303	202	204	303	103	102	404	204	404	204	202	103
18RS_6291	*	404	103	303	101	303	202	303	404	101	101	303	404	204	103	204	303	202	202	101	101	303	202	203	101	303	303	303	103	303	404	101	202	103	102	204	404	303	202	202	303	303	102	404	204	204	404	202	103
18RS_6292	*	404	101	202	101	303	202	303	404	101	102	303	204	204	103	204	303	202	202	103	103	303	202	202	101	303	303	303	103	303	404	103	202	103	202	404	404	303	202	404	303	303	102	202	204	404	404	202	103
18RS_6293	*	404	101	202	101	304	202	103	404	101	101	303	202	404	303	204	303	202	202	103	303	303	202	303	102	303	303	303	101	303	404	103	202	103	202	204	404	303	202	404	303	303	0	204	202	404	204	202	0
18RS_6295	*	404	103	202	101	304	202	303	404	101	202	303	202	204	101	204	303	102	202	101	101	303	202	202	101	303	303	303	103	304	404	103	202	101	202	404	404	303	202	404	303	303	102	202	204	404	204	202	103
18RS_6298	*	404	303	202	101	404	202	303	404	101	101	303	202	404	103	204	303	202	204	103	101	303	202	202	101	103	303	303	303	303	404	103	202	303	202	404	404	303	202	404	303	303	102	204	204	404	404	202	103
18RS_6299	*	404	103	203	101	404	204	303	404	101	101	0	404	202	101	204	303	202	202	101	303	303	202	203	102	303	303	303	101	303	404	101	202	303	101	204	404	303	202	0	303	303	102	202	204	404	404	202	103
18RS_6300	*	404	101	303	101	304	202	303	404	101	101	303	202	202	101	204	304	202	202	103	101	303	202	203	101	303	303	303	103	304	404	101	202	103	202	404	404	303	202	202	303	103	102	204	204	404	404	202	103
18RS_6301	*	404	303	202	101	304	202	303	404	101	101	303	404	202	101	204	303	102	202	101	303	303	202	202	101	303	303	303	101	303	404	101	204	103	202	404	404	303	202	404	303	303	102	202	204	404	404	202	103
18RS_6303	*	404	303	202	101	304	202	303	404	101	102	303	202	204	103	204	303	202	204	101	0	303	202	303	101	303	303	303	103	303	404	303	202	103	202	404	404	303	202	202	303	303	102	202	204	404	204	202	103
18RS_6304	*	404	103	203	101	304	202	303	404	101	202	303	202	202	103	204	304	102	202	101	303	303	202	303	101	303	303	303	103	304	404	101	202	303	202	404	404	303	202	404	303	303	102	202	204	404	404	202	103
18RS_6307	*	404	101	203	101	304	202	303	404	101	102	303	202	204	101	204	303	202	202	303	103	303	202	303	101	303	303	103	101	303	404	101	202	103	202	204	404	203	202	404	303	103	102	204	204	404	404	202	103
18RS_6308	*	404	103	203	101	404	202	303	404	101	101	303	204	404	103	204	303	202	202	303	303	303	202	203	102	103	303	303	101	303	404	101	404	103	102	404	404	303	202	404	0	303	202	202	204	404	404	202	103
18RS_6309	*	404	103	202	101	404	202	303	404	101	101	303	404	204	103	204	303	202	204	103	101	303	202	203	101	303	303	303	103	303	404	101	204	103	202	404	404	303	202	404	303	303	102	202	204	404	404	202	103
18RS_6310	*	404	103	202	101	404	202	101	404	101	202	303	202	204	101	204	303	202	202	101	303	303	202	202	101	303	303	303	103	303	404	103	202	303	202	204	404	303	202	204	303	303	102	204	204	404	204	202	103
18RS_6311	*	404	303	203	101	404	204	303	204	101	202	303	202	404	101	204	303	102	202	101	0	303	202	303	102	303	303	303	101	404	404	103	202	101	101	404	404	303	202	404	303	303	101	204	202	404	404	202	101
18RS_6312	*	404	103	202	101	404	202	303	0	101	101	303	404	204	101	204	303	202	202	101	101	303	202	303	102	103	303	303	303	304	404	101	204	303	202	204	404	303	202	204	303	303	102	404	204	404	404	202	103
18RS_6313	*	404	101	202	101	404	204	303	404	101	102	303	404	202	103	204	303	102	202	101	103	303	202	202	102	303	303	303	101	303	404	101	204	103	202	404	404	203	202	204	303	103	102	204	204	404	404	202	103
18RS_6314	*	404	303	203	101	304	204	303	204	101	101	303	404	204	103	204	303	102	202	101	101	303	202	303	101	101	303	303	101	303	404	103	0	103	202	204	404	203	202	204	303	303	101	202	0	404	204	202	103
18RS_6315	*	404	303	202	101	304	202	303	404	101	101	303	202	202	103	204	304	202	202	103	103	303	202	203	102	103	303	303	103	303	404	101	404	101	202	404	404	203	202	204	303	303	102	204	204	404	404	202	103
18RS_6316	*	404	101	303	101	404	202	103	404	101	102	303	202	204	303	204	303	202	202	103	101	303	202	202	101	303	303	303	103	303	404	101	202	103	202	404	404	203	202	404	303	303	102	204	204	404	404	202	103
18RS_6317	*	404	103	202	101	404	202	103	404	101	102	303	404	404	101	204	303	202	204	103	303	303	202	202	101	303	303	303	101	303	404	101	404	103	101	204	404	303	202	404	303	303	102	204	204	204	404	202	103
18RS_6318	*	404	303	202	101	404	202	303	204	101	101	303	404	202	101	204	303	202	202	101	101	303	202	202	101	103	303	303	303	303	404	103	202	103	202	204	404	303	202	202	303	303	102	202	204	404	404	202	103
18RS_6319	*	404	103	202	101	303	204	303	204	101	101	303	202	404	101	204	303	202	202	303	103	303	202	202	101	303	303	303	103	303	404	103	404	303	202	404	404	303	102	204	303	101	0	204	204	404	404	202	103
18RS_6322	*	404	103	203	101	304	202	303	204	101	101	303	202	204	101	204	303	102	202	101	101	303	202	203	101	103	303	303	101	404	404	101	404	303	202	404	404	303	202	204	303	303	0	202	202	404	404	202	0
18RS_6323	*	404	103	202	101	404	202	303	404	101	202	303	202	204	101	204	303	202	202	101	103	303	202	203	101	303	303	303	103	304	404	101	404	103	202	204	404	303	202	204	303	303	102	404	204	404	204	202	103
18RS_6324	*	404	103	202	101	303	202	103	204	101	101	303	404	204	103	204	303	202	202	101	101	303	202	203	101	303	303	103	101	404	404	103	202	103	202	404	404	303	202	404	0	303	101	204	202	202	204	202	101
18RS_6325	*	404	103	203	101	404	204	303	404	101	101	303	202	204	103	204	303	202	202	101	103	303	202	202	101	303	203	103	103	303	404	303	204	101	202	404	404	303	202	202	303	303	102	404	204	404	404	202	103
18RS_6326	*	404	103	202	101	404	202	303	404	101	102	303	404	204	101	204	303	202	204	103	101	303	202	203	102	303	303	303	101	304	404	303	204	101	202	204	404	203	202	404	303	303	102	204	0	404	404	202	103
[truncated: 45 more columns]

## Sheet: Table S4-Polymorphic only
Table S4. Genotype data for 85 loci for 705 insects from putative populations used in this study. Samples were named with two digit year, a letter representing the collection site and a sample serial number. Numerical codes 1, 2, 3, and 4 represent IUPAC codes A, C, G, and T, respectively. LV: Landisville; RS: Rocksprings. LV: Landisville; RS: Rocksprings. Samples 05LV_130, 05LV_131, and 05LV_132…
																				19	20	21	22	23	24	25	26	27	28	29	30	31	32	33	34	35	36	37	38	39	40	41	42	43	44	45	46	47	48
		Hz6_0	Hz6_1	Hz6_2	Hz6_5	Hz6_12	Hz6_17	Hz6_18	Hz6_19	Hz6_38	Hz6_43	Hz6_47	Hz6_50	Hz6_55	Hz6_58	Hz6_65	Hz6_68	Hz6_70	Hz6_73	Hz6_79	Hz6_96	Hz6_103	Hz6_104	Hz6_105	Hz6_113	Hz6_114	Hz6_137	Hz6_148	Hz6_154	Hz6_156	Hz6_163	Hz6_164	Hz6_168	Hz6_190	Hz6_193	Hz6_199	Hz6_200	Hz6_213	Hz6_227	Hz6_241	Hz6_250	Hz6_260	Hz6_261	Hz6_276	Hz6_294	Hz6_299	Hz6_304	Hz6_310	Hz6_327
02RS_5943	*	404	303	202	101	304	204	303	204	202	303	404	404	101	202	304	202	202	101	101	203	102	303	303	303	103	303	404	101	204	103	102	404	303	102	204	303	101	101	202	202	404	404	204	101	404	101	303	202
02RS_5944	*	404	103	202	101	404	204	303	204	101	303	404	204	103	202	303	202	204	101	101	202	202	103	303	303	101	303	404	101	404	103	102	404	203	202	204	303	101	101	404	202	404	404	204	101	404	303	203	202
02RS_5945	*	303	103	303	101	404	204	303	204	101	303	404	204	103	202	303	202	202	101	103	203	102	303	303	303	103	303	404	101	202	103	202	404	303	202	404	303	101	101	202	202	404	404	204	101	404	101	203	202
02RS_5946	*	404	303	303	101	304	404	303	204	101	303	204	204	103	202	303	202	202	103	103	203	102	103	303	103	101	304	404	103	202	303	202	404	303	202	404	303	101	101	404	202	404	204	204	101	404	103	303	204
02RS_5947	*	404	103	202	101	304	204	303	204	101	303	404	204	101	202	303	202	202	101	101	303	101	303	303	303	103	303	404	101	204	303	202	204	303	202	404	303	303	101	202	202	404	404	204	101	404	103	203	204
02RS_5948	*	404	103	303	101	404	204	303	204	101	303	404	0	103	202	303	202	202	101	101	203	101	303	303	303	303	304	404	103	202	303	202	204	303	202	404	303	101	101	204	202	404	404	204	101	404	303	303	204
02RS_5949	*	404	303	303	101	304	404	303	404	101	303	404	404	101	204	303	101	202	103	101	203	101	103	303	303	101	304	404	101	202	103	202	204	303	202	202	303	101	101	204	202	404	204	204	101	404	303	303	202
02RS_5950	*	404	303	303	101	304	204	303	204	101	303	404	204	103	202	303	202	202	103	101	202	102	103	303	303	303	303	404	101	404	101	202	204	203	202	204	303	303	101	204	202	404	204	204	101	404	101	303	202
02RS_5951	*	404	103	202	101	404	204	303	204	101	303	404	204	303	202	303	202	202	103	101	203	101	103	303	303	103	303	404	101	202	303	202	404	203	202	202	303	303	101	204	202	404	404	204	101	204	101	303	204
02RS_5952	*	404	101	303	101	304	204	103	204	101	303	404	204	303	202	303	202	202	101	0	203	102	103	303	303	103	303	404	101	404	303	202	204	203	202	204	303	303	101	204	202	204	404	204	101	404	101	303	202
02RS_5953	*	404	103	303	101	304	204	303	204	101	303	404	404	103	202	303	202	202	101	303	202	102	303	303	303	103	303	404	101	204	103	102	404	303	202	204	303	101	101	404	202	404	404	204	101	404	103	203	202
02RS_5954	*	404	303	303	101	303	204	303	204	101	303	404	204	101	202	303	202	202	103	103	203	102	103	303	303	101	303	404	103	202	103	101	404	203	202	202	303	303	101	202	202	404	204	204	101	204	103	303	202
02RS_5955	*	404	103	202	101	303	204	303	204	101	303	204	204	101	202	303	202	202	103	101	203	101	303	303	303	103	303	404	101	404	303	202	204	303	202	404	303	303	101	204	202	204	204	404	101	404	103	303	204
02RS_5957	*	404	303	202	101	304	204	303	204	101	303	404	204	101	202	303	202	202	101	103	203	101	303	303	303	103	303	404	101	404	103	202	204	303	202	204	303	101	101	202	202	404	404	204	101	204	101	303	202
02RS_5958	*	404	303	202	101	304	204	103	204	101	303	204	404	103	202	303	202	202	101	303	202	102	303	303	303	101	303	404	101	202	103	202	404	303	102	202	303	303	101	202	202	404	204	204	101	204	103	303	202
02RS_5959	*	404	103	202	101	404	404	303	202	102	303	404	204	103	202	303	202	202	101	101	202	101	103	303	303	101	304	404	103	202	103	202	404	203	202	404	303	303	101	202	202	404	404	0	101	204	103	203	202
02RS_5960	*	404	303	202	101	404	204	303	204	202	303	204	204	103	202	303	102	204	103	103	203	101	303	303	303	103	304	404	103	202	303	202	404	303	202	404	303	101	101	204	202	404	404	204	101	204	303	303	204
02RS_5961	*	404	101	303	101	404	204	303	204	101	303	404	204	103	202	303	202	202	101	101	202	202	303	303	303	103	303	404	101	202	103	202	204	203	202	404	303	101	101	404	202	404	204	204	101	404	103	203	204
02RS_5962	*	404	103	202	101	304	204	303	204	101	303	404	404	101	202	303	102	202	103	101	203	101	103	303	103	101	303	404	103	202	303	202	404	203	202	404	303	303	101	204	202	404	404	204	101	404	101	203	204
02RS_5963	*	404	101	202	101	404	204	303	204	101	303	204	204	103	202	303	202	202	101	101	203	101	303	303	303	101	304	404	103	0	303	202	404	202	202	204	303	303	101	202	202	404	404	204	101	404	103	303	202
02RS_5964	*	404	101	303	101	303	404	303	204	101	303	404	204	103	202	303	102	202	101	303	202	202	103	303	303	101	303	404	101	202	303	0	404	203	202	204	303	303	101	202	202	404	202	204	101	404	103	303	202
02RS_5965	*	404	303	202	101	404	204	303	204	101	303	202	204	303	202	303	202	202	101	103	202	101	303	303	303	101	304	404	101	204	303	202	0	303	202	404	303	303	101	202	202	204	404	204	101	404	103	303	202
02RS_5966	*	304	303	303	101	304	204	101	202	0	303	204	404	101	202	304	202	202	103	303	202	101	303	303	103	101	303	404	101	202	303	202	204	303	202	204	303	303	101	202	204	404	204	204	101	404	101	203	204
02RS_5967	*	404	101	303	101	404	204	303	204	0	303	202	204	103	202	303	202	202	103	101	203	102	103	303	303	303	303	404	103	404	103	102	202	303	202	202	303	303	101	202	202	204	404	204	101	404	101	203	202
02RS_5968	*	404	303	203	101	404	204	303	204	101	303	404	404	103	204	303	202	202	101	103	202	101	103	303	303	303	303	404	101	0	303	102	404	303	202	204	303	103	101	202	202	404	404	204	101	404	101	203	202
02RS_5969	*	304	103	303	101	304	204	303	204	202	303	404	204	103	202	303	202	202	101	103	203	101	103	303	303	101	303	404	103	202	103	202	404	303	202	404	303	303	102	202	202	404	204	204	101	404	303	303	202
02RS_5970	*	404	303	303	101	304	404	303	204	101	303	404	204	103	202	303	102	204	101	101	203	102	303	303	303	101	303	404	103	202	103	102	404	303	202	404	303	303	101	204	202	404	404	204	101	404	303	203	404
02RS_5971	*	404	103	202	101	304	204	103	204	101	303	204	204	101	202	303	202	202	101	101	202	202	303	303	103	303	303	404	101	202	103	102	204	203	202	204	303	303	101	202	202	404	404	204	101	404	103	203	204
02RS_5972	*	404	103	202	101	304	204	303	204	102	303	404	204	103	202	303	102	202	101	101	203	102	103	303	303	101	0	404	101	202	303	202	404	303	202	204	303	303	101	0	202	404	404	204	101	202	103	303	202
02RS_5973	*	304	303	202	101	404	204	303	204	202	303	404	404	101	202	303	202	202	101	101	202	102	303	303	303	101	303	404	303	202	303	202	204	303	202	404	303	303	101	204	0	404	404	204	101	404	103	303	204
02RS_5974	*	404	303	202	101	304	204	303	204	202	303	204	204	101	202	303	202	202	101	101	202	102	303	303	303	101	303	404	101	204	103	202	404	303	202	404	303	101	101	204	202	404	204	204	101	404	103	303	204
02RS_5975	*	404	303	202	101	303	204	303	204	101	303	404	204	303	202	303	202	202	103	101	203	202	303	303	303	103	303	404	303	204	101	102	404	303	202	204	303	101	101	204	202	404	404	204	101	404	101	203	202
02RS_5976	*	404	101	303	101	404	204	303	204	102	303	404	204	103	202	303	202	202	101	103	202	202	303	303	303	103	304	404	101	204	303	202	202	203	202	404	303	303	101	204	202	404	404	204	101	404	303	203	202
02RS_5977	*	404	103	202	101	404	404	303	204	101	303	404	204	101	202	303	202	204	101	101	203	102	303	303	303	101	304	404	103	202	303	102	204	203	202	204	303	101	101	204	202	204	404	204	101	404	101	203	202
02RS_5978	*	404	103	202	101	304	204	303	204	101	303	404	204	101	202	303	202	202	103	0	202	101	303	303	303	101	303	404	101	202	303	202	404	202	202	404	303	101	101	404	202	404	204	204	101	404	101	203	204
02RS_5979	*	404	303	303	101	304	404	303	204	101	303	404	204	101	202	303	202	204	101	101	203	102	303	303	303	101	303	404	101	202	303	102	404	303	202	404	303	303	101	202	202	404	404	204	101	404	303	303	204
02RS_5980	*	404	103	202	101	304	204	303	204	101	303	404	0	303	202	303	102	204	103	103	203	202	303	303	103	101	304	404	101	204	303	202	204	303	202	202	0	303	101	204	202	404	404	204	101	404	101	203	404
02RS_5981	*	404	103	202	101	304	204	303	204	101	303	404	204	103	204	303	202	202	103	103	203	101	103	303	303	103	304	404	101	202	303	101	204	203	202	202	303	303	101	204	202	404	202	204	101	404	103	303	202
02RS_5982	*	404	103	202	101	404	204	303	204	101	303	404	204	103	202	303	102	202	101	101	202	101	303	303	303	101	404	404	303	404	303	202	404	202	202	204	303	303	102	204	202	404	204	204	101	204	101	303	404
02RS_5983	*	404	103	303	101	404	204	103	204	101	303	404	204	101	202	303	202	202	101	101	202	202	103	303	103	103	303	404	103	204	303	0	404	303	202	204	303	303	101	202	202	404	404	204	101	404	103	303	204
02RS_5984	*	303	303	303	101	304	204	103	204	101	303	204	204	101	202	303	202	202	101	303	202	202	303	303	303	101	404	404	303	202	101	102	404	303	102	204	303	303	101	404	202	404	404	204	101	404	101	203	204
02RS_5985	*	404	103	202	101	404	204	303	204	101	303	404	204	101	202	303	202	202	101	103	202	102	103	303	303	101	303	404	103	202	101	102	204	202	202	202	303	303	101	404	202	404	404	204	101	404	303	303	204
02RS_5986	*	404	303	303	101	404	0	303	202	101	303	204	202	103	202	303	202	202	101	103	203	202	103	303	303	101	303	404	101	202	103	102	404	203	202	202	303	303	101	404	202	404	404	404	101	404	303	203	202
02RS_5987	*	404	103	303	101	304	204	303	204	101	0	404	202	101	202	304	202	202	103	101	202	102	303	303	103	103	303	404	101	202	103	202	404	202	202	404	303	101	101	202	202	404	404	204	101	404	103	303	202
02RS_5988	*	404	103	202	101	404	202	303	202	0	303	404	202	101	202	303	202	202	101	303	203	101	103	303	303	103	303	404	103	204	303	102	404	202	202	204	303	303	101	0	202	404	204	202	101	404	303	303	202
02RS_5989	*	404	103	202	101	404	204	303	204	101	303	204	204	103	204	303	202	202	101	101	202	102	103	303	303	103	304	404	103	404	303	101	204	303	202	204	303	303	101	404	202	204	404	204	101	404	101	203	202
02RS_5990	*	404	101	303	101	404	204	303	204	101	303	204	204	103	202	303	202	202	103	101	202	101	103	303	303	101	303	404	101	404	101	102	404	203	202	204	303	303	101	202	202	404	204	204	101	404	303	203	404
02RS_5991	*	404	103	202	101	404	204	303	204	101	303	202	204	103	202	303	102	202	101	303	203	101	303	303	303	101	303	404	103	404	303	202	204	303	202	404	303	101	101	204	202	404	404	204	101	404	103	303	204
02RS_5992	*	404	101	303	101	304	204	303	204	101	303	404	404	303	204	304	202	202	101	303	202	101	103	303	303	101	303	404	103	404	101	202	404	303	202	404	303	303	101	404	202	204	404	204	101	404	101	303	204
02RS_5993	*	404	103	303	101	404	204	103	204	101	303	404	204	101	202	303	202	202	101	103	203	202	303	303	303	101	404	404	103	202	303	202	204	303	202	202	303	303	101	202	202	404	204	204	101	404	303	303	204
02RS_5994	*	304	303	303	101	404	404	303	204	101	303	204	202	103	202	303	202	202	101	101	203	101	101	303	303	103	303	404	101	204	303	202	204	303	202	204	303	101	101	204	202	404	204	204	101	404	101	303	202
02RS_5995	*	404	103	303	101	404	204	303	204	102	303	404	202	103	202	303	102	202	101	101	202	102	101	303	303	101	304	404	103	202	303	101	204	203	202	204	303	303	101	204	202	404	404	204	101	404	101	303	202
02RS_5996	*	404	101	202	101	404	204	303	204	101	303	202	0	303	202	303	202	202	103	103	202	102	103	303	303	101	304	404	103	202	103	102	204	203	202	204	303	303	101	204	202	404	404	204	101	404	103	203	202
02RS_5997	*	404	103	202	101	304	204	303	204	202	303	404	204	103	202	303	202	204	103	303	202	101	303	303	303	101	304	404	103	204	303	202	404	203	202	204	303	303	101	202	202	404	404	204	101	404	101	303	202
02RS_5998	*	404	303	202	101	303	0	103	204	101	303	404	204	303	202	303	202	202	103	101	203	102	303	303	0	103	303	404	101	202	103	202	202	203	202	404	303	101	101	404	202	404	204	204	101	404	101	303	202
02RS_5999	*	404	303	303	101	304	204	303	204	101	303	204	204	101	202	303	102	204	101	303	202	101	101	303	303	103	303	404	101	202	103	101	204	303	202	404	303	101	101	204	202	404	404	204	101	404	101	303	204
02RS_6000	*	404	303	303	101	404	204	303	204	101	303	404	204	103	202	303	202	202	101	101	202	101	303	303	303	101	303	404	103	204	303	202	404	303	202	202	303	303	101	202	202	404	404	204	101	404	103	303	202
02RS_6001	*	404	103	303	101	404	204	303	404	101	303	202	204	303	202	303	202	204	101	101	202	102	103	303	303	101	304	404	103	202	303	202	404	303	202	204	303	303	101	202	202	404	404	204	101	404	303	303	202
02RS_6002	*	404	103	303	101	304	204	303	204	102	303	404	202	103	202	303	101	202	101	303	202	102	303	303	303	101	303	404	103	204	101	202	204	303	202	204	303	303	101	204	202	404	404	204	101	404	103	203	202
02RS_6003	*	404	103	202	101	404	204	303	204	202	303	204	404	103	202	304	202	202	103	101	203	101	303	303	303	103	303	404	101	202	103	202	404	303	202	204	303	303	101	202	404	404	404	204	101	404	103	303	202
02RS_6004	*	404	303	202	101	404	204	303	204	101	0	202	204	303	202	303	202	202	101	101	202	102	103	303	303	101	303	404	103	202	303	202	404	203	202	404	303	303	101	204	202	204	404	204	101	404	101	203	202
02RS_6005	*	404	303	303	101	404	204	303	204	101	303	202	204	103	202	303	202	202	103	101	303	102	303	303	303	103	304	404	101	202	101	202	404	303	202	404	303	101	101	202	202	404	404	204	101	404	103	303	202
02RS_6006	*	304	0	303	101	404	204	303	202	102	303	204	204	103	202	303	202	202	101	103	203	102	103	303	303	101	303	404	101	204	303	102	404	203	202	404	303	101	101	204	202	404	204	204	101	204	101	303	202
02RS_6007	*	404	103	202	101	304	404	303	204	101	303	404	204	103	202	303	102	202	101	103	202	102	103	303	303	103	303	404	101	202	303	202	404	303	202	204	303	303	101	404	202	404	404	204	101	404	303	303	204
02RS_6008	*	404	103	202	101	303	204	303	204	102	303	404	404	101	204	304	202	202	101	101	303	101	103	0	303	101	303	404	101	0	303	102	404	203	202	204	303	101	101	404	202	404	202	204	101	404	101	203	202
02RS_6009	*	404	303	202	101	304	204	303	204	101	303	404	204	303	202	303	202	404	101	101	303	102	303	303	303	101	303	404	101	204	103	202	204	203	202	202	303	303	101	204	202	404	404	204	101	404	103	203	204
02RS_6010	*	404	103	202	101	404	204	303	204	101	303	204	204	103	202	303	102	202	103	101	203	202	103	303	303	103	303	404	101	202	303	202	204	303	202	404	303	303	101	404	202	404	404	204	101	404	303	203	202
02RS_6012	*	304	0	303	101	404	204	303	204	101	303	404	204	101	202	303	202	202	101	303	203	102	303	303	303	101	303	404	303	404	103	202	404	203	202	202	303	101	101	204	202	404	0	204	101	404	101	303	204
02RS_6013	*	404	103	303	101	404	404	103	204	101	303	404	204	101	202	303	202	202	101	103	202	102	303	303	303	303	303	404	103	204	103	202	404	303	202	404	303	303	101	204	202	404	404	404	101	404	103	203	202
02RS_6014	*	404	303	303	101	404	404	303	204	102	303	404	204	103	202	303	102	202	103	101	202	102	103	303	303	103	303	404	103	202	103	102	204	203	202	204	303	303	101	202	202	404	404	204	101	404	103	303	204
02RS_6015	*	0	103	303	101	304	404	303	204	202	303	404	204	101	202	303	202	202	101	101	203	101	303	303	303	103	304	404	103	202	103	102	404	303	202	204	303	303	101	202	202	404	404	204	101	404	303	203	204
02RS_6016	*	404	303	303	101	304	204	303	204	101	303	202	204	303	202	303	102	202	101	101	202	102	303	303	303	101	304	404	303	204	303	202	204	303	202	204	303	303	101	204	202	404	204	204	101	404	101	303	204
02RS_6017	*	404	303	202	101	404	204	303	204	101	303	202	404	103	202	304	202	202	103	101	203	102	303	303	303	103	303	404	101	202	103	202	204	303	202	202	303	303	101	204	202	404	204	404	101	404	101	203	204
02RS_6018	*	404	103	202	101	304	204	303	204	102	303	404	404	101	202	304	202	202	101	101	202	102	303	303	303	101	303	404	101	204	303	202	404	303	202	404	303	303	101	202	202	404	404	204	101	404	103	303	202
02RS_6019	*	304	303	202	101	404	204	303	204	101	303	404	404	303	204	303	202	202	101	103	202	202	303	303	303	103	303	404	101	202	103	202	204	203	202	204	303	303	101	202	202	404	404	204	101	404	103	303	202
02RS_6020	*	404	103	202	101	404	204	303	204	101	303	204	404	103	202	303	202	204	101	101	202	102	103	303	303	101	303	404	101	202	103	202	204	303	202	404	303	101	101	202	204	204	404	204	101	404	101	203	204
02RS_6021	*	304	103	0	101	404	404	303	404	202	303	404	204	101	202	303	202	204	103	101	203	102	303	303	303	103	303	404	103	204	303	102	202	303	202	404	303	303	101	204	202	404	204	204	101	404	103	303	202
02RS_6022	*	304	103	303	101	404	204	303	204	102	303	404	204	101	204	304	202	204	103	303	203	102	101	303	303	103	303	404	101	404	303	202	202	303	202	202	303	101	101	204	202	404	404	204	101	404	103	303	202
02RS_6023	*	404	103	303	101	304	404	303	204	101	303	204	404	103	202	303	202	202	101	103	303	101	303	303	303	101	303	404	303	0	303	202	404	303	202	202	303	101	101	202	202	404	204	204	101	404	103	203	202
02RS_6024	*	303	101	202	101	404	204	303	204	101	303	204	204	303	202	404	202	202	101	101	203	102	103	303	303	101	303	404	103	202	103	202	404	203	202	202	303	303	101	404	202	404	204	204	101	404	303	203	202
02RS_6025	*	404	103	303	101	404	204	303	204	101	303	204	204	101	202	303	202	202	101	103	203	101	303	303	303	101	303	404	101	204	103	202	204	303	202	204	303	101	101	202	202	404	204	204	101	404	303	303	204
02RS_6026	*	303	101	202	101	404	404	303	204	101	303	404	204	101	202	303	202	202	101	101	203	101	303	303	103	101	304	404	101	202	103	202	204	303	202	204	303	303	101	202	202	404	204	204	101	404	303	303	204
02RS_6027	*	404	101	202	101	404	204	303	204	101	303	404	204	101	202	303	202	202	103	101	203	202	303	303	303	101	304	404	103	204	103	202	404	303	202	204	303	101	101	204	202	204	404	204	101	404	101	303	202
02RS_6028	*	404	303	303	101	303	204	303	204	102	303	202	404	103	202	303	102	202	101	101	202	202	303	303	303	101	304	404	101	204	103	202	404	303	202	204	303	303	101	204	202	404	404	204	101	404	103	203	204
02RS_6029	*	404	303	202	101	404	204	103	204	101	303	204	404	101	202	303	202	204	101	101	303	102	303	303	303	101	303	404	101	202	303	202	404	303	202	204	303	101	101	202	202	404	404	204	101	404	103	203	202
02RS_6030	*	404	101	202	101	404	404	303	204	102	303	204	204	101	202	303	202	202	103	0	202	102	303	303	103	103	303	404	103	202	303	202	204	203	202	404	303	303	101	202	202	404	404	204	101	404	103	203	0
02RS_6031	*	404	103	202	101	404	404	303	204	102	303	404	204	101	202	304	202	202	101	101	203	102	303	303	303	103	304	404	103	204	101	202	204	203	202	204	303	303	101	204	202	404	204	204	101	404	103	203	202
02RS_6032	*	304	303	303	101	304	204	303	204	202	303	204	0	303	202	303	202	202	101	103	202	101	103	303	303	103	303	404	101	202	103	202	202	303	202	202	303	303	101	202	202	404	204	204	101	404	101	303	202
02RS_6033	*	404	101	202	101	304	204	303	204	102	303	404	204	101	204	303	202	202	103	103	202	202	303	303	303	103	303	404	101	204	303	202	404	303	202	204	303	303	101	204	202	404	204	204	101	404	103	203	202
02RS_6034	*	404	103	303	101	304	204	303	204	102	303	204	204	103	202	303	202	202	103	101	202	202	303	303	303	103	304	404	101	204	303	102	404	203	202	204	303	303	101	202	202	404	404	204	101	404	303	303	202
02RS_6035	*	404	103	202	101	304	204	303	204	101	303	404	204	103	202	303	202	202	101	103	203	101	303	303	103	103	303	404	101	204	103	202	204	303	202	202	303	303	101	202	204	404	404	204	101	404	101	303	202
02RS_6036	*	404	101	202	101	304	204	303	204	101	303	204	204	101	202	303	202	202	101	0	202	101	103	303	303	103	303	404	103	202	103	202	204	203	202	202	303	101	101	204	202	204	404	204	101	404	103	203	204
02RS_6037	*	404	303	303	101	304	204	303	204	101	303	204	404	103	202	303	202	202	101	303	203	102	303	303	303	103	303	404	101	202	303	102	404	203	202	204	303	303	101	204	202	404	404	204	101	404	103	203	202
02RS_6038	*	404	303	303	101	404	204	303	204	101	303	204	204	101	202	303	202	204	103	103	202	102	303	303	303	101	303	404	103	404	303	202	404	303	202	404	303	303	101	204	202	404	404	204	101	404	303	303	202
02RS_6039	*	404	103	202	102	404	404	303	204	202	303	404	204	103	202	303	202	202	103	101	203	102	103	303	103	303	303	404	103	202	303	202	204	203	202	202	303	303	102	202	204	204	202	204	103	404	303	303	202
02RS_6041	*	404	103	202	102	304	404	303	204	102	303	204	202	103	202	303	202	202	101	101	202	102	103	303	103	101	303	404	103	202	303	202	404	303	102	204	303	303	102	404	204	404	404	204	103	404	303	303	202
02RS_6042	*	404	103	202	102	304	204	303	204	101	303	204	204	303	202	303	202	202	101	303	203	102	103	303	103	303	303	404	101	202	103	202	404	303	102	204	303	303	102	204	204	204	404	204	103	404	101	203	204
02RS_6043	*	404	103	203	102	304	204	303	204	0	303	404	204	103	202	303	202	202	101	101	203	102	303	303	103	103	304	404	103	202	303	202	204	203	202	204	303	303	102	202	204	404	204	204	103	404	103	203	202
02RS_6044	*	404	103	203	102	404	404	303	204	0	303	204	204	101	202	303	202	202	103	103	203	101	103	303	103	101	303	404	103	404	103	202	404	203	202	404	303	303	102	202	204	404	404	204	103	404	103	303	204
02RS_6045	*	404	103	202	102	404	204	303	204	101	303	404	204	101	202	303	202	202	101	103	203	102	303	303	103	303	304	404	101	202	303	102	202	303	202	204	303	103	102	404	204	404	204	204	103	404	103	303	204
02RS_6046	*	404	103	303	102	304	404	303	204	101	303	204	202	101	202	303	102	202	101	101	202	101	101	303	103	101	303	404	101	202	103	202	404	203	101	204	303	103	102	204	204	204	204	204	103	204	303	203	202
02RS_6047	*	404	103	202	102	303	204	303	204	101	303	204	404	103	202	303	202	202	101	101	202	102	103	303	103	303	303	404	103	202	103	202	404	202	202	404	303	303	102	202	204	404	204	204	103	204	103	303	202
02RS_6048	*	404	103	203	102	404	204	303	204	101	303	204	204	303	202	303	202	202	103	101	202	101	303	303	103	103	303	404	101	202	303	202	204	303	202	202	303	303	102	404	204	404	404	204	103	404	103	203	202
02RS_6049	*	404	103	202	102	304	404	303	204	101	303	404	204	101	202	303	202	202	101	103	203	102	303	303	101	101	304	404	101	404	103	202	204	303	202	204	303	103	102	202	204	404	404	204	103	404	303	203	202
02RS_6050	*	404	101	202	102	404	404	303	204	101	303	204	404	103	202	303	102	202	101	101	202	102	303	303	103	103	303	404	103	202	103	202	404	203	202	204	303	303	102	202	204	404	404	204	103	204	103	203	202
02RS_6051	*	404	101	203	102	304	204	303	204	101	303	404	404	101	202	303	202	202	101	303	202	202	303	303	103	101	303	404	103	202	303	202	404	303	202	204	303	303	102	202	204	404	204	204	103	404	103	303	202
02RS_6052	*	404	103	202	102	404	204	103	204	101	303	404	204	101	202	304	101	202	101	101	203	101	303	303	103	101	404	404	103	202	303	202	404	303	202	204	303	303	102	204	204	404	404	204	103	404	103	203	204
02RS_6053	*	404	103	202	202	304	404	303	204	101	303	404	404	103	202	303	202	202	101	103	202	102	103	303	103	103	303	404	101	202	303	102	404	203	202	204	303	303	102	204	204	404	204	204	101	404	303	303	404
02RS_6054	*	404	103	202	102	304	204	303	204	101	303	204	404	101	202	303	202	202	101	101	202	101	303	303	103	101	303	404	103	204	103	202	404	303	202	404	303	103	102	404	204	204	404	204	103	404	101	303	202
02RS_6055	*	404	103	203	102	304	204	303	204	101	303	204	404	103	202	303	202	202	103	101	203	101	103	303	103	103	303	404	101	202	103	102	404	203	202	202	303	303	102	202	204	404	202	204	103	404	103	303	204
02RS_6056	*	404	103	202	102	404	204	303	204	101	303	204	202	103	202	303	202	202	101	103	203	102	303	303	103	101	303	404	101	202	303	102	404	303	202	204	303	303	102	202	204	404	204	204	103	404	103	203	204
02RS_6057	*	404	101	202	102	304	404	303	204	202	303	404	202	101	202	303	202	204	101	101	202	101	303	303	103	101	304	404	101	202	103	102	404	303	202	204	303	303	102	404	204	404	404	204	103	404	303	203	202
02RS_6058	*	404	103	202	102	404	204	303	204	0	303	204	204	101	202	303	202	204	103	101	202	102	303	303	103	101	303	404	103	404	101	202	204	303	202	202	303	103	102	404	204	404	404	204	103	404	103	303	202
02RS_6059	*	404	103	202	102	404	204	303	204	101	303	404	204	103	202	304	102	202	101	303	202	101	303	303	103	103	303	404	103	202	303	202	404	303	202	202	303	303	102	202	204	404	404	204	103	204	303	203	204
02RS_6060	*	404	103	303	102	304	204	303	204	101	303	404	204	101	204	303	102	202	101	303	203	101	303	303	103	101	303	404	101	202	103	202	204	303	202	404	303	303	102	404	204	404	204	204	103	404	103	203	202
02RS_6061	*	404	103	202	102	304	204	303	204	101	303	204	204	101	202	303	102	202	101	101	203	101	303	303	103	303	303	404	103	202	303	202	204	303	202	204	303	303	102	204	204	404	204	204	103	204	103	303	404
02RS_6062	*	404	0	202	101	304	204	103	204	101	303	404	204	101	202	303	102	202	103	101	202	101	303	303	303	303	303	404	103	204	303	102	404	203	202	404	303	303	101	202	204	404	404	0	101	404	103	203	204
02RS_6063	*	404	103	202	102	304	204	303	204	202	303	404	204	103	202	303	202	202	101	303	202	202	303	303	103	303	303	404	101	404	303	102	404	203	202	404	303	303	102	204	404	404	404	204	103	204	103	303	204
02RS_6064	*	404	0	202	101	304	202	303	202	202	303	404	404	103	202	303	202	202	101	101	303	202	303	303	303	103	303	404	101	202	103	202	404	303	202	202	303	303	101	202	202	404	404	202	101	204	303	303	202
02RS_6065	*	404	103	202	102	404	404	303	204	102	303	204	204	101	202	303	202	202	101	101	203	101	303	303	103	103	303	404	101	202	103	202	204	303	202	204	303	303	102	202	204	404	204	204	103	404	303	203	202
02RS_6066	*	404	103	202	102	404	404	303	204	102	303	404	204	101	202	303	202	202	303	101	202	202	303	303	103	101	303	404	101	202	103	202	204	303	202	202	303	303	102	204	204	404	404	204	103	404	103	203	204
02RS_6067	*	304	103	202	102	304	204	303	204	101	303	404	404	101	202	303	202	202	101	101	203	101	103	303	103	101	303	404	103	202	103	202	204	303	202	404	303	303	102	204	204	404	204	204	103	202	303	303	202
02RS_6068	*	404	101	203	102	404	204	103	204	101	303	404	204	103	202	303	102	202	103	101	202	102	303	303	103	103	303	404	101	204	303	102	204	203	202	204	303	303	102	202	204	404	204	204	103	404	101	303	204
02RS_6069	*	404	103	202	102	304	204	303	204	102	303	404	204	103	202	303	202	202	101	101	202	101	303	303	101	101	404	404	103	202	303	102	204	303	202	404	303	303	102	202	204	404	404	204	103	404	101	303	202
02RS_6070	*	404	103	202	102	404	404	303	204	202	303	204	202	101	202	303	202	202	101	0	203	102	303	303	103	103	303	404	103	202	103	102	204	303	202	204	303	303	102	202	204	404	404	404	103	404	303	303	404
02RS_6071	*	404	103	202	102	304	204	303	204	101	303	404	204	103	202	303	202	202	101	103	203	102	303	303	103	103	303	404	103	202	303	202	204	303	202	202	303	303	102	204	204	404	404	204	103	404	101	303	204
02RS_6072	*	404	103	202	102	304	404	303	204	102	303	404	204	103	202	304	202	202	101	103	203	101	303	303	103	303	303	404	103	204	303	202	204	303	202	404	303	103	102	202	404	404	404	204	103	404	103	303	202
02RS_6073	*	404	103	202	102	404	404	103	204	101	303	204	204	103	202	303	202	202	101	103	203	102	303	303	103	103	303	404	303	202	103	102	404	303	202	202	303	303	102	204	204	404	204	204	103	404	103	203	202
02RS_6074	*	404	103	203	102	304	204	303	204	101	303	204	404	103	202	303	102	202	103	101	202	102	103	303	103	303	304	404	103	202	303	202	404	303	202	204	303	303	102	204	204	204	204	204	103	204	101	203	202
02RS_6075	*	404	103	202	102	404	0	303	204	101	303	404	404	101	202	303	202	202	103	0	202	101	303	303	103	303	304	404	103	204	103	101	404	202	202	404	303	103	102	204	404	404	404	204	103	404	303	203	202
02RS_6076	*	404	103	203	102	404	204	303	204	101	303	204	404	303	202	303	102	204	101	101	202	102	103	303	103	101	303	404	101	202	303	102	404	303	202	204	303	303	102	0	204	404	404	204	103	404	103	303	204
02RS_6077	*	404	103	203	102	304	204	303	204	101	303	204	404	101	202	303	101	202	101	303	202	102	103	303	103	303	303	404	103	204	303	102	204	203	202	204	303	303	102	202	204	404	404	204	103	404	303	203	202
02RS_6078	*	404	103	203	102	304	204	103	204	202	303	204	204	103	202	304	202	202	103	103	202	102	103	303	103	103	303	404	303	202	103	0	404	303	202	204	303	101	102	202	204	404	404	204	103	404	103	203	202
02RS_6079	*	304	103	203	102	404	204	303	204	102	303	404	202	101	202	303	202	202	103	101	203	102	303	303	103	101	303	404	101	202	303	101	404	203	102	204	303	303	102	202	204	404	404	204	103	404	101	303	202
02RS_6080	*	404	103	303	102	304	204	303	204	101	303	404	202	103	202	303	202	204	101	101	203	102	103	303	103	103	303	404	103	202	103	202	404	303	202	404	303	303	102	204	204	404	404	204	103	404	103	303	202
02RS_6081	*	404	103	202	102	304	404	103	204	0	303	404	202	101	202	304	202	202	103	303	202	101	103	303	103	103	304	404	101	204	103	202	204	303	202	202	303	303	102	404	204	404	204	204	103	404	101	203	404
02RS_6082	*	404	103	303	102	404	204	303	204	101	303	204	204	101	202	303	101	202	103	303	203	101	103	303	103	103	303	404	101	202	101	202	404	303	202	204	303	303	102	204	204	404	404	204	103	404	101	203	204
02RS_6083	*	404	103	202	102	404	204	303	204	102	303	404	204	101	202	303	202	202	101	101	203	101	303	303	103	303	303	404	101	404	303	202	404	303	202	404	303	103	102	202	204	204	204	404	103	404	101	203	202
02RS_6084	*	404	103	203	102	404	204	303	204	101	303	404	204	103	202	303	202	202	103	303	203	101	303	303	103	101	404	404	303	202	303	101	202	202	202	202	303	303	102	202	204	404	404	204	103	404	103	303	202
02RS_6085	*	404	103	202	102	404	204	303	204	202	303	404	202	103	202	303	202	202	101	101	203	101	303	303	103	101	303	404	103	202	103	102	204	202	202	204	303	303	102	404	204	404	404	204	103	404	101	303	202
02RS_6086	*	404	103	202	101	404	204	303	204	101	303	404	202	103	202	303	202	204	101	103	203	101	103	303	103	101	304	404	103	202	303	202	204	303	202	202	303	103	101	202	404	404	404	204	101	404	101	303	204
02RS_6087	*	404	103	303	102	404	204	303	204	101	303	204	202	103	202	303	202	202	101	101	203	102	303	303	103	103	304	404	103	404	303	102	404	303	202	204	303	103	102	202	204	404	404	204	103	404	103	303	202
02RS_6088	*	404	103	202	102	404	204	103	204	102	303	204	202	101	202	304	202	202	101	101	203	202	103	303	103	103	303	404	101	202	303	102	404	303	202	204	303	303	102	404	204	204	404	204	103	404	101	303	202
02RS_6089	*	404	103	202	102	404	204	303	204	101	303	204	204	103	202	304	202	202	101	103	202	202	303	303	103	103	303	404	303	204	103	202	204	203	202	404	303	103	102	202	204	404	204	204	103	404	101	303	404
02RS_6090	*	404	101	203	102	404	204	303	204	101	303	404	404	303	202	303	202	202	101	103	202	202	103	303	103	103	404	404	103	204	103	102	404	303	202	204	303	303	102	204	204	404	404	204	103	404	303	203	202
02RS_6091	*	404	103	203	102	303	204	303	204	101	303	404	204	103	202	304	202	202	103	103	202	102	103	303	103	103	304	404	101	204	103	202	404	303	102	204	303	103	102	202	404	404	404	204	103	404	101	303	202
02RS_6092	*	404	103	203	0	304	204	103	204	102	303	204	404	101	202	303	202	204	101	103	202	102	103	303	103	101	304	404	101	202	103	202	204	203	202	204	303	303	0	204	204	404	204	204	101	404	101	203	202
02RS_6093	*	404	101	202	102	304	204	303	204	0	303	404	202	103	202	303	202	204	103	0	202	101	303	303	103	103	303	404	101	204	101	202	404	303	202	404	303	303	202	204	204	404	404	204	103	202	101	303	204
02RS_6094	*	404	103	303	102	404	204	303	404	101	303	404	202	103	202	303	202	204	101	303	202	202	103	303	103	103	304	404	103	202	303	102	204	303	202	204	303	101	102	404	404	404	404	204	103	404	303	303	202
02RS_6095	*	404	103	303	102	304	404	303	204	101	303	404	204	103	202	303	202	204	101	101	203	102	303	303	103	101	303	404	101	204	103	202	404	303	202	204	303	103	102	202	204	404	202	204	103	204	103	303	204
02RS_6096	*	404	101	202	102	404	204	303	204	101	303	204	404	103	202	303	202	202	101	303	303	101	303	303	103	303	304	404	303	202	103	202	204	303	202	204	303	103	102	204	204	404	202	204	103	204	101	203	404
02RS_6098	*	404	103	303	102	404	204	303	204	101	303	204	204	103	202	303	202	202	103	101	203	102	303	303	101	101	303	404	103	202	103	202	404	303	202	204	303	303	102	202	204	404	404	204	103	404	101	303	202
02RS_6099	*	404	103	202	102	404	204	303	204	202	303	404	204	103	202	304	202	202	101	101	202	102	303	303	103	303	303	404	103	202	101	202	204	203	202	204	303	303	102	204	204	404	404	204	103	404	303	203	202
02RS_6101	*	404	103	203	102	304	204	303	204	101	303	404	204	101	202	303	202	202	103	101	203	101	303	303	103	303	303	404	101	204	103	102	202	203	202	404	303	303	102	404	204	404	202	204	103	404	303	203	202
02RS_6102	*	404	103	202	102	304	404	303	204	101	303	404	204	103	202	303	102	202	101	0	202	102	303	303	103	303	304	404	101	202	103	202	404	203	202	0	303	303	102	204	204	404	404	204	103	404	101	203	204
02RS_6103	*	404	101	202	102	304	204	303	204	101	303	404	204	101	202	303	202	204	101	0	202	101	303	303	103	101	304	404	103	202	303	202	404	303	202	404	303	103	102	202	204	404	404	204	103	404	103	303	202
02RS_6104	*	404	101	202	102	404	404	303	204	102	303	404	204	103	204	304	202	404	103	101	203	202	303	303	103	103	404	404	103	202	103	101	404	203	202	202	303	303	202	202	204	404	404	204	103	404	101	203	202
02RS_6105	*	404	101	202	102	304	204	303	204	102	303	404	202	101	202	303	202	202	101	101	203	101	303	303	103	103	303	404	103	202	303	202	404	202	202	204	303	303	102	202	204	404	202	204	103	204	101	303	202
02RS_6106	*	404	103	203	102	304	204	303	204	202	303	404	204	101	202	303	202	202	101	103	203	101	303	303	103	101	303	404	101	202	101	202	404	303	102	404	303	303	102	404	404	404	204	204	103	404	101	303	202
02RS_6107	*	404	103	203	102	404	204	103	204	202	303	404	202	103	202	303	202	204	101	101	303	102	303	303	103	101	303	404	101	0	303	202	404	303	202	404	303	303	102	202	204	404	204	204	103	404	101	303	202
02RS_6108	*	404	103	202	102	304	404	303	404	101	303	204	202	103	202	303	202	202	103	101	203	101	303	303	103	303	304	404	101	404	303	102	404	303	202	404	303	303	102	202	204	404	204	204	103	404	101	303	404
02RS_6109	*	404	103	202	102	404	204	303	204	101	303	404	202	303	202	303	202	202	101	303	202	101	103	303	103	303	303	404	103	202	103	202	404	203	202	204	303	303	102	202	404	204	204	204	103	404	101	203	202
02RS_6110	*	404	103	202	102	404	204	303	204	101	303	204	204	103	202	303	202	202	103	101	303	102	303	303	103	303	303	404	103	202	303	0	404	303	202	204	303	103	102	404	204	404	404	204	103	404	103	303	0
02RS_6111	*	404	103	202	102	404	404	303	204	101	303	204	202	103	202	303	202	202	103	101	203	102	303	303	103	101	303	404	101	204	101	101	404	203	102	404	303	303	102	204	204	404	404	204	103	404	103	203	204
02RS_6113	*	404	103	203	102	304	204	103	204	101	303	404	204	101	202	303	202	202	101	101	202	202	303	303	103	103	303	404	303	404	103	102	404	303	202	404	0	103	102	204	0	404	404	204	103	204	303	203	204
02RS_6114	*	404	103	203	102	404	404	303	204	0	303	404	204	103	202	303	202	204	101	303	203	202	303	303	103	103	303	404	101	202	103	202	404	203	202	204	303	103	102	202	204	404	404	204	103	404	303	303	202
02RS_6115	*	304	103	202	102	304	404	303	204	102	303	404	204	101	202	303	202	202	101	0	202	101	303	303	103	103	303	404	101	202	103	101	404	303	202	204	303	303	102	202	204	404	204	204	103	404	101	303	202
02RS_6117	*	404	103	203	102	304	204	303	204	101	303	404	404	101	202	303	102	202	101	103	203	102	103	303	103	103	303	404	103	0	303	202	404	303	202	404	303	303	102	204	204	404	204	204	103	204	103	303	204
02RS_6118	*	404	103	202	102	304	204	103	204	101	303	404	202	103	202	303	102	202	101	0	202	102	303	303	103	103	303	404	101	404	303	202	404	303	202	204	303	303	102	204	204	404	202	204	103	404	303	303	202
02RS_6119	*	404	103	202	102	304	404	303	204	101	303	204	204	103	202	303	202	204	103	303	202	101	303	303	103	303	304	404	303	204	303	102	404	303	202	404	303	303	102	204	204	404	404	204	103	404	103	303	204
02RS_6120	*	404	103	203	102	304	404	303	204	102	303	204	404	103	202	303	202	202	101	103	202	101	103	303	103	103	303	404	101	202	303	0	204	303	202	404	303	303	102	202	204	404	404	204	103	404	303	303	202
02RS_6121	*	404	103	202	102	404	204	303	204	101	303	204	204	101	202	303	102	202	101	101	202	101	303	303	103	103	303	404	101	202	303	202	404	303	202	404	303	303	102	202	204	404	204	204	103	404	101	203	202
02RS_6122	*	404	103	203	102	304	204	303	204	101	303	404	404	103	202	303	102	202	101	101	202	102	303	303	103	103	304	404	101	202	103	202	404	303	202	202	303	303	102	202	204	404	404	204	103	404	103	303	202
02RS_6123	*	404	103	202	102	404	204	303	204	102	303	204	404	103	202	303	102	202	101	101	202	102	303	303	103	103	304	404	103	204	303	202	404	303	202	204	303	103	102	204	204	404	204	204	103	404	103	203	204
02RS_6124	*	404	103	202	101	304	202	303	202	102	303	204	204	103	202	303	202	202	0	101	202	101	303	303	303	101	303	404	101	202	101	202	404	303	202	204	303	303	101	202	202	404	202	202	101	404	303	303	202
02RS_6125	*	404	101	203	102	404	204	303	204	101	303	204	202	101	202	303	102	204	103	101	202	102	103	303	103	101	303	404	103	202	303	202	404	303	202	202	303	303	102	202	204	404	404	204	103	404	101	303	204
02RS_6126	*	404	103	203	102	304	204	303	204	101	303	204	204	101	202	304	202	202	101	101	202	101	303	303	103	101	303	404	101	204	103	202	404	203	202	202	303	103	102	202	204	404	404	204	0	404	101	203	202
02RS_6127	*	404	103	203	102	303	204	303	204	101	303	404	204	101	202	303	202	202	101	101	202	102	303	303	103	303	304	404	103	202	103	202	404	303	202	204	303	303	102	202	204	404	204	204	103	404	101	203	202
02RS_6128	*	404	103	202	102	404	204	303	204	101	303	404	202	101	202	303	202	204	101	101	303	102	103	303	103	103	304	404	101	202	303	0	204	303	202	204	303	303	102	404	204	404	204	204	103	404	103	203	204
02RS_6129	*	404	103	202	102	404	404	303	204	102	303	204	204	103	202	303	202	202	103	0	203	101	101	303	103	103	303	404	103	404	303	202	404	203	202	404	303	303	102	202	204	404	204	204	103	404	101	303	202
02RS_6130	*	404	103	202	101	304	404	303	204	102	303	404	202	101	202	304	202	202	103	101	202	101	303	303	103	103	303	404	103	202	303	202	204	303	202	204	303	303	101	202	202	404	404	204	101	404	101	203	204
02RS_6132	*	404	103	202	102	404	204	303	204	101	303	404	204	101	204	303	202	202	101	0	202	101	303	303	103	103	303	404	303	404	303	202	204	303	202	204	303	303	102	202	204	404	404	204	103	204	303	303	204
02RS_6133	*	404	103	202	102	404	204	303	204	101	303	404	202	101	202	303	202	202	101	101	202	101	103	303	103	101	303	404	103	204	303	202	204	303	202	204	303	103	101	202	204	404	404	204	103	404	101	303	202
02RS_6134	*	404	103	203	102	404	204	303	404	102	303	404	202	303	202	303	202	202	103	101	203	102	103	303	101	103	304	404	103	204	303	202	204	303	202	404	303	303	102	204	204	404	204	204	103	404	103	203	204
05LV_130	*	404	103	203	101	404	204	303	204	101	303	404	404	101	202	303	102	202	101	0	203	101	303	303	303	101	404	404	101	204	103	202	204	303	202	404	303	303	101	204	204	404	404	204	101	404	303	303	202
05LV_131	*	404	101	203	101	404	204	303	204	102	303	404	202	101	202	303	202	202	101	0	202	101	303	303	303	103	304	404	101	204	303	102	404	303	202	202	303	303	101	202	204	404	204	204	101	404	303	303	202
05LV_132	*	404	103	203	101	404	204	303	204	102	303	204	202	101	202	303	202	0	103	101	202	102	303	303	303	103	304	404	101	404	303	102	404	303	202	404	303	303	202	204	204	0	204	202	101	404	103	303	202
05LV_134	*	404	101	203	101	304	204	303	204	202	303	404	204	303	202	304	202	202	101	101	303	101	303	303	303	103	303	404	103	204	103	202	204	303	202	204	303	303	101	204	204	404	404	204	101	204	101	303	202
05LV_136	*	404	103	202	101	404	204	303	204	101	303	204	204	101	202	304	202	202	103	0	303	202	303	303	303	303	303	404	101	204	303	202	404	203	202	404	303	103	101	202	204	404	404	204	101	404	103	203	404
05LV_137	*	404	103	202	101	404	204	303	204	101	303	404	204	101	202	303	202	404	101	101	202	101	103	303	303	101	303	404	101	202	103	202	204	203	202	204	303	303	101	202	204	404	204	204	101	404	103	203	202
05LV_139	*	404	101	202	101	404	204	103	204	102	303	204	204	101	202	303	102	202	101	303	202	202	303	303	303	101	404	404	103	204	303	202	404	203	202	202	303	303	101	202	204	404	404	204	101	404	103	203	202
05LV_140	*	404	103	203	101	404	204	103	204	101	303	204	204	101	202	303	202	202	101	303	202	101	103	303	303	101	303	404	103	202	103	202	404	303	202	202	303	103	101	202	204	404	404	204	101	404	103	303	202
05LV_143	*	404	303	202	101	304	204	303	404	101	303	204	404	103	202	303	202	202	101	101	203	101	303	303	303	103	303	404	103	404	103	202	404	303	202	404	303	303	101	404	204	404	404	204	101	404	103	303	202
05LV_145	*	404	103	202	101	404	204	303	204	101	303	204	202	101	202	303	202	202	103	0	202	102	103	303	303	103	303	404	103	202	303	202	404	303	202	204	303	103	101	202	204	404	404	204	101	404	101	203	202
05LV_146	*	404	303	203	101	304	404	303	204	101	303	204	202	101	204	303	202	404	103	303	202	101	303	303	303	101	404	404	103	404	101	202	204	303	202	404	303	101	101	0	204	404	404	204	101	404	303	203	202
05LV_147	*	404	103	202	101	404	204	303	204	101	303	404	202	103	202	303	102	202	101	101	203	101	303	303	303	303	303	404	103	204	303	202	204	303	202	404	303	303	101	404	204	404	404	204	101	404	103	303	202
05LV_148	*	404	303	202	101	404	204	303	204	101	303	204	202	103	202	303	202	202	101	103	203	102	303	303	303	103	303	404	103	202	303	202	204	303	202	204	303	303	101	404	204	204	204	204	101	404	101	303	202
05LV_149	*	404	303	202	101	404	404	303	204	101	303	404	202	101	202	303	202	202	101	101	203	101	303	303	303	103	303	404	101	404	303	202	404	303	202	204	303	303	101	202	204	404	404	204	101	404	103	303	202
05LV_150	*	404	103	202	101	404	404	103	204	102	303	404	204	103	202	303	202	404	303	101	303	102	303	303	303	103	303	404	101	202	103	102	204	303	202	204	303	303	102	204	204	404	404	204	101	404	103	203	202
05LV_151	*	404	103	202	101	303	204	303	204	102	303	404	204	103	202	304	202	202	101	303	303	101	103	303	303	101	303	404	303	202	103	202	204	303	202	204	303	303	101	202	204	404	404	204	101	404	303	303	202
05LV_152	*	304	303	203	101	404	204	103	204	102	303	204	404	303	202	303	102	202	103	101	202	101	103	303	303	101	303	404	103	202	103	102	202	203	202	204	303	303	101	0	204	404	404	204	101	204	101	203	202
05LV_153	*	404	103	202	101	404	204	303	204	102	303	204	204	103	202	303	102	202	103	303	203	202	103	303	303	101	303	404	103	202	101	202	204	303	202	202	303	303	101	204	204	404	204	204	101	404	103	203	202
05LV_154	*	404	103	202	101	304	404	303	204	101	303	202	404	101	202	303	102	202	103	101	203	101	303	303	303	303	303	404	101	202	303	102	404	303	202	202	303	103	101	202	204	404	404	204	101	404	101	303	202
05LV_155	*	404	103	202	101	404	204	303	204	101	303	404	202	103	202	303	202	404	103	103	202	102	303	303	103	103	303	404	303	202	303	202	404	303	202	204	303	303	101	202	204	404	404	204	101	404	303	303	204
05LV_156	*	404	303	203	101	304	404	303	204	101	303	204	204	303	202	303	202	404	103	101	202	102	303	303	303	103	303	404	303	204	103	102	204	303	202	202	303	303	101	404	204	404	404	204	101	404	101	303	202
05LV-157	*	404	101	203	101	404	204	103	204	102	303	404	202	103	202	303	101	202	103	101	203	101	303	303	303	303	303	404	103	204	103	202	404	303	202	204	303	303	101	202	204	404	204	204	101	404	103	303	404
05LV_158	*	404	303	202	101	304	204	303	404	101	303	202	404	101	202	303	202	404	103	101	303	202	103	303	303	103	404	404	103	0	101	101	204	203	202	202	303	103	101	404	204	404	204	204	101	404	303	203	204
05LV_159	*	404	303	203	101	0	404	303	204	101	0	404	204	101	202	303	202	202	101	101	203	102	303	303	303	103	303	404	101	404	303	102	204	303	202	202	303	303	101	202	204	404	404	204	101	202	101	303	204
05LV_160	*	404	303	203	101	0	404	303	204	101	0	404	204	101	202	303	202	202	101	101	203	102	303	303	303	103	303	404	101	404	303	102	204	303	202	202	303	303	101	202	204	404	404	204	101	202	101	303	204
05LV_161	*	404	303	203	101	404	404	303	204	202	303	204	204	103	204	303	202	202	101	0	203	101	103	303	303	101	404	404	101	202	103	202	204	303	202	404	303	103	101	204	204	404	404	404	101	404	101	203	404
05LV_162	*	404	101	202	101	404	404	103	204	101	303	404	202	101	202	304	202	202	101	101	202	0	303	303	303	101	303	404	101	202	103	202	404	203	202	404	303	303	101	202	404	404	204	204	101	404	103	303	202
05LV_163	*	404	103	203	101	304	204	103	204	101	303	404	204	101	202	303	202	404	101	101	203	101	103	303	303	303	303	404	103	202	303	102	204	203	202	204	303	303	101	202	204	404	204	204	101	404	103	303	202
05LV_164	*	404	303	202	101	404	204	103	204	101	303	404	202	103	202	303	202	404	101	101	202	102	303	303	101	103	303	404	101	202	303	202	404	202	202	204	303	103	101	204	204	404	404	204	101	404	101	203	202
05LV_167	*	404	103	203	101	404	204	303	204	101	303	204	204	103	204	303	202	202	101	101	203	101	303	303	303	101	304	404	103	204	103	202	404	303	202	404	0	303	101	204	204	404	404	204	101	404	103	303	202
05LV_169	*	404	101	203	101	404	204	303	204	102	303	404	404	101	202	303	202	202	101	303	203	102	303	303	303	101	303	404	101	404	303	202	404	303	202	404	303	303	101	204	204	404	404	204	101	404	101	303	204
05LV_170	*	404	303	202	101	304	0	303	204	102	303	204	204	101	204	303	202	202	101	101	202	102	303	303	303	103	303	404	101	202	103	202	204	303	202	204	303	303	101	204	204	404	204	202	101	404	101	203	204
05LV_172	*	404	103	303	101	404	204	303	204	101	303	202	404	101	202	303	202	202	101	101	202	101	303	303	303	101	303	404	103	0	303	202	404	303	202	202	303	303	101	202	204	404	404	204	101	404	101	203	204
05LV_173	*	404	303	203	101	304	204	303	204	101	303	404	202	103	202	303	202	202	103	101	303	202	103	303	303	101	303	404	101	204	103	202	204	303	202	204	303	303	101	202	204	404	204	204	101	204	101	203	202
05LV_174	*	404	303	203	101	304	204	303	204	101	303	202	204	103	204	304	202	202	103	101	202	102	303	303	303	103	304	404	101	202	303	102	404	203	202	204	303	303	101	202	204	404	404	204	101	404	303	303	202
05LV_175	*	404	103	203	101	304	404	303	204	102	303	404	204	103	202	303	202	0	103	101	203	102	303	303	303	103	303	404	103	204	103	202	204	303	202	204	303	303	101	204	204	404	204	204	101	404	303	203	204
05LV_177	*	404	103	202	101	304	204	303	204	101	303	404	404	103	202	303	202	202	101	101	203	102	303	303	303	101	304	404	101	202	303	0	204	303	202	204	303	303	101	202	404	404	404	204	101	404	103	203	202
05LV_178	*	404	103	202	101	404	404	103	204	202	203	204	204	103	202	304	0	204	101	103	203	102	303	303	303	103	303	404	103	404	103	102	204	203	202	204	303	103	101	204	0	204	204	204	101	204	103	203	204
05LV_182	*	404	303	203	101	304	204	303	204	101	303	404	204	103	202	303	202	202	101	101	203	101	303	303	303	103	303	404	101	404	303	101	404	303	102	202	303	303	101	204	204	404	404	204	101	404	103	303	404
05LV_183	*	404	103	202	101	404	204	303	204	101	303	404	202	101	202	303	202	202	101	303	203	101	103	303	303	103	303	404	101	202	103	202	204	203	202	404	303	103	101	202	204	404	204	204	101	404	103	203	204
05LV_184	*	404	103	202	101	304	204	303	204	102	303	404	204	103	202	304	202	202	103	101	202	101	303	303	303	101	303	404	103	202	103	102	404	203	202	202	303	303	101	404	204	404	404	204	101	404	101	303	204
05LV_186	*	404	103	202	101	304	404	303	204	101	303	204	204	303	202	303	202	202	101	103	203	101	103	303	303	101	303	404	103	204	303	202	204	303	202	204	303	303	101	204	204	404	404	0	101	404	101	203	202
05LV_188	*	404	303	202	101	404	204	303	204	101	303	204	204	101	202	303	102	202	101	303	202	101	303	303	303	103	303	404	103	204	101	102	204	303	202	204	303	303	101	202	204	404	404	204	101	204	103	303	204
05LV_189	*	404	103	203	101	304	204	303	204	202	303	404	202	103	202	303	202	202	101	303	203	101	101	303	303	103	304	404	103	404	303	202	204	303	202	404	303	303	102	404	204	404	204	204	101	404	103	303	202
05LV_190	*	404	103	203	101	304	204	303	204	202	303	404	202	103	202	303	202	202	101	303	203	101	101	303	303	103	304	404	103	404	303	202	204	303	202	404	303	303	102	404	204	404	204	204	101	404	103	303	202
05LV_191	*	404	303	203	101	304	204	303	204	101	303	204	404	103	202	303	202	202	103	101	202	101	303	303	303	101	303	404	101	0	303	101	204	203	202	404	303	303	101	204	204	404	404	204	101	204	103	203	204
05LV_193	*	404	303	202	101	304	204	303	204	101	303	202	202	101	202	303	202	202	101	101	202	102	303	303	303	101	303	404	101	202	303	101	404	203	202	204	303	303	101	202	204	404	204	204	101	404	101	203	202
05LV_194	*	404	303	203	101	404	204	303	204	101	303	404	404	101	202	303	202	202	101	103	203	102	303	303	303	101	304	404	103	202	103	202	404	303	202	404	303	303	101	202	204	404	404	204	101	404	103	203	202
05LV_196	*	404	303	202	101	404	204	303	204	101	303	202	204	103	202	303	202	404	103	303	202	101	103	303	303	303	303	404	103	204	303	202	404	303	202	202	303	303	101	204	204	404	404	204	101	202	101	303	204
05LV_197	*	404	103	203	101	303	204	303	204	102	303	204	202	103	202	303	202	202	101	101	202	102	303	303	303	103	303	404	101	202	303	202	404	203	202	404	303	303	101	404	204	404	404	204	101	404	103	203	202
05LV_198	*	404	103	203	101	304	204	103	204	102	303	404	204	101	202	303	102	202	101	303	202	101	303	303	303	103	303	404	303	404	103	101	404	203	202	404	303	303	101	404	204	404	404	204	101	404	101	303	202
05LV_199	*	404	303	202	101	304	404	303	204	102	303	204	202	103	202	304	202	202	101	101	203	101	103	303	303	101	303	404	101	202	103	0	204	303	202	404	303	103	101	404	204	404	202	204	101	404	103	203	202
05LV_1001	*	404	103	202	101	404	204	303	204	102	0	404	202	103	202	303	202	404	101	101	303	101	103	303	303	103	303	404	101	404	103	202	204	303	202	404	303	303	101	404	204	404	404	204	101	404	101	303	204
05LV_1003	*	404	303	202	101	304	204	303	204	102	303	204	204	303	202	303	102	202	101	101	202	102	303	303	303	101	404	404	101	204	103	202	204	303	202	204	303	303	101	202	404	404	404	204	101	404	101	303	202
05LV_1004	*	404	303	202	101	304	204	303	204	101	303	404	204	103	202	303	102	202	103	103	203	101	303	303	303	101	303	404	103	202	103	102	404	203	102	204	303	303	101	404	204	404	204	204	101	404	101	203	204
05LV_1006	*	404	303	202	101	404	204	303	204	101	303	204	204	103	202	303	202	202	101	103	202	102	303	303	303	101	303	404	103	202	303	202	404	203	202	204	303	303	101	204	204	404	204	204	101	204	303	303	202
05LV_1007	*	404	303	203	101	404	204	303	204	101	303	204	404	103	202	303	102	202	101	101	202	101	303	303	303	101	303	404	103	404	103	101	202	203	202	204	303	103	101	404	204	404	204	204	101	404	101	303	202
05LV_1009	*	404	103	202	101	303	404	303	204	101	303	404	404	101	202	303	202	202	101	303	202	101	103	303	303	103	303	404	101	202	101	202	204	303	202	204	303	303	101	202	204	404	404	204	101	404	101	303	202
05LV_1010	*	404	103	202	101	404	204	103	204	0	303	404	202	101	202	304	202	202	101	303	202	202	303	303	303	103	303	404	303	202	103	102	404	303	202	404	303	0	101	204	204	404	204	204	101	404	303	303	204
05LV_1012	*	404	103	203	101	404	204	303	204	101	303	404	202	101	202	303	102	202	103	101	203	101	103	303	303	101	303	404	103	204	103	202	404	203	202	404	303	303	101	204	204	404	204	204	101	404	103	203	404
05LV_1013	*	404	303	203	101	404	404	303	204	101	303	202	204	103	202	303	202	202	101	103	202	102	303	303	303	103	303	404	103	202	303	102	404	303	202	204	303	103	101	202	204	404	404	204	101	404	101	203	204
05LV_1015	*	404	303	202	101	404	204	303	204	102	303	404	204	101	202	303	202	404	101	101	202	102	303	303	303	103	303	404	101	204	103	202	404	303	202	202	303	303	101	204	204	204	404	204	101	404	103	303	204
05LV_1016	*	404	103	303	101	404	404	103	204	202	303	204	204	103	202	303	202	202	101	101	202	202	303	303	303	103	303	404	103	202	103	101	404	303	202	202	303	303	101	204	204	404	204	204	101	404	101	303	202
05LV_1018	*	404	303	202	101	404	204	303	204	101	303	204	204	103	202	303	202	202	101	101	202	102	101	303	303	103	304	404	101	202	303	102	204	303	202	204	303	303	101	204	204	404	204	204	101	404	103	303	202
05LV_1019	*	404	303	202	101	304	404	303	204	202	303	204	202	103	202	303	202	202	101	101	203	102	303	303	303	103	303	404	103	204	303	202	404	203	202	404	303	303	101	202	204	404	404	204	101	404	303	303	202
05LV_1021	*	404	303	202	101	404	404	303	204	202	0	204	204	101	202	303	202	202	101	101	202	102	303	303	303	101	303	404	101	204	303	202	204	203	102	204	303	303	101	204	204	404	204	204	101	204	303	303	202
05LV_1022	*	404	103	203	101	404	404	303	204	101	303	404	204	103	202	303	202	202	101	101	202	102	103	303	303	303	303	404	103	404	103	202	204	203	202	204	303	303	101	0	204	404	404	204	101	404	101	303	204
05LV_1024	*	404	101	202	101	404	404	303	204	101	303	404	202	101	202	303	202	202	103	101	202	101	101	303	303	103	303	404	101	204	103	102	404	303	202	204	303	103	101	204	204	404	204	204	101	404	101	203	204
05LV_1025	*	404	103	202	101	404	204	303	204	101	303	204	202	101	202	303	202	202	101	0	303	102	103	303	303	103	303	404	103	202	303	102	404	203	202	404	303	303	101	404	204	404	404	204	101	404	103	203	404
05LV_1027	*	0	101	202	101	404	204	303	204	101	303	204	204	103	202	303	202	202	101	101	202	102	103	303	303	103	303	404	101	404	303	202	204	203	202	404	303	303	101	404	204	204	204	204	101	404	101	303	202
05LV_1028	*	404	103	203	101	304	404	303	204	102	303	404	202	101	202	304	202	202	101	101	203	101	303	303	303	103	404	404	103	202	303	0	204	203	202	204	303	103	101	202	204	404	404	204	101	404	103	303	202
05LV_1030	*	404	101	202	101	404	204	303	204	101	303	204	202	101	202	303	202	202	101	101	202	101	303	303	303	303	303	404	101	0	303	202	404	303	202	404	303	303	101	204	204	404	204	204	101	404	303	303	202
05LV_1031	*	404	303	203	101	404	404	303	204	101	303	404	202	101	202	303	101	202	101	101	202	101	303	303	303	101	303	404	101	202	303	202	204	303	202	204	303	103	101	202	204	404	404	204	101	404	101	203	202
05LV_1033	*	404	103	202	101	304	404	303	204	101	303	202	204	101	202	303	202	202	101	101	202	202	303	303	303	101	303	404	103	204	103	202	404	203	202	202	303	103	101	202	204	404	404	204	101	404	103	303	204
05LV_1034	*	404	103	203	101	304	204	303	204	102	303	404	204	103	202	303	202	202	101	103	202	102	303	303	303	303	304	404	101	202	103	102	404	303	202	204	303	303	101	204	204	404	404	204	101	404	303	303	202
05LV_1036	*	404	303	203	101	404	204	303	204	102	303	204	202	303	202	303	102	202	101	103	303	101	303	303	303	101	303	404	103	202	103	202	404	303	202	404	303	303	101	202	204	404	404	204	101	404	103	303	202
05LV_1037	*	404	303	203	101	304	204	303	204	102	303	404	204	103	202	303	202	202	101	103	202	101	303	303	303	101	303	404	303	202	103	202	404	303	202	404	303	103	101	204	204	404	404	204	101	404	303	203	202
05LV_1039	*	404	103	203	101	404	404	303	204	101	303	404	204	103	202	303	202	202	103	101	203	101	103	303	303	103	303	404	101	204	303	202	204	303	202	404	303	303	101	404	204	404	204	204	101	404	303	303	202
05LV_1040	*	404	103	203	101	304	204	303	204	101	303	204	204	103	202	303	202	202	101	101	203	202	303	303	303	101	303	404	101	202	303	202	404	303	202	204	303	303	101	202	204	404	404	204	101	204	103	203	202
05LV_1042	*	404	303	203	101	304	204	103	204	101	303	404	202	101	202	303	202	202	101	303	203	101	303	303	303	101	303	404	103	404	103	202	404	303	202	204	303	103	101	202	204	204	404	204	101	404	103	303	404
05LV_1101	*	404	103	203	101	404	404	303	204	101	303	404	404	101	202	303	202	404	103	101	203	102	103	303	303	303	303	404	101	202	303	202	404	202	202	204	303	303	101	204	204	404	202	204	101	404	103	303	202
05LV_1102	*	404	303	202	101	404	404	303	204	101	303	404	204	101	202	303	202	202	101	101	203	101	303	303	303	303	304	404	101	404	303	202	404	203	202	404	303	303	101	404	204	404	404	204	101	404	103	203	204
05LV_1103	*	404	101	202	101	304	204	303	204	102	303	202	204	101	202	303	202	0	103	101	203	102	103	303	303	303	404	404	103	202	303	202	404	303	202	404	303	303	101	202	204	0	204	204	101	404	103	203	202
05LV_1104	*	404	303	202	101	304	204	303	204	101	202	204	204	103	202	304	202	202	101	101	202	101	103	303	303	103	304	404	101	204	101	102	404	303	202	404	303	103	101	202	204	204	404	204	101	404	101	203	204
05LV_1105	*	404	303	202	101	404	204	303	204	202	303	202	204	101	204	303	202	0	103	303	202	101	303	303	303	103	304	404	303	202	103	102	404	303	202	202	303	303	101	202	0	404	204	204	101	404	103	203	202
05LV_1106	*	404	101	202	101	304	204	303	204	0	303	404	202	103	202	303	202	202	101	101	203	102	103	303	303	303	303	404	101	202	103	202	204	303	202	202	303	303	101	202	204	404	404	404	101	404	101	203	202
05LV_1107	*	404	103	203	101	404	204	303	204	0	303	202	202	103	202	303	102	202	103	101	202	101	103	303	303	101	303	404	103	204	303	202	204	203	202	404	303	303	101	202	204	404	202	204	101	404	103	303	204
05LV_1108	*	404	303	203	101	304	204	303	204	101	303	404	204	303	202	303	202	202	103	101	202	101	103	303	303	103	303	404	101	202	303	102	404	303	202	204	303	303	101	202	204	404	404	204	101	202	101	203	204
05LV_1109	*	404	303	203	101	404	204	303	204	101	303	404	204	103	202	303	202	202	103	101	303	102	303	303	303	103	303	404	103	204	303	101	204	303	102	204	303	303	101	202	204	404	204	204	101	404	303	203	202
05LV_1110	*	404	101	303	101	404	404	103	204	101	303	404	204	101	202	303	202	202	103	303	202	101	303	303	303	101	303	404	101	202	303	102	404	303	202	404	303	303	101	202	204	404	404	204	101	404	103	203	202
05LV_502	*	404	103	203	101	304	202	303	204	202	0	204	204	103	202	303	202	202	101	101	202	101	0	303	0	101	303	404	103	202	101	102	204	303	202	404	303	303	102	204	202	404	204	204	103	404	101	303	202
05LV_503	*	304	103	202	101	404	202	303	204	202	303	404	204	101	202	303	202	202	101	0	203	102	103	303	103	103	303	404	103	202	103	202	204	203	202	204	103	303	102	202	202	404	404	204	103	404	101	303	202
05LV_505	*	404	303	202	101	404	202	303	204	0	303	404	202	101	202	303	202	202	303	103	203	102	303	303	101	103	303	404	101	204	303	202	404	303	202	404	303	303	102	202	202	404	404	204	103	404	103	303	204
05LV_506	*	404	303	203	101	404	204	303	204	101	303	404	202	103	202	303	202	202	101	101	202	102	103	303	103	103	303	404	101	404	303	202	404	303	202	404	303	303	102	202	202	404	404	204	103	404	103	303	404
05LV_508	*	404	103	202	101	404	202	303	204	202	303	202	202	103	202	303	202	404	101	101	203	101	303	303	103	101	303	404	103	202	0	202	404	303	202	404	303	303	102	404	202	404	404	204	0	404	303	203	404
05LV_509	*	404	303	202	101	404	202	303	204	101	303	204	202	103	202	303	202	202	101	101	203	102	103	303	103	101	303	404	101	202	103	202	204	303	202	404	101	103	101	204	202	404	204	204	103	404	303	303	202
05LV_511	*	404	103	202	101	404	202	303	204	101	303	404	202	303	202	303	202	202	101	101	202	102	0	303	103	101	304	404	101	202	303	202	204	303	202	204	303	303	102	204	204	404	204	204	103	404	101	303	202
05LV_512	*	404	103	203	101	304	202	303	204	101	303	404	204	303	202	303	202	202	103	101	203	202	303	303	103	101	303	404	101	202	303	202	404	203	202	202	303	303	102	204	202	404	404	204	103	404	101	203	202
05LV_514	*	404	303	203	101	404	202	103	204	101	303	204	202	103	202	303	202	404	101	103	203	102	303	303	103	303	304	404	101	404	101	202	404	203	202	404	303	303	102	204	202	404	404	204	103	404	0	303	204
05LV_515	*	404	303	303	101	404	202	101	204	101	303	204	204	101	202	303	202	202	101	303	203	102	103	303	101	303	303	404	103	202	303	202	404	303	202	202	103	303	102	202	202	404	202	204	103	404	101	303	202
05LV_517	*	404	101	203	101	404	202	303	204	101	303	204	202	101	202	304	202	202	101	303	202	202	303	303	103	101	304	404	101	404	303	102	404	303	202	404	303	303	102	204	202	204	404	204	103	202	101	303	204
05LV_518	*	404	303	203	101	303	202	303	204	202	303	202	202	103	202	303	202	202	103	101	203	101	303	303	103	103	304	404	103	202	303	202	404	303	202	202	303	103	102	202	202	404	404	204	101	404	303	203	202
05LV_520	*	404	103	203	101	404	204	103	204	202	303	404	202	101	202	304	102	202	101	101	203	101	303	303	101	103	303	404	103	202	303	202	404	203	101	404	303	303	102	204	202	404	404	204	103	404	103	203	202
05LV_521	*	404	103	203	101	304	204	303	0	101	303	204	202	103	202	303	202	202	101	101	203	102	103	303	103	101	303	404	101	404	101	202	204	303	202	204	303	303	102	404	202	404	404	204	101	404	103	303	202
05LV_523	*	404	101	203	101	304	202	303	204	0	303	204	202	103	202	303	202	202	103	101	303	101	303	303	103	101	303	404	103	404	303	202	404	203	202	404	303	303	102	204	202	404	202	204	103	404	303	203	202
05LV_526	*	404	103	202	101	404	202	303	204	101	303	204	202	103	202	303	202	202	101	303	303	202	0	303	101	303	304	404	101	202	303	202	204	203	102	204	303	303	102	202	202	404	404	204	103	404	103	303	202
05LV_527	*	404	103	202	101	404	204	303	204	101	303	204	202	103	202	303	202	202	101	101	203	202	103	303	103	101	303	404	103	204	303	202	404	203	202	404	303	303	102	202	202	404	204	204	103	404	303	203	404
05LV_530	*	404	103	203	101	304	202	103	204	202	303	404	202	101	202	304	202	404	101	103	203	202	303	303	103	103	303	404	101	404	303	202	204	303	202	404	303	303	202	202	202	404	404	0	103	404	103	303	202
05LV_532	*	404	303	202	101	404	202	303	204	101	303	404	204	103	202	304	202	202	103	303	202	101	103	303	103	103	303	404	103	202	103	202	404	303	202	204	303	103	102	202	202	404	404	204	103	404	101	203	202
05LV_533	*	404	303	203	101	404	202	303	204	101	303	204	202	103	202	304	202	202	101	103	202	102	303	303	103	103	303	404	101	202	303	202	404	203	202	404	303	303	102	202	204	404	204	204	103	404	103	303	204
05LV_535	*	404	303	203	101	404	204	303	204	202	303	204	202	103	204	303	202	202	101	101	202	101	101	303	103	101	303	404	101	202	103	101	404	303	202	404	303	303	202	202	202	204	404	204	103	404	103	203	202
05LV_536	*	404	101	202	101	304	202	103	204	101	303	404	202	101	202	303	202	404	101	103	203	101	303	303	103	103	304	404	103	202	103	202	404	303	202	404	303	303	102	204	202	404	404	204	103	404	303	203	202
05LV_538	*	404	303	202	101	304	202	303	202	0	303	404	202	101	202	303	202	404	103	303	202	101	303	303	0	101	303	404	101	404	303	202	202	303	202	404	303	0	101	404	202	404	404	204	101	404	103	203	204
05LV_539	*	404	303	202	101	404	202	101	204	101	303	204	202	101	202	303	102	202	101	101	203	102	103	303	103	101	304	404	103	204	103	202	404	303	202	404	303	303	102	202	202	404	404	204	103	404	103	203	202
05LV_541	*	404	103	303	101	404	202	303	404	202	303	404	204	303	202	303	202	202	101	303	202	101	303	303	103	103	303	404	303	204	101	202	204	303	202	404	303	303	102	202	202	404	404	204	103	404	103	203	202
05LV_542	*	404	103	203	101	304	202	303	204	101	303	204	202	101	204	304	202	202	103	103	203	102	303	303	103	101	304	404	101	202	303	202	404	303	202	204	303	103	202	202	202	404	204	204	103	404	303	203	202
05LV_544	*	404	103	203	101	404	204	103	404	101	303	204	202	303	202	303	202	202	101	101	202	102	303	303	103	103	303	404	101	202	303	102	404	303	202	202	303	303	102	202	202	204	404	204	103	204	101	303	202
05LV_545	*	404	103	202	101	404	204	303	204	101	0	404	202	103	202	303	202	202	101	101	203	101	303	303	103	103	303	404	101	202	103	202	204	303	202	404	303	303	102	204	202	404	404	404	103	404	101	303	204
05LV_547	*	404	101	202	101	404	202	303	404	101	303	404	202	101	202	303	202	202	101	101	202	101	101	303	101	103	303	404	303	204	303	202	404	303	202	202	303	103	102	202	202	404	204	204	103	404	103	303	202
05LV_548	*	404	303	202	101	304	204	303	204	202	303	404	202	103	202	303	102	202	101	101	202	101	103	303	103	101	303	404	101	204	103	202	204	203	202	204	303	103	102	404	202	404	204	204	0	404	101	203	204
05LV_550	*	404	103	203	101	304	204	303	204	101	303	204	202	101	202	303	202	202	101	101	203	101	303	303	103	101	303	404	103	202	303	202	204	203	202	404	303	103	102	202	202	404	204	204	0	404	103	203	202
05LV_551	*	404	103	202	101	404	204	303	204	202	303	404	202	303	202	303	102	202	103	101	203	101	303	303	103	101	304	404	101	202	103	102	404	303	202	404	303	303	102	202	202	404	204	204	103	404	103	203	202
05LV_553	*	404	101	203	101	404	202	303	404	202	303	404	202	103	204	303	202	404	101	101	303	102	303	303	103	103	303	404	103	202	103	101	404	203	202	404	303	303	102	202	204	404	404	204	103	404	103	203	202
05LV_554	*	404	101	303	101	304	202	303	204	101	303	204	204	101	202	303	202	202	101	101	203	102	303	303	103	103	303	404	103	0	303	202	204	303	202	204	303	103	102	204	202	404	204	204	103	404	101	203	202
05LV_556	*	404	103	202	101	404	202	303	204	101	303	202	202	101	204	303	202	202	101	303	202	102	303	303	103	101	303	404	101	202	103	0	204	303	202	404	303	303	102	204	202	404	404	204	101	204	103	203	202
05LV_557	*	404	103	303	101	303	202	303	204	202	303	204	202	103	202	303	202	202	101	303	203	102	303	303	103	303	303	404	103	202	101	102	404	203	202	404	303	303	102	202	204	404	404	204	103	404	303	203	204
05LV_559	*	404	103	202	101	404	204	303	204	0	303	404	202	101	202	303	202	202	101	101	203	102	303	303	103	101	304	404	303	202	103	102	404	303	202	204	303	303	102	202	202	404	404	204	103	204	103	203	204
05LV_560	*	304	303	203	101	304	202	303	204	202	303	204	202	103	202	303	102	404	101	101	203	202	103	303	103	103	303	404	103	202	303	102	404	303	102	202	303	303	102	202	202	404	204	204	103	404	103	203	202
05LV_562	*	404	103	203	101	304	204	303	204	101	303	204	204	303	202	303	202	202	101	101	202	101	101	303	103	103	303	404	103	202	303	102	404	303	202	202	303	303	102	202	204	404	404	204	0	204	0	303	202
05LV_565	*	404	103	203	101	304	202	303	204	202	303	204	204	101	202	303	202	404	103	303	202	101	101	303	103	101	303	404	103	202	103	202	404	303	202	202	303	303	102	204	202	404	204	204	103	404	101	303	204
05LV_566	*	404	103	303	101	404	204	103	204	101	303	204	204	103	202	303	202	202	103	303	203	101	103	303	103	101	303	404	103	202	303	202	404	303	202	204	303	103	102	204	202	404	404	204	103	404	103	203	202
05LV_568	*	404	103	203	101	304	202	103	204	101	303	204	202	303	202	303	202	202	103	103	202	101	303	303	103	303	303	404	103	202	101	202	204	303	202	202	303	303	102	204	202	404	404	204	103	204	101	303	202
05LV_571	*	404	103	202	101	304	404	303	204	101	303	404	202	103	202	303	202	404	101	101	203	102	303	303	103	101	303	404	101	202	103	202	404	303	202	202	303	303	202	204	202	404	404	204	103	404	303	203	202
05LV_572	*	404	103	202	101	404	202	303	204	202	303	204	202	103	202	303	202	202	101	101	203	101	103	303	103	101	303	404	303	404	103	202	404	203	202	404	303	303	102	202	202	404	204	204	103	204	303	303	202
05LV_574	*	404	103	202	101	404	204	303	204	101	303	204	202	101	202	303	202	202	101	303	303	102	303	303	103	103	303	404	103	404	103	202	404	303	202	204	303	103	102	204	204	404	404	204	103	404	101	203	202
05LV_575	*	404	103	202	101	304	202	303	204	101	303	204	202	101	202	303	202	404	101	101	303	102	303	303	103	101	303	404	103	204	101	202	404	303	202	202	303	303	102	204	202	404	404	204	103	404	101	303	204
05LV_577	*	404	303	303	101	404	404	303	204	101	303	404	202	101	202	303	202	202	101	103	202	102	103	303	103	103	303	404	101	202	303	202	404	303	202	404	303	103	102	202	202	404	404	204	103	404	103	303	202
05LV_578	*	404	303	202	101	404	202	303	204	101	303	202	204	101	202	303	202	404	101	103	202	101	103	303	103	101	303	404	101	202	303	101	404	203	202	202	303	103	102	202	202	404	202	204	103	404	103	203	202
05LV_580	*	404	101	203	101	404	202	303	204	101	303	204	202	103	202	303	102	202	101	303	202	102	103	303	103	101	303	404	101	202	303	202	404	303	202	204	303	303	102	204	202	404	204	204	103	404	303	303	202
05LV_581	*	404	101	203	101	304	202	303	404	101	303	404	202	101	202	303	202	202	103	101	203	102	103	303	103	101	303	404	101	204	303	202	404	303	202	404	303	103	102	204	202	404	204	204	103	204	101	203	202
05LV_583	*	404	303	202	101	304	204	103	204	202	303	404	202	101	202	303	202	202	101	101	203	102	103	303	103	101	303	404	103	204	303	202	404	203	202	202	303	303	102	202	202	404	404	204	103	404	101	203	202
05LV_584	*	404	303	203	101	304	204	303	202	101	303	0	202	103	202	303	102	404	101	303	202	101	0	303	103	103	304	404	303	0	101	101	404	303	102	404	303	303	102	202	202	404	404	404	101	404	101	203	202
05LV_586	*	404	103	202	101	404	202	303	204	202	303	404	202	303	204	303	202	202	101	103	202	101	101	303	101	101	303	404	101	202	303	102	404	303	202	404	303	303	102	404	202	404	404	204	0	404	101	303	204
05LV_587	*	404	101	202	101	404	204	303	204	101	303	202	202	101	202	303	202	202	101	101	203	202	103	303	103	303	304	404	103	202	303	202	204	203	202	404	303	303	102	202	202	404	404	204	103	404	103	203	202
05LV_590	*	404	303	203	101	404	204	303	204	101	303	202	202	103	202	303	202	202	101	101	202	101	303	303	103	101	303	404	101	204	303	101	404	203	202	202	303	303	102	204	202	404	204	204	103	404	101	203	202
05LV_592	*	404	103	203	101	404	202	303	204	101	303	204	202	103	202	303	102	202	101	101	202	102	103	303	103	103	303	404	103	204	101	202	404	303	202	404	303	103	102	202	202	404	204	204	103	404	101	203	202
05LV_593	*	404	101	202	101	404	202	103	204	101	303	404	204	101	202	303	202	202	101	101	203	101	303	303	0	101	303	404	303	204	303	202	202	303	202	404	303	303	102	204	202	404	404	204	103	404	103	203	202
05LV_595	*	404	303	202	101	404	204	303	204	101	303	404	202	103	202	303	202	202	101	101	203	202	303	303	103	101	304	404	103	202	303	101	204	303	202	204	303	303	102	204	202	404	204	204	103	404	103	203	202
05LV_596	*	404	103	202	101	404	202	103	204	202	303	404	202	103	202	303	202	202	101	101	202	102	303	303	103	103	303	404	103	202	103	202	204	303	202	404	303	303	102	202	202	404	404	204	103	404	101	203	202
05LV_598	*	404	103	202	101	404	202	103	204	101	303	204	202	103	202	303	202	202	101	101	202	101	103	303	103	103	303	404	101	404	303	202	404	303	202	404	303	101	102	202	202	404	404	204	103	404	103	203	202
05LV_599	*	404	103	202	101	404	202	303	204	101	303	202	202	103	202	303	202	202	101	0	202	102	303	303	103	103	303	404	103	204	103	102	404	303	202	204	303	303	102	202	202	404	204	204	0	404	303	203	202
05LV_601	*	404	101	202	101	404	202	303	204	101	303	204	204	101	202	303	202	202	101	101	202	102	103	303	103	103	304	404	101	202	103	202	204	303	202	404	303	303	102	202	202	404	204	204	103	404	101	303	202
05LV_602	*	404	103	303	101	404	202	303	204	101	303	404	204	103	202	303	202	202	101	103	202	101	303	303	103	103	304	404	101	202	303	202	404	303	202	404	303	103	102	202	202	404	204	204	103	202	303	203	202
05LV_604	*	404	101	202	101	304	202	303	204	101	303	404	202	103	202	303	102	202	103	101	202	102	303	303	103	103	304	404	103	204	303	202	204	303	202	204	303	103	102	202	202	404	404	204	103	204	303	203	204
05LV_605	*	0	103	202	101	404	202	103	204	202	303	404	202	101	202	303	102	404	103	103	203	102	303	303	103	303	303	404	103	404	103	202	204	203	202	202	303	103	102	404	202	404	404	204	103	404	303	203	204
05LV_607	*	404	103	203	101	404	204	303	204	202	303	204	202	101	202	303	202	202	103	101	202	102	101	303	101	101	303	404	103	202	303	202	404	203	202	204	303	303	102	202	202	404	404	204	103	404	101	303	202
05LV_608	*	404	103	202	101	404	202	303	204	0	303	404	202	303	202	303	202	202	101	101	203	101	303	303	103	101	303	404	101	204	101	202	404	203	202	204	303	303	102	202	202	404	204	204	103	404	303	203	202
05LV_610	*	404	101	202	101	404	202	303	204	101	303	204	202	101	202	303	202	202	101	103	202	102	303	303	103	103	304	404	103	204	303	202	204	303	202	204	303	303	102	202	202	404	404	204	103	404	101	303	0
05LV_611	*	404	303	202	101	404	204	303	204	101	303	204	204	103	202	303	202	202	101	303	303	202	103	303	103	101	304	404	103	202	103	202	404	303	202	204	303	303	102	204	404	404	204	204	0	404	103	203	204
05LV_613	*	404	303	203	101	304	204	103	0	202	303	204	202	101	202	303	202	202	103	101	203	101	103	303	103	103	303	404	303	202	303	202	404	303	202	404	303	101	101	202	202	404	204	204	101	404	303	303	204
05LV_614	*	404	303	202	101	304	202	303	404	202	303	204	202	103	202	303	202	202	101	103	202	102	303	303	103	101	404	404	103	204	303	202	404	303	202	404	303	303	102	404	202	404	404	204	103	404	101	303	202
05LV_616	*	404	303	202	101	404	204	103	202	101	303	204	202	101	202	303	102	404	101	303	202	101	303	303	303	101	303	404	103	202	103	202	404	303	202	404	303	303	101	204	202	404	404	0	101	404	303	303	202
05LV_617	*	404	103	202	101	404	202	103	204	101	303	404	204	103	202	303	202	202	103	303	203	202	303	303	303	101	303	404	103	404	101	202	404	303	202	204	303	103	0	404	202	404	404	204	101	404	101	203	202
05LV_619	*	404	103	203	101	404	404	303	204	202	303	404	202	303	202	303	102	202	101	101	203	101	103	303	103	101	303	404	101	202	101	202	404	202	202	404	303	103	102	404	202	404	404	204	103	404	303	203	202
05LV_620	*	404	303	202	101	304	202	303	204	101	303	202	202	101	202	303	202	202	101	101	203	102	303	303	103	101	303	404	101	202	303	202	404	203	202	202	303	303	102	202	202	404	204	204	101	404	101	303	202
05LV_622	*	404	303	303	101	303	202	303	0	101	303	404	202	101	202	303	202	202	101	101	203	101	303	303	103	101	303	404	303	202	303	202	202	303	202	202	303	101	101	202	202	404	404	204	101	404	103	303	202
05LV_625	*	304	103	203	101	304	202	303	204	202	303	204	202	103	204	303	102	202	101	101	202	101	103	303	103	101	303	404	303	202	103	101	204	203	202	404	303	303	102	202	202	202	404	204	103	404	101	203	202
05LV_626	*	0	101	303	101	404	202	303	204	202	303	404	204	103	202	303	202	202	101	101	202	202	303	303	103	303	303	404	101	204	303	102	404	303	202	404	303	303	102	204	202	404	204	204	103	404	101	303	202
05LV_628	*	404	303	303	101	404	202	303	204	101	303	404	202	103	202	303	202	202	101	101	202	102	303	303	0	103	404	404	101	202	303	202	404	303	202	204	303	303	102	202	202	404	404	0	103	404	101	303	204
05LV_629	*	404	103	202	101	304	204	303	204	101	303	204	202	101	202	303	202	202	101	101	202	101	303	303	303	303	303	404	101	204	101	202	404	303	202	204	303	303	102	202	202	204	404	204	101	404	303	303	202
05LV_631	*	404	303	202	101	404	202	303	204	102	303	202	202	103	202	303	202	202	101	303	202	101	103	303	101	103	304	404	303	404	103	202	404	303	102	204	303	303	102	202	202	404	404	204	103	404	103	303	404
05LV_632	*	404	303	202	101	304	204	303	204	202	303	204	204	103	202	303	202	204	101	101	202	101	303	303	103	103	303	404	303	202	303	102	404	303	202	404	303	303	102	204	202	404	204	204	101	404	103	203	202
05LV_634	*	304	103	202	101	404	202	303	204	101	303	404	202	103	202	303	202	404	101	303	202	101	103	303	103	103	303	404	103	204	303	102	404	203	202	204	303	303	102	204	202	404	404	204	103	404	103	203	202
05LV_635	*	404	101	202	101	404	202	103	204	101	303	204	204	101	202	303	202	202	101	101	203	101	103	303	103	101	303	404	101	204	101	202	404	203	202	204	303	303	102	404	202	404	404	204	103	404	303	303	202
05LV_637	*	404	103	203	101	304	202	303	204	101	303	202	204	103	202	303	202	202	101	303	202	101	303	303	103	103	303	404	103	204	303	202	404	303	202	202	303	303	102	204	202	204	204	204	103	404	103	203	202
05LV_638	*	404	303	202	101	304	204	303	204	101	303	202	204	101	202	303	202	202	103	303	303	101	103	303	103	101	303	404	101	204	303	202	204	303	102	204	303	303	102	202	202	204	404	204	103	404	101	303	204
05LV_640	*	404	303	202	101	304	202	303	404	202	303	404	204	103	202	304	102	202	101	303	202	102	303	303	103	101	303	404	101	202	303	202	404	203	202	202	303	303	102	202	202	404	404	204	101	404	101	203	202
05LV_641	*	404	103	202	101	304	202	303	404	101	303	404	204	303	202	303	202	202	103	101	202	102	103	303	103	101	303	404	101	202	303	202	404	303	202	204	303	303	102	204	202	204	202	204	103	404	101	203	404
05LV_643	*	404	103	202	101	304	204	303	202	0	303	404	404	101	202	303	102	404	101	101	202	0	303	303	303	103	303	404	101	404	303	202	204	203	202	204	303	303	101	202	202	404	404	202	101	0	303	303	202
05LV_644	*	304	103	303	101	303	202	303	204	101	303	404	204	103	202	303	202	202	101	101	202	101	303	303	103	101	303	404	303	202	101	202	204	303	202	404	303	303	102	204	202	404	404	204	103	404	101	303	202
05LV_646	*	404	103	202	101	404	202	303	204	101	303	202	204	103	202	303	202	202	101	101	202	101	303	303	103	101	303	404	103	202	101	202	204	303	202	404	303	103	0	202	202	404	404	204	101	204	103	303	204
05LV_647	*	404	303	203	101	404	202	303	204	101	303	404	202	103	202	303	102	404	103	101	203	101	303	303	103	101	304	404	101	202	303	102	404	203	202	204	303	303	102	204	202	204	202	204	0	404	103	203	202
16LV_229	*	0	103	202	102	404	202	303	204	101	303	404	204	303	202	303	202	202	101	303	202	101	303	303	103	103	303	404	103	404	103	102	202	203	202	204	303	303	102	202	204	404	202	202	101	404	101	303	204
16LV_231	*	404	303	203	101	404	202	103	204	102	303	404	204	303	202	303	202	204	101	103	202	102	103	303	101	103	304	404	103	204	303	202	404	203	202	202	303	303	102	202	204	204	404	202	101	404	101	203	204
16LV_232	*	304	103	303	101	404	202	303	204	101	303	204	204	303	204	303	102	204	101	103	203	101	103	303	101	103	303	404	101	202	303	202	404	303	202	0	303	103	102	202	204	404	204	202	101	404	101	203	204
16LV_233	*	404	103	203	102	404	202	303	204	101	303	404	204	303	202	303	102	204	101	103	202	101	303	303	103	103	304	404	103	204	103	202	204	203	202	404	303	303	102	202	204	404	404	202	101	404	103	303	204
16LV_235	*	404	303	203	101	303	202	303	204	101	303	204	204	303	404	303	202	202	101	101	203	101	103	303	103	101	303	404	303	404	303	202	204	303	202	202	303	303	102	204	204	404	204	202	101	404	101	203	204
16LV_236	*	404	101	203	102	304	202	103	204	101	303	404	204	303	204	303	202	202	101	101	203	101	303	303	103	101	303	404	101	202	103	202	204	303	202	204	303	303	102	202	204	404	404	202	101	404	101	203	204
16LV_237	*	404	103	202	102	404	202	303	204	101	303	204	204	303	204	303	202	202	101	101	202	101	103	303	103	101	303	404	101	202	303	202	0	303	202	0	103	303	102	204	204	404	404	202	101	202	101	303	204
16LV_240	*	404	303	203	101	404	202	303	204	101	303	202	204	303	202	303	202	202	101	303	203	101	303	303	103	101	303	404	103	202	303	202	404	203	202	0	303	303	101	202	204	404	404	202	101	404	103	303	204
16LV_241	*	304	103	202	102	404	202	303	204	202	303	404	204	303	202	303	102	202	103	101	203	102	103	303	103	103	304	404	101	202	101	102	404	303	202	204	303	303	102	204	204	404	204	202	101	404	303	203	204
16LV_242	*	404	103	202	101	404	202	103	204	101	303	202	204	303	404	304	202	202	101	0	303	101	303	303	103	103	303	404	103	404	303	102	204	303	202	204	303	303	102	404	204	404	404	202	101	202	103	303	204
16LV_243	*	0	101	203	202	404	202	303	202	101	303	404	204	303	202	303	202	202	101	101	203	102	303	303	103	101	404	404	103	404	101	102	204	203	202	0	303	303	0	202	204	404	404	202	101	404	101	303	204
16LV_244	*	404	103	202	102	304	202	303	202	101	303	404	204	303	204	304	202	202	303	303	203	202	303	303	103	101	303	404	101	202	103	202	204	203	202	0	303	303	101	202	0	404	404	202	101	404	101	303	204
16LV_245	*	404	303	202	101	404	202	303	202	101	303	404	204	303	202	303	202	202	0	101	203	202	103	303	303	101	303	404	103	202	303	102	0	303	102	202	303	303	101	202	202	0	404	202	101	404	103	303	204
16LV_248	*	404	101	303	101	404	202	303	202	101	303	404	204	303	202	303	102	202	103	101	202	102	303	303	103	101	303	404	101	202	303	202	404	203	202	0	303	103	0	202	202	404	404	202	101	404	303	303	204
16LV_250	*	404	303	202	101	404	202	103	204	101	303	204	204	303	204	303	202	202	303	303	202	102	303	303	103	103	303	404	103	202	103	202	404	203	202	0	303	303	102	404	204	404	404	202	101	404	101	303	204
16LV_251	*	404	103	203	202	304	202	103	204	101	303	404	204	303	202	303	202	202	101	303	203	102	303	303	103	103	303	404	101	204	103	202	202	303	202	0	303	303	102	202	204	404	404	202	101	404	103	203	204
16LV_253	*	404	103	202	202	404	202	303	202	101	303	204	204	303	202	303	202	202	101	103	202	102	303	303	303	101	303	404	101	404	303	102	404	303	202	0	303	303	101	404	202	0	404	202	101	404	103	303	204
16LV_254	*	404	101	202	101	304	202	103	204	101	303	202	204	303	204	303	202	202	103	303	202	102	303	303	103	101	303	404	303	202	303	202	404	202	202	0	303	303	102	204	204	404	404	202	101	404	101	303	204
16LV_255	*	404	303	202	101	404	202	303	204	101	303	404	204	303	202	303	102	202	101	101	203	102	303	303	103	101	303	404	103	404	101	202	404	303	202	404	303	103	102	404	204	404	204	202	101	404	303	303	204
16LV_256	*	404	303	203	102	404	202	303	202	101	303	404	204	303	204	303	202	202	103	303	202	202	303	303	303	103	303	404	101	404	303	101	404	303	202	0	303	303	101	202	202	404	404	202	101	404	103	303	204
16LV_257	*	404	103	203	102	304	202	303	204	102	303	404	204	103	404	303	202	202	101	0	202	202	303	303	103	103	303	404	103	204	103	202	404	303	102	404	303	303	102	204	204	404	404	202	101	404	303	203	204
16LV_258	*	404	103	203	102	404	202	303	204	101	303	404	204	103	202	303	202	202	101	103	202	101	303	303	103	101	303	404	103	204	303	202	404	203	202	404	303	303	102	202	204	404	404	202	101	404	303	203	204
16LV_259	*	404	103	203	202	304	202	103	204	202	303	404	204	103	202	303	202	202	101	303	203	102	103	303	103	103	303	404	103	202	303	202	404	303	202	404	303	303	202	204	0	404	204	202	101	404	101	303	204
16LV_260	*	404	103	202	101	304	202	103	204	101	303	404	204	303	202	303	102	202	101	101	203	101	103	303	103	103	303	404	101	202	101	102	204	303	202	204	103	303	102	202	204	404	204	202	101	404	101	303	204
16LV_262	*	404	303	203	101	404	202	303	204	202	303	204	204	103	404	303	202	202	101	101	203	102	103	303	103	103	303	404	103	204	303	0	404	303	202	0	303	103	102	204	0	404	404	202	101	404	103	203	204
16LV_263	*	304	303	303	101	304	202	103	204	101	303	204	204	303	202	303	102	204	103	101	203	0	303	303	103	303	304	404	103	202	103	202	404	303	202	0	303	103	102	202	204	404	404	202	101	404	103	203	204
16LV_264	*	404	303	202	202	404	202	303	204	202	303	204	204	303	202	303	102	202	101	101	303	101	303	303	101	103	303	404	101	202	303	102	404	303	202	0	303	303	102	204	204	404	404	202	101	404	101	303	204
16LV_265	*	404	103	203	102	404	202	303	204	101	0	204	204	303	204	303	202	202	103	103	203	101	103	303	103	101	303	404	103	202	303	101	204	203	202	202	303	303	102	204	204	404	404	202	101	404	103	203	204
16LV_266	*	0	103	203	102	304	202	103	204	102	303	204	204	103	202	303	102	202	101	101	203	102	303	303	103	103	303	404	103	202	103	0	404	303	202	202	103	303	102	204	204	404	204	202	101	404	101	303	204
16LV_267	*	404	303	202	102	404	202	303	202	202	303	404	204	303	204	303	202	202	101	101	202	101	303	303	101	103	303	404	101	202	103	202	404	303	202	404	303	303	101	204	202	0	204	202	101	404	101	203	202
16LV_268	*	404	101	203	102	404	202	303	204	101	303	202	204	303	204	303	202	204	103	101	202	101	303	303	103	303	303	404	101	204	303	202	404	203	202	404	303	103	102	204	204	404	202	202	101	404	303	203	204
16LV_269	*	404	103	202	202	304	202	103	204	101	303	204	204	303	204	303	202	202	101	0	303	102	303	303	103	101	303	404	103	404	103	102	404	203	202	404	303	303	102	204	204	404	404	202	101	404	103	303	204
16LV_270	*	404	103	202	101	304	202	303	204	101	303	404	204	303	204	303	102	202	103	101	202	102	103	303	103	103	304	404	101	202	101	202	204	303	202	0	303	303	102	204	204	404	404	202	101	404	101	303	204
16LV_271	*	304	101	202	202	404	202	303	202	202	303	404	204	303	202	303	202	202	0	101	203	101	303	303	303	103	303	404	101	202	103	102	404	303	202	0	303	103	101	202	202	0	404	202	101	404	101	303	202
16LV_272	*	404	303	202	202	404	202	303	204	101	303	204	204	303	204	303	202	202	101	0	203	101	303	303	101	101	303	404	101	202	103	202	404	303	202	0	303	303	102	204	204	404	404	204	101	404	103	303	204
16LV_273	*	404	303	303	101	404	202	303	204	101	303	204	204	303	202	303	102	202	103	101	202	202	101	303	103	303	304	404	103	202	303	202	202	303	202	204	303	303	102	204	404	404	404	202	101	404	101	303	204
16LV_274	*	404	303	202	101	304	202	303	204	102	303	404	204	303	202	303	202	202	103	101	203	102	103	303	103	103	303	404	101	202	103	102	404	203	202	404	303	303	102	202	204	404	404	202	101	404	103	203	204
16LV_275	*	303	103	303	101	404	202	303	204	102	303	404	204	303	204	303	202	202	303	103	202	101	303	303	103	103	303	404	101	204	303	202	204	303	202	202	303	103	202	202	204	404	404	202	101	404	101	303	204
16LV_276	*	404	103	202	101	404	202	303	204	101	303	404	204	303	202	303	202	202	101	101	202	101	303	303	103	101	303	404	303	202	103	202	404	303	202	204	303	303	102	404	204	404	204	202	101	404	303	303	204
16LV_277	*	404	103	202	202	404	202	303	202	202	303	202	204	303	202	303	102	202	103	0	203	101	103	303	0	303	303	404	103	204	101	202	204	203	202	0	303	303	101	202	0	404	404	202	101	404	103	203	0
16LV_278	*	404	303	202	202	304	202	303	204	102	303	404	204	303	404	303	202	204	103	103	203	102	303	303	103	103	303	404	103	204	101	202	204	303	202	404	303	303	102	204	204	404	204	202	101	404	101	303	204
16LV_279	*	404	103	202	202	404	202	303	204	101	303	404	204	303	202	303	202	202	101	101	202	101	103	303	103	101	303	404	101	202	103	202	404	303	202	404	303	103	102	204	204	404	204	202	101	404	103	203	204
16LV_280	*	404	101	303	102	404	202	103	204	101	303	404	204	303	202	303	202	202	101	101	303	202	303	303	103	103	303	404	303	0	103	102	204	203	202	0	303	303	102	202	204	404	404	202	101	404	303	203	204
16LV_281	*	404	103	202	101	304	202	303	204	102	303	404	204	303	204	303	202	202	101	101	303	102	303	303	103	103	303	404	101	202	303	202	404	203	202	404	303	103	102	202	204	404	202	202	101	404	101	203	204
16LV_282	*	404	303	202	102	404	202	303	204	102	303	404	204	303	204	303	202	202	101	303	203	101	103	303	103	101	303	404	103	204	103	202	404	303	202	404	303	103	101	204	204	404	404	204	101	404	101	203	204
16LV_283	*	404	103	202	102	404	202	303	204	202	303	202	204	303	202	303	202	204	101	101	203	101	101	303	103	103	303	404	101	202	101	102	404	203	202	204	303	103	102	202	204	404	204	202	101	404	103	203	204
16LV_284	*	404	103	202	202	304	202	303	404	101	303	404	204	303	204	304	202	404	101	101	202	101	303	303	103	103	303	404	101	202	303	202	404	203	202	202	303	303	102	204	204	404	404	202	101	202	103	303	204
16LV_285	*	404	303	202	202	404	202	303	204	101	303	204	204	101	204	303	202	404	101	101	202	101	103	303	103	101	303	404	303	404	103	202	404	303	102	0	303	303	102	404	204	404	404	202	101	404	101	303	204
16LV_286	*	404	103	202	202	404	202	103	204	101	303	202	204	303	202	303	202	202	303	101	203	101	303	303	103	101	303	404	103	404	303	202	404	303	202	404	303	303	102	202	204	404	404	202	101	404	101	303	204
16LV_288	*	404	303	202	101	404	202	103	204	102	303	404	204	303	204	303	202	204	101	0	202	102	103	303	103	101	303	404	101	202	103	202	404	203	202	404	303	303	102	404	204	404	404	202	101	404	103	303	204
16LV_289	*	404	303	303	102	404	202	303	204	102	303	202	204	303	202	303	202	202	101	0	203	202	303	303	103	103	303	404	101	204	0	102	404	303	202	0	303	303	202	202	204	404	404	202	101	404	103	303	204
16LV_290	*	404	303	202	202	304	202	303	204	101	303	404	204	303	204	303	202	202	101	101	203	202	103	303	103	103	303	404	103	202	303	102	204	303	202	204	303	303	202	202	204	404	404	202	101	404	303	303	204
16LV_291	*	404	101	202	202	404	202	303	204	102	303	404	204	303	202	303	202	204	103	101	303	102	103	303	103	303	303	404	103	202	303	102	404	303	202	0	303	101	202	204	204	404	204	204	101	404	103	303	204
16LV_292	*	404	101	202	101	404	202	303	204	202	303	404	204	303	404	303	202	202	103	101	202	101	303	303	103	101	304	404	101	202	303	102	404	303	202	204	303	303	102	404	204	404	404	202	101	404	303	203	204
16LV_293	*	404	103	203	101	404	202	303	204	101	303	404	204	303	204	303	202	202	101	101	303	101	303	303	103	101	303	404	103	204	303	202	204	303	202	204	303	303	102	202	204	404	204	202	101	404	303	303	204
16LV_294	*	404	303	202	102	304	202	103	204	102	303	404	204	303	204	303	202	202	101	103	202	101	103	303	101	101	303	404	101	404	101	202	204	202	202	0	303	303	102	202	204	404	404	202	101	404	103	303	204
16LV_295	*	404	101	0	102	404	202	303	202	101	303	404	204	303	202	303	202	202	0	101	203	102	303	303	303	101	0	404	303	404	303	202	404	303	102	202	303	303	101	202	202	0	404	202	101	404	103	303	202
16LV_296	*	404	101	202	102	404	202	303	204	101	303	404	204	303	204	303	202	202	101	101	303	101	103	303	103	103	303	404	103	202	303	202	204	303	202	0	303	303	102	204	204	404	204	202	101	404	101	203	204
16LV_297	*	404	103	202	102	304	202	303	204	101	303	404	204	303	204	303	202	204	101	101	203	102	303	303	103	103	303	404	101	202	103	202	204	202	202	0	303	303	102	404	204	404	404	202	101	404	303	303	204
16LV_298	*	404	303	202	102	304	202	303	204	101	303	404	204	303	204	303	202	202	101	101	203	202	103	303	103	103	303	404	103	202	303	102	204	303	202	204	303	303	202	202	204	404	404	202	101	404	303	303	204
16LV_299	*	404	103	203	102	404	202	303	204	101	303	204	204	303	204	303	102	202	101	0	202	101	103	303	103	103	303	404	103	202	103	202	202	303	202	404	303	303	102	202	204	404	204	202	101	404	103	303	204
16LV_300	*	404	101	202	101	404	202	103	0	101	303	204	204	303	204	303	202	202	303	103	202	101	303	303	103	303	303	404	103	202	303	202	202	203	202	404	303	303	102	202	204	404	404	204	101	404	103	203	204
16LV_301	*	404	101	202	101	304	202	303	204	101	303	404	204	303	204	303	202	202	101	303	303	102	303	303	103	101	404	404	103	404	303	202	204	303	202	204	303	303	102	204	204	404	404	202	101	202	101	303	204
16LV_303	*	404	303	203	101	304	202	303	204	101	303	204	204	303	204	303	202	202	101	101	202	101	103	303	103	101	303	404	101	202	303	202	404	203	202	202	303	303	0	204	204	404	404	202	101	404	101	303	204
16LV_304	*	404	303	203	202	404	202	303	204	101	303	404	204	303	404	304	202	202	101	101	202	102	103	303	103	101	404	404	101	202	101	202	204	303	202	0	303	303	102	202	204	404	404	202	101	404	103	303	204
16LV_305	*	404	101	202	101	304	202	303	204	101	303	404	204	103	204	303	202	204	101	103	203	102	303	303	103	103	303	404	101	202	303	202	404	303	202	404	103	303	102	202	204	404	204	202	101	404	101	203	204
16LV_306	*	404	103	203	102	404	202	103	204	101	303	204	204	303	202	303	102	202	103	101	203	102	303	303	103	103	303	404	101	204	103	202	404	303	202	202	303	303	102	204	204	404	404	202	101	404	103	303	204
16LV_307	*	404	103	202	102	304	202	303	204	101	303	404	204	303	202	303	102	202	101	101	202	102	103	303	103	103	304	404	303	404	101	202	204	303	202	204	303	303	102	204	204	204	404	202	101	404	101	203	204
16LV_308	*	404	101	202	202	304	202	303	204	101	303	404	204	303	202	303	202	202	101	101	202	102	103	303	103	101	303	404	101	202	103	0	404	303	202	204	303	303	102	202	204	204	404	204	101	404	101	303	204
16LV_309	*	404	103	203	101	304	202	303	204	202	303	204	204	303	204	303	202	204	101	101	202	102	303	303	103	303	303	404	103	404	103	202	404	203	202	404	303	303	102	202	204	404	204	202	101	404	103	303	204
16LV_311	*	404	103	202	102	404	202	303	202	101	303	202	204	303	202	303	202	202	0	303	202	101	303	303	303	101	0	404	0	202	103	101	0	203	202	404	303	0	101	202	202	202	404	202	101	204	303	203	202
16LV_312	*	404	103	202	101	404	202	303	202	202	303	204	204	303	202	304	102	202	0	103	202	101	103	303	303	101	0	404	101	202	303	202	404	203	202	0	303	0	101	202	202	404	404	202	101	404	101	203	0
16LV_313	*	404	303	202	101	404	202	303	204	101	303	404	204	303	202	303	102	202	101	101	202	101	103	303	103	101	304	404	303	202	103	202	404	203	202	404	303	303	102	204	204	404	404	202	101	404	303	303	204
16LV_314	*	0	103	202	101	404	202	103	204	102	303	404	204	303	204	303	202	204	101	101	202	101	103	303	103	101	404	404	101	404	103	202	404	303	202	204	303	303	102	204	204	404	404	202	101	202	103	303	204
16LV_315	*	404	103	202	101	404	202	303	204	102	303	404	204	303	204	303	102	202	101	101	203	102	303	303	101	303	303	404	101	404	103	202	204	303	202	204	303	101	102	202	204	0	204	202	101	404	303	303	204
16LV_316	*	404	101	202	101	304	202	303	204	101	303	404	204	103	204	303	202	202	101	103	303	102	103	303	103	103	303	404	101	204	303	202	204	303	202	0	303	303	102	204	204	404	404	202	101	404	103	303	204
16LV_317	*	404	303	203	202	304	202	303	204	101	303	404	204	303	204	303	202	202	103	103	203	102	303	303	103	101	404	404	101	204	103	202	404	303	202	404	303	303	102	202	204	404	202	202	101	404	303	203	204
16LV_318	*	404	103	202	102	404	202	303	204	101	303	202	204	103	202	303	202	202	101	101	203	202	103	303	103	103	303	404	101	404	103	202	404	303	202	0	303	303	102	202	204	404	404	202	101	404	103	203	204
16LV_319	*	404	103	202	101	304	202	103	204	101	303	202	204	103	202	303	202	202	101	101	203	102	103	303	103	101	303	404	101	404	303	202	202	303	202	404	303	103	102	204	204	404	404	202	101	404	101	303	204
16LV_320	*	404	103	202	102	304	202	303	204	101	303	404	204	303	404	303	202	202	101	101	203	101	303	303	103	101	304	404	101	202	103	102	204	303	202	202	303	303	102	202	204	404	404	202	101	404	103	303	204
16LV_321	*	404	103	202	202	404	202	303	204	101	303	204	204	303	202	303	202	202	101	0	202	102	103	303	103	103	303	404	101	404	101	202	404	203	202	204	303	303	102	202	404	404	404	202	101	404	103	203	204
16LV_322	*	404	103	202	101	404	202	303	204	101	303	204	204	303	202	303	202	404	101	303	202	101	303	303	103	101	303	404	101	202	303	202	204	303	202	404	303	303	102	202	204	404	404	202	101	404	101	203	204
16LV_323	*	404	303	202	102	304	202	303	204	101	303	204	204	303	202	304	202	202	101	101	203	101	103	303	101	103	303	404	103	204	103	202	204	303	202	204	303	303	102	204	204	0	404	202	101	202	101	203	204
16RS_326	*	404	103	203	202	304	202	303	204	101	303	204	404	103	404	303	202	202	101	101	303	202	303	303	303	103	303	404	103	202	303	202	202	203	202	202	303	303	102	404	204	404	404	204	101	404	101	203	204
16RS_327	*	404	103	203	101	404	202	303	204	102	303	404	202	103	204	303	202	202	101	101	203	102	103	303	303	101	303	404	103	204	303	202	204	303	202	0	303	303	101	204	0	204	204	204	101	404	103	303	204
16RS_441	*	404	103	202	101	404	204	303	204	101	303	404	202	103	202	303	202	202	101	101	202	102	103	303	303	101	303	404	101	404	303	202	204	203	202	404	303	303	102	202	204	204	404	204	101	404	103	303	202
16RS_442	*	404	103	203	102	303	202	303	204	101	303	204	204	101	204	303	202	202	101	0	203	102	303	303	103	103	304	404	101	202	103	202	204	303	202	404	303	103	102	202	404	404	204	204	101	404	101	203	202
16RS_443	*	404	103	202	101	304	202	303	204	0	303	404	202	101	202	303	202	202	101	103	202	101	103	303	103	103	303	404	101	204	101	202	404	303	202	204	303	303	102	202	204	204	204	204	101	404	103	303	202
16RS_444	*	404	303	203	101	303	202	303	204	102	303	404	202	101	202	303	102	202	101	101	203	101	303	303	103	101	303	404	303	202	303	102	404	203	202	202	0	303	202	404	204	404	202	204	101	404	101	303	202
16RS_445	*	404	103	202	102	404	202	303	204	101	303	404	204	103	204	303	202	202	101	101	203	101	103	303	303	101	304	404	101	404	303	202	204	303	202	204	303	303	102	202	204	404	204	404	101	404	303	303	204
16RS_447	*	404	103	203	202	404	204	303	204	101	303	404	404	303	202	303	202	202	103	303	203	101	303	303	303	103	304	404	101	204	103	102	204	203	102	404	303	303	102	202	204	404	404	204	101	404	101	303	204
16RS_448	*	304	103	303	101	304	202	303	204	202	303	404	202	103	404	303	202	404	103	101	202	202	303	303	101	103	303	404	101	202	303	202	204	303	202	202	0	303	102	202	204	404	404	204	101	404	101	303	202
16RS_449	*	404	103	202	102	404	204	303	204	101	303	204	204	303	202	303	202	202	101	303	202	101	303	303	303	103	303	404	103	202	103	101	404	303	202	204	303	303	102	204	204	404	404	204	101	404	303	303	202
16RS_450	*	404	303	202	101	404	204	303	204	102	303	404	202	103	202	303	202	202	101	101	303	101	303	303	303	103	303	404	101	202	303	202	204	203	202	404	303	303	102	404	204	404	204	204	101	204	103	203	204
16RS_451	*	404	101	202	101	404	404	303	204	101	303	204	202	101	202	304	102	404	101	103	203	202	303	303	303	101	303	404	101	404	303	101	404	203	202	404	303	303	102	204	204	404	204	204	101	404	103	203	202
16RS_452	*	404	103	303	102	404	204	303	202	102	303	404	204	101	204	303	102	202	101	101	303	102	303	303	303	103	303	404	101	202	101	202	404	203	202	204	303	303	101	202	404	404	404	202	101	404	303	303	202
16RS_453	*	404	303	202	202	303	202	303	204	0	303	204	404	101	204	303	102	202	101	303	203	102	303	303	303	101	303	404	101	202	303	101	204	303	202	204	103	303	102	204	204	404	404	204	101	404	303	303	202
16RS_455	*	404	103	203	202	304	202	103	404	101	303	202	404	103	204	303	202	202	101	303	202	101	103	303	103	101	304	404	103	204	303	101	404	303	202	404	303	101	102	204	204	404	404	204	101	204	303	303	202
16RS_456	*	404	103	202	202	404	202	303	204	0	303	204	404	101	202	303	202	202	101	101	203	102	303	303	303	103	303	404	103	0	103	202	204	303	202	404	303	103	102	202	204	404	404	204	101	404	103	203	202
16RS_457	*	404	103	203	102	404	202	303	204	202	303	404	204	103	202	303	202	202	101	103	202	102	103	303	303	103	303	404	103	202	101	202	204	203	202	204	303	101	102	202	204	404	404	204	101	404	103	303	204
16RS_458	*	404	303	202	102	404	202	303	204	102	303	204	204	101	204	303	202	202	103	303	202	102	303	303	303	103	303	404	303	204	103	101	404	203	202	202	303	103	102	202	204	404	404	404	101	404	101	203	202
16RS_459	*	404	101	203	101	304	204	303	204	101	303	204	202	103	202	303	202	202	103	103	203	102	103	303	303	103	303	404	101	0	303	202	404	303	202	202	103	103	102	202	204	404	204	204	101	404	103	203	204
16RS_460	*	404	103	202	101	304	202	303	204	101	303	204	202	103	204	303	102	202	103	103	203	102	103	303	303	101	304	404	101	204	303	202	204	303	202	204	303	303	102	404	204	404	404	204	101	204	303	303	204
16RS_461	*	404	103	203	202	404	202	303	204	102	303	404	404	103	202	303	202	202	101	303	203	101	103	303	303	103	303	404	101	202	103	102	204	303	202	202	303	303	102	204	204	404	404	204	101	204	103	303	202
16RS_462	*	404	103	203	101	404	202	303	204	101	303	404	202	101	202	303	102	404	101	101	303	101	101	303	303	101	304	404	101	202	101	202	404	303	202	202	303	303	101	202	204	404	204	0	101	404	103	303	204
16RS_463	*	404	103	203	101	404	404	303	204	101	303	204	202	101	204	303	202	202	103	103	202	102	103	303	303	101	304	404	101	202	103	102	204	202	202	404	303	303	102	204	204	204	202	204	101	404	101	303	202
16RS_464	*	404	103	202	101	303	202	103	204	101	303	204	202	103	202	304	102	202	101	101	303	102	103	303	303	103	304	404	103	202	103	202	202	203	202	204	103	303	102	202	204	404	404	204	101	204	103	303	202
16RS_465	*	404	103	202	101	404	202	303	204	101	303	404	202	101	404	303	101	202	101	101	202	102	303	303	303	101	303	404	103	404	303	202	204	203	202	204	303	303	102	404	204	404	204	204	101	404	101	203	204
16RS_465-1	*	404	303	202	102	303	202	303	204	101	303	204	204	103	202	303	202	202	101	101	203	101	103	303	303	101	303	404	103	202	101	202	204	203	202	404	303	303	102	204	204	404	404	204	101	404	303	303	202
16RS_465-2	*	0	101	203	202	303	202	103	204	101	303	204	404	103	204	303	202	202	103	101	303	102	103	303	303	103	303	404	101	0	103	101	404	303	202	202	303	103	102	202	204	404	404	204	101	204	303	203	204
16RS_465-3	*	404	101	202	102	404	204	303	204	0	303	404	204	103	202	304	101	202	101	101	202	202	103	303	303	103	303	404	101	204	101	102	404	303	202	404	303	303	102	404	204	404	404	204	101	404	103	203	202
16RS_465-4	*	404	303	202	101	304	204	303	204	101	303	404	202	303	202	303	202	404	303	101	202	101	303	303	303	103	303	404	103	202	103	102	204	303	202	204	303	303	102	202	204	404	404	204	101	204	303	303	202
16RS_465-5	*	404	103	202	202	303	204	303	204	101	303	404	404	103	202	303	102	202	101	101	202	101	303	303	303	101	303	404	101	202	103	202	404	303	202	202	303	303	102	202	204	404	404	204	101	404	101	203	202
16RS_465-6	*	404	101	202	102	304	204	303	204	101	303	204	204	103	204	303	202	202	101	101	303	101	101	303	303	103	303	404	101	202	103	101	404	203	202	204	303	303	102	202	204	404	404	204	101	404	101	203	204
16RS_465-7	*	404	303	202	202	404	202	103	204	0	303	404	404	103	202	303	202	202	101	101	203	101	303	303	303	101	303	404	103	202	103	202	204	203	202	202	303	303	102	404	204	404	204	204	101	404	103	303	202
16RS_465-8	*	404	103	303	101	304	202	303	204	101	303	404	202	101	204	303	202	202	101	101	203	101	303	303	303	101	304	404	103	202	303	202	404	303	202	204	303	303	102	202	204	404	404	204	101	404	303	303	202
16RS_465-9	*	404	303	203	102	404	202	303	204	102	303	204	204	101	202	303	202	202	101	101	203	102	103	303	303	103	303	404	103	202	303	101	404	303	202	404	303	103	102	204	204	404	404	204	101	404	103	303	202
16RS_465-10	*	404	303	203	101	404	202	303	204	101	303	404	202	101	202	304	202	202	103	103	203	102	303	303	303	103	303	404	101	202	303	202	404	303	202	204	303	303	102	204	204	404	404	204	101	204	101	203	202
16RS_465-11	*	404	101	203	101	303	202	103	204	101	303	404	202	103	204	303	202	202	103	101	202	102	303	303	303	303	303	404	101	204	103	202	204	303	202	204	303	103	0	404	0	404	404	204	101	404	101	303	202
16RS_465-12	*	404	103	202	102	404	204	303	204	101	303	404	204	303	202	304	202	202	103	101	202	101	303	303	303	101	303	404	303	404	103	202	404	303	202	404	303	103	101	204	0	404	404	204	101	204	103	303	202
16RS_465-13	*	404	303	203	202	404	202	303	204	202	303	404	404	303	202	303	102	202	103	101	303	101	303	303	303	103	303	404	101	202	103	102	404	303	202	404	303	303	102	204	204	404	404	204	101	404	101	303	204
16RS_465-14	*	404	103	203	102	404	404	303	204	202	303	404	204	101	202	303	202	202	101	0	303	102	103	303	303	103	303	404	101	202	303	101	404	203	202	404	303	303	102	404	204	404	404	204	101	404	101	303	202
16RS_465-15	*	404	303	203	102	404	202	303	204	101	303	204	204	103	204	303	202	202	101	101	202	102	103	303	303	103	303	404	103	202	303	202	204	303	102	204	303	303	102	204	204	404	404	204	101	404	101	303	202
16RS_465-16	*	404	303	202	202	404	202	303	204	102	303	204	404	103	204	303	202	404	101	303	203	101	103	303	303	101	303	404	103	202	101	202	204	303	202	202	303	303	102	204	204	404	404	204	101	404	101	303	202
16RS_465-17	*	404	303	203	101	303	202	303	404	101	303	204	202	103	204	303	202	404	101	0	202	101	103	303	303	103	404	404	101	202	101	202	404	203	202	404	303	303	101	404	202	404	404	202	101	404	103	303	204
16RS_465-18	*	404	303	202	102	404	202	103	204	101	303	404	204	103	204	303	202	202	101	101	202	102	103	303	303	103	303	404	101	204	103	202	404	203	202	204	303	103	102	404	204	404	404	204	101	404	101	203	204
16RS_465-19	*	404	303	203	101	404	202	303	204	101	303	404	202	103	202	303	202	202	101	101	203	102	103	303	303	101	304	404	101	202	303	202	204	203	202	404	303	303	102	202	204	404	202	204	101	404	101	303	202
16RS_465-20	*	404	103	303	202	304	202	303	404	101	303	404	404	101	204	303	202	202	103	101	203	102	303	303	303	101	303	404	0	404	103	202	204	203	202	204	303	303	102	204	204	404	204	204	101	404	303	303	204
16RS_465-22	*	404	303	303	101	404	204	303	202	101	303	404	202	103	204	304	202	202	101	101	202	102	103	303	303	103	303	404	103	202	103	202	204	203	202	204	303	103	101	204	202	404	404	202	101	404	103	203	202
16RS_465-23	*	404	303	203	101	304	204	103	204	101	303	404	202	303	204	303	202	202	101	303	202	101	303	303	303	101	303	404	101	202	103	202	202	303	202	204	303	303	102	202	204	404	404	204	101	204	101	303	202
16RS_465-24	*	404	303	203	202	304	202	303	204	0	303	204	404	101	204	303	202	202	101	103	202	101	103	303	303	101	404	404	303	404	101	102	404	202	202	202	303	103	102	204	204	404	404	204	101	404	101	203	202
16RS_465-25	*	404	303	203	101	404	202	303	204	101	303	404	202	303	202	404	202	404	101	101	202	101	303	303	303	101	303	404	303	202	103	202	404	303	202	202	303	103	202	202	204	404	204	204	101	204	101	303	202
16RS_465-26	*	304	101	203	102	304	202	303	204	101	303	204	204	303	204	303	202	202	101	101	203	202	303	303	303	103	304	404	101	202	101	202	204	303	202	204	303	303	102	202	204	404	204	204	101	404	303	303	202
16RS_465-27	*	404	103	203	101	304	202	303	204	101	303	404	202	303	202	303	202	202	303	101	202	101	303	303	303	103	304	404	303	0	103	102	404	303	102	204	303	103	102	202	204	404	204	204	101	202	101	203	204
16RS_465-29	*	404	103	202	102	304	202	303	204	0	303	404	204	103	202	303	202	404	101	101	203	102	303	303	303	101	304	404	103	204	103	102	404	303	202	204	303	303	102	202	204	404	404	204	101	404	103	203	202
16RS_465-31	*	404	303	203	102	304	204	303	204	102	303	204	204	103	204	303	202	202	101	101	202	102	303	303	303	303	303	404	303	202	303	202	204	203	202	404	303	303	102	204	204	404	404	204	101	404	103	203	202
16RS_465-32	*	404	103	203	102	404	202	303	204	101	303	204	204	103	202	303	102	202	101	103	202	101	303	303	303	103	303	404	103	404	103	202	404	203	202	204	303	303	102	202	204	404	204	204	101	404	103	303	204
16RS_465-37	*	404	303	203	202	404	204	303	204	202	0	204	404	101	202	304	102	202	303	101	203	101	303	303	303	101	303	404	101	202	303	202	404	0	202	204	303	103	102	204	204	404	404	204	101	404	303	303	202
16RS_465-38	*	404	303	202	102	404	202	303	204	101	303	404	204	103	202	303	202	202	103	101	202	101	103	303	303	101	303	404	103	0	103	202	204	203	202	202	303	303	102	202	204	202	204	204	101	404	103	303	202
16RS_465-39	*	304	103	202	202	404	202	303	204	101	303	204	404	103	204	303	202	404	103	101	203	101	303	303	303	101	304	404	101	202	303	0	404	303	202	404	303	103	102	204	204	404	204	204	101	404	101	203	202
16RS_465-40	*	404	103	202	101	404	202	303	204	101	303	204	202	103	404	303	202	202	101	303	203	102	101	303	303	101	303	404	103	202	103	202	404	203	202	404	303	303	202	202	204	404	204	204	101	404	103	303	404
16RS_465-41	*	404	103	202	102	304	204	303	204	101	303	404	204	303	202	304	202	202	101	0	203	101	303	303	303	103	303	404	101	204	103	202	204	303	202	204	303	303	102	0	204	404	204	204	101	404	101	303	202
16RS_465-42	*	404	101	203	102	404	202	303	204	102	303	404	204	303	404	303	202	202	103	101	203	101	103	303	303	101	303	404	103	202	303	202	404	303	102	404	303	303	102	204	204	404	404	204	101	404	103	303	202
16RS_465-43	*	404	101	303	202	404	202	303	202	101	303	404	404	103	202	303	202	202	101	101	203	101	103	303	103	103	303	404	103	202	101	202	404	303	102	204	303	303	101	0	202	404	204	202	101	404	101	303	204
16RS_465-45	*	404	303	202	101	404	202	303	202	101	303	204	202	303	204	303	202	404	101	103	202	202	303	303	303	103	0	404	103	404	303	202	404	203	202	202	303	303	101	204	202	404	202	202	101	404	103	303	202
16RS_465-46	*	404	103	203	202	404	202	303	204	0	303	204	404	303	202	303	202	404	101	0	202	102	103	303	303	101	304	404	303	0	303	102	404	303	202	204	303	303	102	204	204	404	404	204	101	204	101	203	202
16RS_465-47	*	404	103	203	202	404	202	303	204	0	303	202	404	103	202	303	202	202	101	101	203	102	103	303	303	101	303	404	101	202	103	202	404	203	202	202	303	103	102	202	204	404	404	204	101	404	103	303	204
16RS_465-48	*	404	103	202	102	404	204	303	204	202	303	204	204	103	202	303	102	204	101	303	202	101	303	303	303	101	304	404	101	204	303	202	204	303	202	204	303	303	102	202	204	404	404	204	101	404	101	203	202
16RS_465-49	*	404	103	303	202	303	202	303	204	101	303	404	404	103	202	303	202	202	103	303	202	102	303	303	303	101	404	404	303	202	303	202	204	303	202	204	303	303	102	204	202	404	404	204	101	204	103	303	202
16RS_465-50	*	404	103	203	101	304	202	303	204	101	303	404	202	303	202	303	102	202	101	303	203	101	303	303	303	101	303	404	103	204	103	102	404	303	202	204	303	303	102	204	204	404	204	204	101	404	103	303	202
16RS_465-51	*	404	103	203	202	304	202	303	204	101	303	404	404	303	204	303	202	202	101	103	202	101	303	303	303	103	303	404	103	0	303	202	204	203	202	204	303	303	102	202	204	204	404	204	101	404	303	203	202
16RS_465-52	*	404	103	203	102	404	204	103	204	101	303	204	204	303	202	304	202	202	101	101	203	101	303	303	303	103	303	404	103	202	101	101	204	303	202	404	303	103	102	202	204	404	404	204	101	204	103	303	204
16RS_465-53	*	404	303	202	102	304	202	303	204	101	303	202	204	103	202	303	202	202	101	101	202	101	303	303	103	101	303	404	103	202	303	202	404	203	202	202	0	303	102	202	204	404	404	204	101	404	303	203	202
16RS_465-54	*	404	303	203	101	304	204	303	204	101	303	204	202	103	204	304	202	202	101	0	202	101	303	303	103	103	404	404	101	204	103	202	204	203	202	204	303	303	102	202	204	404	404	204	101	404	101	303	204
16RS_465-55	*	404	303	203	101	404	202	303	204	102	303	204	202	103	204	303	202	202	101	101	203	101	103	303	303	103	303	404	101	202	103	202	404	303	202	202	303	303	102	204	204	404	404	204	101	404	103	303	202
16RS_465-56	*	404	103	202	202	404	204	303	204	101	303	404	404	101	404	303	202	202	101	101	202	101	103	303	303	303	303	404	103	202	303	102	404	203	202	202	303	103	102	204	204	404	404	204	101	404	103	303	404
16RS_465-57	*	404	303	202	101	304	202	303	204	101	303	404	202	103	204	303	202	202	103	103	202	102	303	303	303	103	303	404	103	404	103	202	404	203	202	204	303	103	102	204	204	404	404	204	101	204	103	303	204
16RS_465-58	*	404	303	202	102	304	204	303	204	202	303	204	204	101	202	303	102	202	101	101	202	101	103	303	303	103	303	404	103	202	103	102	404	203	202	404	303	303	102	404	204	404	404	204	101	404	103	303	202
16RS_465-59	*	304	103	203	102	404	202	303	204	101	303	404	204	103	404	304	202	202	303	101	202	101	303	303	303	101	303	404	101	204	103	102	404	303	102	404	303	103	102	202	204	404	404	204	101	204	103	303	204
16RS_465-60	*	404	303	202	102	303	204	303	204	102	303	404	204	101	404	303	202	202	101	0	202	101	303	303	303	103	404	404	101	204	103	101	404	303	202	202	303	303	102	202	204	404	404	204	101	404	101	203	202
16RS_465-61	*	404	103	202	101	404	202	303	204	101	303	404	202	303	204	303	202	202	101	303	202	202	303	303	303	101	404	404	101	202	303	202	204	303	202	202	303	303	102	204	204	404	202	204	101	404	303	203	202
16RS_465-62	*	404	103	203	101	303	202	303	204	101	303	404	202	103	202	303	202	202	103	101	203	102	303	303	303	303	303	404	101	202	103	202	204	303	202	204	303	303	102	404	204	404	404	204	101	404	101	0	204
16RS_465-64	*	404	103	203	102	404	202	303	204	202	303	404	204	103	204	303	202	202	101	103	202	102	303	303	303	103	303	404	103	202	103	102	204	303	202	404	303	303	102	204	204	204	404	204	101	404	101	203	204
16RS_465-65	*	303	303	202	101	404	204	303	204	101	303	204	202	103	202	304	202	202	101	101	203	101	303	303	303	101	303	404	103	204	303	202	404	203	202	204	303	103	102	204	204	404	404	204	101	404	101	303	202
16RS_465-66	*	404	103	202	101	303	204	303	204	101	303	204	202	101	202	304	202	404	103	103	202	102	303	303	303	101	303	404	103	404	103	202	404	203	202	202	303	103	102	204	204	404	204	204	101	404	101	203	202
16RS_465-67	*	404	101	303	202	404	204	303	204	101	303	404	404	103	202	303	202	202	103	103	203	102	101	303	303	101	304	404	103	202	303	202	202	203	202	202	303	303	102	404	204	404	404	204	101	404	103	203	202
16RS_465-68	*	404	103	202	101	303	204	303	204	101	303	404	202	103	202	303	202	404	101	303	202	101	103	303	303	101	303	404	101	404	103	202	404	202	202	404	303	303	102	202	204	404	204	204	101	204	303	303	202
16RS_465-69	*	404	103	202	102	404	202	303	204	0	303	204	204	101	202	303	202	202	103	101	203	101	103	303	103	103	303	404	103	202	303	202	404	303	202	204	303	303	102	204	204	404	404	204	101	404	103	303	204
16RS_465-70	*	404	303	203	102	404	404	303	404	101	303	404	204	103	202	303	202	202	103	103	202	102	101	303	303	303	304	404	103	204	303	202	404	303	202	204	303	303	102	202	204	404	404	204	101	404	101	303	202
16RS_465-71	*	404	303	203	102	304	202	303	204	101	303	204	204	303	204	304	202	204	101	101	202	101	303	303	303	101	303	404	103	202	101	101	204	303	202	204	303	303	102	202	404	404	404	204	101	404	101	203	204
18LV_6135	*	404	303	203	101	404	202	303	204	101	303	404	204	101	202	303	202	202	101	101	203	101	303	303	303	101	303	404	101	202	103	202	204	303	202	404	303	103	102	204	202	404	204	204	103	404	103	303	202
18LV_6136	*	404	303	203	101	404	202	303	204	101	303	204	404	303	202	303	202	204	101	0	202	102	303	303	303	103	304	404	103	202	103	202	404	303	202	404	303	303	102	404	202	404	404	204	103	204	103	203	204
18LV_6137	*	404	303	202	101	303	204	303	204	102	303	404	202	101	202	303	102	202	101	303	202	102	303	303	303	303	304	404	101	404	103	102	202	203	202	204	303	303	102	202	202	404	404	204	103	404	103	203	202
18LV_6138	*	404	103	203	101	404	202	303	204	102	303	404	204	103	202	304	202	202	101	101	303	101	303	303	303	103	303	404	101	202	303	101	204	303	202	204	303	103	102	204	204	404	204	204	103	404	101	303	204
18LV_6139	*	404	303	203	101	304	202	303	204	101	303	404	204	101	202	303	202	202	101	101	203	202	303	303	303	101	304	404	103	202	303	202	204	303	202	404	303	303	102	202	202	404	204	204	103	404	103	303	202
18LV_6140	*	404	303	202	101	404	202	303	204	101	303	404	204	101	204	303	202	404	101	101	203	202	303	303	303	101	303	404	103	204	103	202	404	303	202	204	303	303	101	404	202	404	404	204	103	404	103	203	202
18LV_6141	*	404	103	303	101	404	202	303	204	101	303	404	404	303	202	303	202	202	303	101	203	101	303	303	103	103	303	404	103	204	303	102	404	303	202	202	303	303	102	204	202	404	204	204	103	404	103	303	202
18LV_6142	*	404	303	202	101	404	202	303	204	101	303	404	204	303	202	303	202	202	101	101	202	102	303	303	303	303	303	404	101	202	303	202	204	203	202	404	303	303	102	404	202	404	202	204	103	404	103	303	404
18LV_6143	*	404	303	202	101	304	202	303	204	102	303	204	204	303	202	303	202	202	101	103	203	102	103	303	303	101	304	404	303	202	103	101	404	303	202	204	303	103	102	204	202	404	404	204	0	404	103	203	202
18LV_6145	*	404	303	202	101	404	204	303	204	102	303	204	204	101	202	303	102	204	101	101	202	101	103	303	303	101	303	404	101	202	303	202	204	303	202	204	303	103	102	204	202	404	204	204	103	404	103	303	204
18LV_6146	*	404	303	203	101	404	202	303	204	101	303	204	404	103	202	303	202	204	101	101	203	101	103	303	303	303	303	404	103	202	101	202	204	203	202	204	303	303	102	202	202	404	404	204	103	404	101	203	204
18LV_6147	*	404	303	202	101	404	202	303	204	102	303	404	204	303	202	303	102	202	101	101	202	102	303	303	303	103	303	404	101	404	103	202	404	303	202	404	303	303	102	202	202	404	204	204	103	404	103	203	202
18LV_6148	*	404	303	202	101	404	202	303	204	101	303	204	204	101	202	304	102	202	101	0	202	101	303	303	303	303	404	404	101	404	303	102	404	303	202	204	303	303	102	204	202	404	404	204	103	404	101	303	202
18LV_6149	*	404	303	203	101	303	204	303	204	101	303	204	202	303	202	304	202	202	103	0	202	202	303	303	303	303	303	404	103	204	101	102	404	203	202	404	303	303	102	204	202	404	204	204	103	404	103	303	404
18LV_6150	*	404	103	203	101	304	202	303	204	0	303	204	202	101	202	303	102	202	103	101	202	101	303	303	303	103	304	404	103	204	101	102	404	202	202	204	303	103	102	202	202	204	404	204	103	404	103	203	202
18LV_6151	*	404	303	202	101	304	202	303	204	0	303	204	204	103	202	303	202	202	101	101	203	101	303	303	303	103	303	404	101	202	103	202	404	303	202	204	303	103	102	202	202	404	204	204	0	204	101	303	202
18LV_6152	*	304	103	202	101	404	202	303	204	202	303	204	404	101	202	303	202	202	101	101	202	102	303	303	303	103	303	404	101	202	103	202	404	303	202	204	303	303	102	204	202	404	404	204	103	404	103	303	202
18LV_6153	*	304	303	203	101	303	202	303	204	101	303	404	202	103	202	303	102	202	101	101	203	102	303	303	303	103	303	404	101	204	103	202	204	303	202	202	303	303	102	404	202	404	404	204	103	404	103	303	204
18LV_6154	*	404	303	203	101	404	202	303	204	101	303	404	204	101	202	303	202	202	101	101	203	102	303	303	303	103	303	404	103	202	101	202	404	203	202	204	303	101	102	204	202	404	404	204	103	404	101	203	204
18LV_6155	*	404	303	202	101	404	202	103	204	101	303	404	202	103	202	303	202	202	103	101	203	102	303	303	303	103	303	404	303	204	303	202	404	303	202	202	303	303	102	202	202	404	404	204	103	404	103	303	204
18LV_6156	*	404	303	202	101	404	202	303	204	202	303	404	0	303	202	304	202	202	101	101	202	101	103	303	303	103	304	404	303	202	303	202	404	303	202	404	303	103	102	204	202	404	404	204	103	404	103	303	202
18LV_6157	*	404	303	203	101	404	202	303	204	101	303	204	202	101	202	303	202	202	303	0	202	101	303	303	303	303	303	404	103	202	303	102	404	303	202	404	303	303	102	204	202	404	404	204	103	204	103	203	202
18LV_6158	*	404	303	202	101	404	202	303	204	101	303	404	404	101	202	303	202	202	101	101	203	101	303	303	303	103	303	404	101	204	303	202	204	303	202	404	303	303	102	404	202	404	404	204	103	404	103	203	204
18LV_6159	*	404	103	203	101	404	202	303	204	101	303	404	204	103	202	303	202	202	103	303	203	101	303	303	303	101	303	404	101	404	103	202	204	203	202	204	303	303	102	204	202	202	404	204	103	204	103	303	202
18LV_6160	*	404	303	202	101	404	204	303	204	101	303	404	204	101	202	303	202	202	103	0	202	101	103	303	303	101	303	404	101	204	103	101	204	203	202	404	303	303	102	202	202	404	404	204	103	404	101	303	202
18LV_6161	*	404	303	203	101	404	202	303	204	102	303	404	204	101	202	303	202	202	101	303	202	101	103	303	303	101	303	404	103	204	303	202	404	303	202	404	303	303	102	404	202	404	404	204	103	404	103	203	202
18LV_6162	*	404	303	203	101	304	202	103	202	101	303	202	204	103	202	404	102	204	101	101	202	101	303	303	103	103	303	404	101	204	103	202	404	202	202	0	303	103	101	202	202	0	404	202	101	404	303	303	204
18LV_6163	*	404	303	203	101	304	204	303	204	101	303	404	204	303	202	303	202	202	101	303	202	101	103	303	303	101	303	404	103	202	103	202	404	303	202	202	303	303	102	204	202	404	404	204	103	404	101	303	204
18LV_6164	*	404	303	203	101	404	202	303	204	101	303	404	204	101	202	303	202	202	101	101	203	102	103	303	303	101	303	404	101	202	303	202	202	303	202	204	303	303	202	204	202	404	404	204	103	404	103	303	202
18LV_6165	*	404	103	202	101	404	202	303	204	101	303	404	204	101	202	304	202	204	101	103	203	101	103	303	303	303	404	404	103	204	103	202	204	202	202	204	303	303	102	202	202	404	204	204	103	404	101	203	202
18LV_6166	*	404	303	202	101	404	202	303	204	101	303	204	202	103	202	304	102	202	101	101	202	101	303	303	303	101	303	404	103	204	303	102	202	303	202	404	303	101	102	202	202	404	404	204	101	404	101	303	204
18LV_6167	*	404	101	203	101	304	204	303	202	101	303	404	204	103	202	304	202	202	101	101	303	101	303	303	303	101	303	404	101	202	303	202	404	303	202	404	303	103	101	204	202	404	404	202	101	404	101	303	202
18LV_6168	*	304	303	303	101	404	204	303	204	101	0	202	202	103	202	303	202	204	101	103	203	102	303	303	303	103	303	404	101	202	103	101	202	303	202	404	303	103	102	204	202	204	404	204	103	204	101	203	202
18LV_6169	*	404	103	202	101	304	404	103	204	101	303	404	202	101	204	304	202	202	101	303	203	102	303	303	103	103	303	404	303	202	303	101	404	203	102	204	303	103	102	404	202	404	204	204	103	404	103	303	204
18LV_6171	*	404	101	202	101	404	202	303	202	101	303	404	204	101	202	303	202	202	0	101	203	202	303	303	303	303	303	404	103	204	303	202	204	303	202	202	303	303	101	202	202	0	204	202	101	404	103	203	204
18LV_6172	*	404	303	202	101	404	202	103	204	0	303	204	204	103	202	303	202	202	303	303	203	101	103	303	303	103	304	404	101	202	103	202	404	303	202	202	303	303	102	202	202	404	404	204	0	404	103	303	204
18LV_6173	*	404	303	202	101	304	202	303	204	101	303	404	202	103	202	303	202	202	103	101	202	101	303	303	303	103	303	404	103	202	103	202	404	303	202	404	303	303	101	404	202	404	404	204	101	404	101	203	202
18LV_6174	*	404	303	203	101	404	202	0	204	202	303	404	404	101	202	303	202	202	101	103	202	101	103	303	303	101	304	404	103	202	103	202	404	303	102	204	303	303	102	202	202	404	204	204	103	404	103	303	202
18LV_6175	*	304	303	203	101	404	202	303	202	101	303	404	204	303	202	303	202	202	101	0	202	101	303	303	303	101	303	404	103	404	103	202	404	202	202	404	303	303	101	202	202	404	404	202	101	0	103	303	202
18LV_6176	*	404	101	202	101	303	202	303	202	0	303	404	202	103	202	304	202	202	0	303	203	102	303	303	303	103	303	404	103	204	303	202	204	303	202	404	303	303	101	202	202	0	404	202	101	404	103	203	202
18LV_6177	*	404	103	303	101	303	204	303	204	101	303	204	202	103	202	303	102	202	101	103	203	101	303	303	303	303	304	404	101	202	103	102	204	203	202	204	303	303	102	404	202	404	202	204	103	204	101	203	202
18LV_6179	*	404	303	203	101	404	202	103	204	101	303	404	202	103	202	303	202	202	103	303	202	101	303	303	303	103	304	404	101	202	303	102	204	303	202	204	303	303	0	204	202	404	404	204	103	204	103	203	204
18LV_6180	*	404	103	203	101	304	202	303	204	102	303	404	204	103	202	303	202	202	101	101	303	101	303	303	303	103	303	404	103	204	101	202	204	303	202	404	303	103	102	204	202	404	204	204	103	404	101	303	202
18LV_6181	*	404	103	202	101	404	202	303	204	101	303	404	202	103	204	303	202	202	101	303	203	202	303	303	303	303	304	404	103	202	103	102	204	202	202	204	303	303	102	404	202	404	404	204	103	404	101	303	202
18LV_6182	*	0	303	203	101	404	202	103	204	101	303	204	404	101	202	303	202	202	303	101	203	202	103	303	303	101	303	404	101	202	303	202	204	303	202	404	303	303	102	204	202	404	404	204	103	204	103	203	202
18LV_6183	*	0	303	203	101	404	202	303	204	101	303	404	204	101	202	303	202	202	103	103	203	102	103	303	303	103	304	404	101	404	103	202	204	303	202	404	103	303	102	204	202	404	404	204	103	404	103	203	202
18LV_6184	*	404	303	202	101	404	204	303	204	101	303	404	204	103	202	303	202	204	103	101	203	101	103	303	303	101	304	404	303	202	303	202	202	303	202	202	303	303	102	204	202	404	204	404	103	404	101	303	404
18LV_6185	*	404	303	202	101	404	202	303	204	101	303	202	204	103	202	303	202	202	101	303	202	102	303	303	303	101	303	404	103	204	303	202	404	303	202	204	303	303	102	202	404	404	404	204	103	404	103	303	202
18LV_6186	*	404	101	202	101	404	202	303	202	202	303	202	202	303	202	303	202	202	0	103	202	101	103	303	303	101	303	404	101	204	103	202	404	303	202	204	303	103	101	202	202	0	404	202	101	404	303	303	202
18LV_6187	*	404	303	202	101	304	202	303	204	102	303	404	204	101	202	303	202	202	101	0	203	102	103	303	303	103	304	404	303	204	303	101	404	303	202	204	303	303	102	404	202	404	404	204	103	404	103	203	202
18LV_6188	*	404	303	303	101	404	204	303	204	101	303	204	204	101	202	303	202	204	103	101	202	101	303	303	303	101	303	404	101	204	103	202	404	203	202	404	303	303	102	404	202	204	204	204	103	404	103	303	202
18LV_6189	*	0	103	303	101	404	202	303	204	101	303	404	404	103	202	303	202	204	103	101	203	101	103	303	303	103	303	404	303	202	303	202	204	303	202	202	303	303	102	202	202	404	404	204	103	404	103	303	202
18LV_6190	*	404	103	203	101	304	202	303	204	101	303	204	202	103	202	303	102	202	101	103	203	102	303	303	303	101	304	404	103	202	303	202	404	203	202	204	303	303	102	204	202	404	204	204	103	404	103	303	204
18LV_6192	*	404	303	202	101	404	204	303	204	202	303	204	202	101	204	303	202	202	101	101	203	101	103	303	303	303	303	404	103	202	103	202	404	303	202	204	303	103	102	202	202	404	404	204	103	404	101	203	204
18LV_6193	*	404	303	202	101	303	202	303	202	101	303	0	202	101	202	303	202	202	101	0	303	202	103	303	103	103	303	404	101	202	103	102	404	303	202	204	303	303	101	202	202	0	204	202	101	404	103	303	202
18LV_6195	*	404	303	203	101	404	202	303	204	101	303	404	202	103	202	303	102	202	101	101	203	102	303	303	303	103	303	404	303	404	103	101	202	203	202	204	303	303	102	202	204	404	404	204	103	404	101	303	202
18LV_6196	*	404	303	202	101	304	202	303	204	101	303	204	404	101	202	304	202	202	101	303	202	102	303	303	303	103	404	404	101	202	303	202	204	303	202	204	303	303	102	404	202	404	204	204	103	404	101	203	404
18LV_6197	*	404	303	202	101	304	204	101	204	101	303	404	204	101	202	303	202	202	103	103	202	101	303	303	303	103	303	404	101	202	303	202	404	303	202	204	303	303	102	202	202	404	404	204	103	404	103	303	202
18LV_6199	*	404	303	202	101	404	202	303	204	0	303	204	204	101	202	303	202	202	101	101	203	202	303	303	303	103	304	404	101	202	101	102	202	303	202	404	303	303	102	204	202	404	204	204	103	204	101	303	202
18LV_6200	*	404	303	203	101	303	202	303	204	101	303	404	404	101	202	303	202	202	101	303	203	102	303	303	303	303	303	404	103	204	103	202	404	303	202	204	303	103	102	202	202	404	204	204	103	204	101	303	202
18LV_6201	*	404	303	203	101	404	202	303	404	101	303	404	202	101	202	303	202	202	103	103	303	101	303	303	303	103	303	404	101	404	103	102	404	203	202	204	303	303	102	202	202	204	204	204	103	404	101	203	202
18LV_6202	*	404	303	202	101	303	202	103	204	101	303	404	204	103	202	303	202	202	101	103	202	101	103	303	303	101	303	404	101	204	303	101	204	303	202	404	303	303	102	204	202	404	204	204	103	404	103	203	204
18LV_6203	*	404	303	203	101	404	202	303	204	101	303	204	204	101	202	303	202	204	101	303	202	101	303	303	303	103	304	404	103	202	303	202	404	203	202	404	303	303	0	202	202	404	404	0	0	404	101	303	202
18LV_6204	*	404	303	202	101	404	202	303	204	102	303	204	202	101	202	303	102	204	103	303	202	101	103	303	103	103	303	404	101	404	303	102	404	303	202	404	303	101	0	202	202	404	404	204	101	404	103	303	202
18LV_6205	*	404	303	202	101	404	202	303	204	101	303	204	204	103	204	303	202	404	101	103	202	102	303	303	303	101	303	404	103	202	303	202	404	303	202	204	303	303	102	204	202	204	404	204	103	404	101	303	204
18LV_6207	*	404	303	202	101	404	202	103	204	102	303	404	202	101	202	303	202	202	101	101	203	102	103	303	303	103	303	404	103	202	303	202	202	303	202	204	303	303	202	204	202	404	404	204	103	404	103	303	204
18LV_6208	*	404	303	203	101	404	204	303	204	101	303	404	204	303	202	303	202	202	101	101	203	102	101	303	303	101	303	404	103	204	303	202	404	203	202	204	303	303	102	202	202	404	404	204	103	404	101	203	202
18LV_6209	*	404	303	202	101	404	202	103	204	101	303	404	404	101	202	303	202	204	101	103	203	102	303	303	303	103	303	404	303	404	303	102	404	303	202	204	303	303	102	404	202	404	404	204	103	404	103	203	202
18LV_6210	*	404	303	203	101	304	202	303	204	102	303	404	404	103	202	304	202	202	303	101	202	101	103	303	303	103	303	404	101	202	103	202	204	303	202	404	303	303	102	204	202	404	404	204	103	204	101	203	202
18LV_6211	*	304	303	202	101	304	204	303	204	101	303	204	204	101	202	303	202	202	103	103	203	101	303	303	303	303	303	404	101	204	303	101	204	203	202	404	303	303	102	404	202	202	404	204	103	404	103	303	202
18LV_6212	*	404	303	202	101	404	202	303	204	101	303	404	202	303	202	303	102	202	101	101	203	202	303	303	303	101	303	404	103	202	103	101	404	303	202	204	103	303	102	202	202	404	404	204	103	404	103	203	202
18LV_6213	*	404	303	203	101	404	202	103	204	202	303	204	204	101	202	303	202	202	101	101	203	101	303	303	303	101	303	404	101	202	303	102	204	303	202	404	303	303	101	202	202	404	404	204	0	404	101	203	202
18LV_6214	*	404	303	202	101	304	202	303	204	101	303	204	202	103	202	303	202	204	101	101	202	101	103	303	303	103	303	404	103	202	103	202	202	303	202	204	303	103	102	204	202	404	404	204	103	204	103	303	204
18LV_6215	*	404	303	203	101	404	202	303	204	102	303	204	204	101	202	303	202	202	101	303	203	102	303	303	303	101	304	404	103	204	303	202	404	303	202	204	303	303	102	202	404	404	204	204	103	404	103	203	204
18LV_6216	*	404	303	202	101	404	202	303	204	101	303	404	204	101	202	303	202	202	101	101	202	101	103	303	303	103	303	404	101	202	303	202	204	203	202	204	303	303	102	204	202	404	404	204	103	404	103	203	202
18LV_6217	*	404	303	202	101	404	204	103	204	102	303	202	202	103	202	303	202	202	101	101	202	101	103	303	303	103	303	404	103	202	303	102	404	303	202	404	303	303	102	404	202	404	404	204	103	204	101	203	204
18LV_6218	*	404	303	203	101	304	204	303	204	101	303	404	204	103	202	303	202	202	101	303	203	101	303	303	303	101	303	404	101	202	103	202	204	303	202	404	303	303	202	204	202	404	204	204	103	404	103	303	404
18LV_6219	*	404	303	202	101	404	202	303	204	101	303	204	202	101	202	303	202	204	101	101	203	102	103	303	103	103	303	404	103	204	303	202	204	303	202	204	303	303	102	204	202	404	404	204	103	404	101	303	202
18LV_6220	*	404	303	203	101	303	202	303	204	101	303	404	202	303	202	304	202	202	101	303	202	102	103	303	303	303	303	404	103	202	103	102	204	303	202	404	303	103	102	202	202	404	404	204	103	404	103	303	204
18LV_6221	*	404	303	303	101	404	202	303	404	101	303	202	204	103	204	303	202	202	103	101	202	101	103	303	303	101	303	404	101	204	303	202	404	203	202	204	303	103	102	204	202	404	404	204	103	404	103	303	202
18LV_6222	*	404	303	202	101	304	202	303	204	101	303	404	202	303	204	303	202	202	101	103	202	202	103	303	303	101	303	404	103	202	103	102	204	203	202	404	303	303	102	202	202	404	404	204	103	404	101	203	204
18LV_6223	*	404	303	202	101	304	202	303	404	101	303	404	404	103	202	304	202	202	101	101	202	101	103	303	303	103	303	404	103	202	103	202	202	303	202	204	303	303	102	404	202	204	404	404	103	404	103	303	202
18LV_6224	*	404	303	202	101	304	202	303	204	101	303	204	202	103	202	303	202	202	101	101	203	101	303	303	303	103	303	404	101	202	303	202	204	303	202	404	303	303	102	202	202	404	204	204	103	404	101	303	204
18LV_6225	*	404	103	202	101	404	202	303	204	101	303	404	204	103	202	303	202	204	101	103	202	101	303	303	303	101	404	404	103	202	303	202	204	203	202	204	303	303	102	404	202	404	204	204	103	404	101	303	202
18LV_6226	*	404	303	202	101	404	202	303	204	202	303	202	202	101	202	303	202	202	101	303	202	202	303	303	103	103	303	404	101	202	103	202	404	303	202	204	303	101	102	204	202	404	404	404	103	404	103	303	204
18LV_6227	*	404	103	202	101	404	202	303	204	102	303	404	202	103	202	303	202	204	101	103	202	101	303	303	303	101	304	404	103	202	103	102	204	303	202	204	303	303	102	202	202	404	404	204	103	404	101	303	202
18LV_6228	*	404	303	203	101	404	202	303	204	102	303	204	404	103	202	303	202	202	101	103	202	101	103	303	303	101	303	404	103	202	103	202	204	303	202	404	303	303	102	202	202	204	404	204	103	404	103	303	202
18LV_6229	*	404	303	203	101	404	202	303	204	0	303	404	204	103	202	303	202	202	103	0	203	101	303	303	303	103	303	404	101	202	303	102	204	303	202	202	103	303	102	404	202	404	204	204	103	404	103	303	202
18LV_6230	*	404	303	203	101	404	202	303	204	101	303	204	204	101	202	303	202	202	103	303	202	202	303	303	303	101	304	404	103	204	303	202	202	303	202	204	303	103	102	202	202	404	404	404	0	404	103	303	204
18RS_6231	*	404	303	203	101	404	202	303	404	101	303	202	204	101	204	303	202	202	101	101	203	102	103	303	303	101	303	404	101	202	303	202	204	303	202	202	303	303	102	204	204	404	404	202	103	404	103	303	204
18RS_6232	*	404	101	203	101	404	202	303	404	101	303	404	204	101	204	303	202	202	101	103	203	102	103	303	303	303	303	404	103	202	303	202	204	203	202	202	303	303	102	202	204	404	204	202	103	404	103	303	404
18RS_6233	*	404	303	202	101	304	202	303	204	101	303	404	202	103	404	303	202	202	101	101	202	102	303	303	303	101	303	404	101	202	103	102	404	303	102	404	303	103	101	0	202	0	204	202	101	404	303	303	202
18RS_6235	*	404	103	202	101	404	204	303	404	101	303	404	204	101	204	303	102	202	101	103	203	101	101	303	303	101	303	404	101	204	103	202	204	303	202	204	303	303	102	404	204	404	204	202	103	404	101	303	202
18RS_6236	*	404	303	303	101	404	202	303	204	101	303	404	204	101	0	303	102	202	0	101	203	102	303	303	303	101	303	404	103	202	103	202	404	203	202	204	303	303	101	202	202	0	204	202	101	404	101	303	204
18RS_6237	*	404	103	202	101	304	204	303	404	102	303	404	202	101	204	303	102	202	103	103	202	101	303	303	303	103	304	404	103	202	303	202	404	303	102	204	303	103	102	202	204	404	404	202	103	404	103	303	202
18RS_6239	*	404	303	203	101	304	202	303	404	102	303	404	204	103	204	303	202	202	101	101	203	101	103	303	303	103	303	404	103	202	103	202	404	203	202	404	303	303	102	204	204	404	404	202	103	404	303	203	202
18RS_6240	*	404	303	202	101	304	202	303	404	101	303	202	202	303	204	304	102	204	101	103	203	102	303	303	303	103	303	404	101	202	103	102	204	203	202	202	303	303	102	202	204	404	204	202	103	404	103	203	202
18RS_6242	*	404	303	203	101	404	202	303	404	102	303	202	202	103	204	303	202	202	101	101	303	101	101	303	303	101	303	404	103	202	303	202	404	303	202	204	303	303	102	202	204	404	404	202	103	404	303	303	202
18RS_6243	*	404	101	203	101	404	204	303	204	101	303	404	202	103	204	303	102	404	103	303	202	101	303	303	303	103	303	404	101	204	303	202	204	303	202	202	303	303	102	204	204	404	404	202	103	404	103	303	202
18RS_6244	*	404	103	202	101	404	202	303	204	0	303	202	204	103	204	303	202	202	101	101	202	101	303	303	303	101	303	404	103	202	103	202	404	303	202	204	303	303	202	202	204	404	204	202	0	404	303	203	202
18RS_6247	*	404	103	202	101	404	202	303	404	101	303	404	202	101	204	303	202	204	101	101	203	101	101	303	303	103	303	404	101	202	101	102	404	203	202	204	303	303	102	404	204	404	404	202	103	404	103	203	202
18RS_6248	*	404	103	202	101	304	202	303	204	101	303	404	204	101	204	303	202	202	101	101	202	102	303	303	303	103	303	404	103	202	103	202	204	303	202	202	303	303	0	202	204	404	204	202	103	404	101	303	204
18RS_6249	*	404	103	203	101	404	202	303	204	101	303	202	204	103	204	303	102	204	101	101	203	202	303	303	303	101	304	404	303	202	303	202	404	303	202	404	303	303	101	202	204	404	404	202	103	404	103	303	204
18RS_6250	*	304	103	203	101	304	202	303	404	101	303	404	202	101	204	303	202	202	101	101	203	202	303	303	303	303	303	404	101	202	303	102	404	303	202	204	303	303	102	404	204	404	204	202	103	404	103	303	202
18RS_6251	*	0	103	203	101	404	202	303	404	102	303	202	204	101	204	304	202	202	101	101	202	102	303	303	303	103	303	404	101	202	103	202	404	203	202	204	303	303	102	202	204	0	404	202	103	404	303	203	202
18RS_6252	*	404	303	203	101	304	202	303	404	102	303	404	404	101	204	304	202	202	103	101	203	202	303	303	303	103	303	404	103	404	303	202	404	303	202	404	303	303	102	202	204	404	204	202	103	404	103	303	202
18RS_6253	*	404	101	202	101	404	202	303	404	101	303	202	204	103	204	303	102	202	101	103	203	101	303	303	303	303	303	404	103	202	303	202	404	303	202	204	303	303	102	404	204	404	404	202	103	404	101	203	204
18RS_6254	*	404	103	203	101	404	202	303	204	102	303	404	404	103	204	303	202	202	103	101	202	101	303	303	303	101	303	404	101	202	303	202	204	203	202	202	303	303	101	204	202	202	204	202	101	202	101	203	202
18RS_6255	*	404	103	203	101	304	202	303	404	101	303	202	204	101	204	303	202	204	103	103	203	102	103	303	303	103	304	404	103	204	103	202	404	303	202	204	303	303	102	202	204	204	204	202	103	404	103	203	202
18RS_6256	*	0	103	202	101	404	204	303	404	101	303	202	404	103	404	303	202	202	101	101	202	101	303	303	103	101	303	404	101	204	303	202	404	203	202	204	303	303	102	202	204	404	404	202	103	404	101	303	202
18RS_6257	*	404	303	203	101	304	204	303	404	101	303	202	204	101	204	304	202	202	103	0	202	102	103	303	303	103	303	404	101	202	103	202	204	303	202	204	303	103	102	202	204	404	404	202	103	204	103	203	204
18RS_6259	*	404	103	202	101	303	202	103	404	101	303	404	204	101	204	303	202	202	103	0	203	102	303	303	303	103	303	404	101	202	303	202	204	303	202	202	303	103	102	202	204	404	404	202	103	404	303	203	404
18RS_6260	*	404	303	202	101	304	202	303	404	0	303	202	404	103	204	303	202	202	101	101	203	101	303	303	303	101	303	404	103	202	103	202	204	203	202	202	303	103	102	202	204	404	404	202	103	404	103	203	202
18RS_6261	*	404	101	202	101	404	204	103	404	101	303	202	204	103	204	304	102	202	101	101	303	202	303	303	103	103	303	404	103	202	103	0	404	303	202	404	303	303	102	204	204	404	404	202	103	404	103	203	202
18RS_6262	*	404	103	303	101	404	202	303	404	202	303	202	202	103	204	303	202	204	101	303	203	102	103	303	303	101	303	204	101	204	303	202	204	203	202	204	303	303	102	204	204	404	404	202	103	404	103	203	204
18RS_6263	*	304	303	203	101	404	202	103	204	101	0	202	204	103	0	303	202	202	0	101	203	101	303	303	303	103	303	404	101	0	103	202	202	203	202	404	303	303	101	202	202	404	404	202	101	404	103	303	202
18RS_6264	*	404	303	203	101	404	202	303	204	101	303	202	404	101	204	303	202	202	0	0	203	101	303	303	303	103	303	404	101	204	303	202	404	303	202	404	303	103	101	202	202	0	204	202	101	202	101	303	204
18RS_6265	*	404	101	202	101	404	404	303	404	202	303	202	204	103	204	304	202	202	101	101	203	101	303	303	303	303	303	404	103	202	101	202	202	303	202	404	303	103	102	404	204	404	404	202	103	404	103	303	202
18RS_6266	*	404	303	202	101	404	202	303	204	101	303	202	204	101	404	303	202	202	101	103	303	101	303	303	303	103	303	404	103	202	303	202	204	303	202	204	303	303	0	202	0	404	404	202	103	404	303	203	202
18RS_6267	*	404	103	203	101	404	202	303	204	101	303	404	202	103	204	303	202	204	101	103	202	101	103	303	303	101	303	404	103	202	303	202	204	203	202	204	303	303	102	202	0	404	204	202	103	404	103	303	202
18RS_6269	*	404	103	303	101	304	204	303	404	102	303	404	202	103	204	303	202	204	103	101	203	101	303	303	303	103	303	404	101	202	303	202	404	203	202	204	303	303	102	202	204	404	404	202	103	404	101	203	404
18RS_6270	*	404	103	202	101	404	202	303	404	102	303	404	404	103	204	303	202	204	103	0	202	101	303	303	303	101	303	404	103	202	303	202	204	303	202	204	303	303	102	404	204	404	404	202	103	404	101	203	202
18RS_6271	*	404	101	203	101	304	202	101	404	101	303	202	204	103	204	303	202	204	101	101	202	202	303	303	303	101	303	404	101	202	103	202	204	303	202	404	303	303	102	404	204	404	404	202	103	404	303	303	204
18RS_6273	*	404	103	303	101	404	204	303	404	101	303	404	202	103	204	303	202	202	101	101	203	102	303	303	103	101	303	404	303	202	303	202	404	303	202	204	303	103	102	204	204	204	404	202	103	404	303	203	204
18RS_6274	*	404	103	203	101	404	202	303	404	101	303	202	202	101	204	303	102	202	101	101	202	102	103	303	303	303	303	204	101	202	103	202	404	303	102	404	303	103	102	404	204	404	202	202	103	404	103	203	202
18RS_6275	*	404	101	203	101	304	202	303	404	101	303	404	204	101	204	303	202	204	101	303	203	101	303	303	303	103	303	404	103	202	303	102	204	203	202	202	303	303	102	202	204	404	404	202	103	404	303	203	204
18RS_6276	*	404	103	203	101	304	202	303	404	101	303	202	404	103	204	303	202	202	101	101	203	101	303	303	303	303	303	404	101	204	103	202	404	303	202	204	303	303	102	202	204	204	204	202	103	202	103	203	202
18RS_6277	*	404	103	203	101	304	202	303	404	102	303	404	204	103	204	303	102	202	101	103	203	102	101	303	103	103	303	404	103	202	303	202	404	303	202	404	303	303	102	404	204	404	204	202	103	404	101	203	202
18RS_6278	*	404	101	202	101	304	202	303	404	101	303	404	204	103	204	303	202	202	101	101	202	101	303	303	303	101	303	404	101	404	303	0	404	203	202	204	303	303	102	202	204	404	404	202	103	404	303	203	202
18RS_6279	*	404	101	202	101	304	202	303	404	101	303	202	204	101	204	303	102	202	103	0	202	101	103	303	303	103	303	404	103	202	303	202	404	303	202	204	303	303	102	204	204	202	202	202	103	404	101	203	202
18RS_6280	*	404	101	203	101	304	202	303	404	101	303	404	404	101	204	303	202	204	101	101	203	102	303	303	303	103	303	404	101	204	303	202	204	303	202	204	303	303	102	202	204	404	204	202	103	404	103	203	202
18RS_6281	*	404	103	202	101	304	202	303	404	202	303	202	202	103	204	303	202	202	101	101	202	101	303	303	303	103	304	404	303	202	303	202	204	303	202	204	303	303	102	204	204	404	404	202	103	404	101	303	202
18RS_6282	*	404	303	202	101	404	202	303	204	101	303	404	202	103	204	303	102	404	103	101	203	202	103	303	303	303	303	404	103	404	303	202	404	203	102	204	303	303	102	204	204	404	204	202	103	404	303	303	202
18RS_6283	*	404	103	203	101	304	202	303	404	101	303	404	404	101	204	303	102	204	101	101	203	101	303	303	303	103	303	404	103	404	303	102	204	303	202	404	303	303	102	404	204	404	404	202	103	404	103	303	202
18RS_6284	*	404	303	202	101	304	204	303	404	101	303	404	202	101	204	303	202	202	101	103	202	101	103	303	303	103	303	404	101	202	101	202	204	303	102	404	303	103	102	202	404	404	404	202	103	404	101	203	202
18RS_6285	*	404	303	202	101	304	204	303	404	101	0	404	204	103	204	303	202	202	101	101	203	102	303	303	303	101	304	404	101	202	303	102	204	203	202	202	303	103	102	404	204	404	204	202	103	404	101	303	204
18RS_6286	*	0	101	202	101	304	202	303	204	202	303	202	404	103	204	303	202	202	101	101	203	102	303	303	303	101	303	404	101	202	103	202	404	303	202	204	303	303	101	204	202	404	404	202	0	404	103	303	202
18RS_6287	*	304	101	203	101	404	202	303	404	101	303	404	204	103	204	303	202	202	101	303	202	101	303	303	303	101	303	404	103	204	103	202	404	202	202	202	303	303	102	204	204	404	204	202	103	404	101	303	204
18RS_6288	*	404	103	202	101	304	202	303	404	101	303	404	404	101	204	303	202	202	103	101	202	102	103	303	303	101	304	404	101	404	303	202	204	303	202	404	303	303	102	404	204	404	404	202	103	404	103	303	204
18RS_6289	*	404	103	203	101	404	202	303	404	101	303	404	404	103	204	303	202	202	101	0	203	101	103	303	303	101	303	404	103	204	103	202	404	303	202	202	303	303	102	204	404	404	202	202	103	404	103	303	202
18RS_6290	*	404	303	303	101	304	204	303	204	101	303	202	404	103	204	303	202	202	103	303	202	101	303	303	303	101	303	404	101	204	303	102	404	303	202	204	303	103	102	404	204	404	204	202	103	404	101	203	404
18RS_6291	*	404	103	303	101	303	202	303	404	101	303	404	204	103	204	303	202	202	101	101	203	101	303	303	303	103	303	404	101	202	103	102	204	303	202	202	303	303	102	404	204	204	404	202	103	404	303	303	404
18RS_6292	*	404	101	202	101	303	202	303	404	102	303	204	204	103	204	303	202	202	103	103	202	101	303	303	303	103	303	404	103	202	103	202	404	303	202	404	303	303	102	202	204	404	404	202	103	404	103	203	202
18RS_6293	*	404	101	202	101	304	202	103	404	101	303	202	404	303	204	303	202	202	103	303	303	102	303	303	303	101	303	404	103	202	103	202	204	303	202	404	303	303	0	204	202	404	204	202	0	202	303	203	202
18RS_6295	*	404	103	202	101	304	202	303	404	202	303	202	204	101	204	303	102	202	101	101	202	101	303	303	303	103	304	404	103	202	101	202	404	303	202	404	303	303	102	202	204	404	204	202	103	404	303	203	204
18RS_6298	*	404	303	202	101	404	202	303	404	101	303	202	404	103	204	303	202	204	103	101	202	101	103	303	303	303	303	404	103	202	303	202	404	303	202	404	303	303	102	204	204	404	404	202	103	404	101	203	204
18RS_6299	*	404	103	203	101	404	204	303	404	101	0	404	202	101	204	303	202	202	101	303	203	102	303	303	303	101	303	404	101	202	303	101	204	303	202	0	303	303	102	202	204	404	404	202	103	202	101	203	202
18RS_6300	*	404	101	303	101	304	202	303	404	101	303	202	202	101	204	304	202	202	103	101	203	101	303	303	303	103	304	404	101	202	103	202	404	303	202	202	303	103	102	204	204	404	404	202	103	404	103	303	202
18RS_6301	*	404	303	202	101	304	202	303	404	101	303	404	202	101	204	303	102	202	101	303	202	101	303	303	303	101	303	404	101	204	103	202	404	303	202	404	303	303	102	202	204	404	404	202	103	404	101	303	202
18RS_6303	*	404	303	202	101	304	202	303	404	102	303	202	204	103	204	303	202	204	101	0	303	101	303	303	303	103	303	404	303	202	103	202	404	303	202	202	303	303	102	202	204	404	204	202	103	404	103	303	202
18RS_6304	*	404	103	203	101	304	202	303	404	202	303	202	202	103	204	304	102	202	101	303	303	101	303	303	303	103	304	404	101	202	303	202	404	303	202	404	303	303	102	202	204	404	404	202	103	404	103	203	202
18RS_6307	*	404	101	203	101	304	202	303	404	102	303	202	204	101	204	303	202	202	303	103	303	101	303	303	103	101	303	404	101	202	103	202	204	203	202	404	303	103	102	204	204	404	404	202	103	202	303	203	204
18RS_6308	*	404	103	203	101	404	202	303	404	101	303	204	404	103	204	303	202	202	303	303	203	102	103	303	303	101	303	404	101	404	103	102	404	303	202	404	0	303	202	202	204	404	404	202	103	404	303	203	202
18RS_6309	*	404	103	202	101	404	202	303	404	101	303	404	204	103	204	303	202	204	103	101	203	101	303	303	303	103	303	404	101	204	103	202	404	303	202	404	303	303	102	202	204	404	404	202	103	404	103	303	204
18RS_6310	*	404	103	202	101	404	202	101	404	202	303	202	204	101	204	303	202	202	101	303	202	101	303	303	303	103	303	404	103	202	303	202	204	303	202	204	303	303	102	204	204	404	204	202	103	202	101	303	202
18RS_6311	*	404	303	203	101	404	204	303	204	202	303	202	404	101	204	303	102	202	101	0	303	102	303	303	303	101	404	404	103	202	101	101	404	303	202	404	303	303	101	204	202	404	404	202	101	404	103	303	202
18RS_6312	*	404	103	202	101	404	202	303	0	101	303	404	204	101	204	303	202	202	101	101	303	102	103	303	303	303	304	404	101	204	303	202	204	303	202	204	303	303	102	404	204	404	404	202	103	404	103	203	204
18RS_6313	*	404	101	202	101	404	204	303	404	102	303	404	202	103	204	303	102	202	101	103	202	102	303	303	303	101	303	404	101	204	103	202	404	203	202	204	303	103	102	204	204	404	404	202	103	404	103	303	204
18RS_6314	*	404	303	203	101	304	204	303	204	101	303	404	204	103	204	303	102	202	101	101	303	101	101	303	303	101	303	404	103	0	103	202	204	203	202	204	303	303	101	202	0	404	204	202	103	202	101	303	202
18RS_6315	*	404	303	202	101	304	202	303	404	101	303	202	202	103	204	304	202	202	103	103	203	102	103	303	303	103	303	404	101	404	101	202	404	203	202	204	303	303	102	204	204	404	404	202	103	404	303	203	404
18RS_6316	*	404	101	303	101	404	202	103	404	102	303	202	204	303	204	303	202	202	103	101	202	101	303	303	303	103	303	404	101	202	103	202	404	203	202	404	303	303	102	204	204	404	404	202	103	404	303	203	202
18RS_6317	*	404	103	202	101	404	202	103	404	102	303	404	404	101	204	303	202	204	103	303	202	101	303	303	303	101	303	404	101	404	103	101	204	303	202	404	303	303	102	204	204	204	404	202	103	404	101	203	202
18RS_6318	*	404	303	202	101	404	202	303	204	101	303	404	202	101	204	303	202	202	101	101	202	101	103	303	303	303	303	404	103	202	103	202	204	303	202	202	303	303	102	202	204	404	404	202	103	404	101	303	202
18RS_6319	*	404	103	202	101	303	204	303	204	101	303	202	404	101	204	303	202	202	303	103	202	101	303	303	303	103	303	404	103	404	303	202	404	303	102	204	303	101	0	204	204	404	404	202	103	404	103	303	204
18RS_6322	*	404	103	203	101	304	202	303	204	101	303	202	204	101	204	303	102	202	101	101	203	101	103	303	303	101	404	404	101	404	303	202	404	303	202	204	303	303	0	202	202	404	404	202	0	404	101	203	202
18RS_6323	*	404	103	202	101	404	202	303	404	202	303	202	204	101	204	303	202	202	101	103	203	101	303	303	303	103	304	404	101	404	103	202	204	303	202	204	303	303	102	404	204	404	204	202	103	404	101	203	202
18RS_6324	*	404	103	202	101	303	202	103	204	101	303	404	204	103	204	303	202	202	101	101	203	101	303	303	103	101	404	404	103	202	103	202	404	303	202	404	0	303	101	204	202	202	204	202	101	404	303	203	202
18RS_6325	*	404	103	203	101	404	204	303	404	101	303	202	204	103	204	303	202	202	101	103	202	101	303	203	103	103	303	404	303	204	101	202	404	303	202	202	303	303	102	404	204	404	404	202	103	202	101	303	202
18RS_6326	*	404	103	202	101	404	202	303	404	102	303	404	204	101	204	303	202	204	103	101	203	102	303	303	303	101	304	404	303	204	101	202	204	203	202	404	303	303	102	204	0	404	404	202	103	404	103	203	202
[truncated: 37 more columns]

## Sheet: Tables S5a &S5b; Obs. Exp Het.
Table S5a. Mean observed and expected heterozygosities and standard deviations for 16 putative populations collected from Landisville and Rock Springs, Pennsylvania.
Pop #	Population	Obs. Het	Stdev	Exp. Het	Stdev
1	02RS-Aug12	0.33026	0.23989	0.33621	0.16066
2	02RS-Aug20	0.33759	0.24966	0.35058	0.15842
3	02RS-Aug27	0.339	0.22483	0.34744	0.14895
4	02RS-Sep03	0.39256	0.24567	0.34323	0.1619
5	05LV-Aug19	0.3265	0.23688	0.32025	0.15696
6	05LV-Aug24	0.31674	0.23336	0.3206	0.15617
7	05LV-Sep03	0.32581	0.25683	0.32494	0.16947
8	16LV-Sep02	0.3527	0.23882	0.32407	0.15992
9	16RS-Sep01	0.33931	0.24893	0.32943	0.17498
10	18LV-Aug06	0.41805	0.2586	0.3596	0.16355
11	18LV-Aug13	0.38352	0.25096	0.35764	0.16537
12	18LV-Aug20	0.3589	0.23662	0.34984	0.15069
13	18LV-Aug27	0.4141	0.29679	0.34997	0.16438
14	18RS-Aug06	0.36742	0.27134	0.34059	0.16505
15	18RS-Aug23	0.33483	0.24252	0.33126	0.16933
16	18RS-Aug30	0.35343	0.30645	0.34418	0.16604
Table S5b. Locus-by-locus observed and expected heterozygosity for 16 putative populations collected from Landisville and Rock Springs, Pennsylvania. Cells without any data indicate monomorphic loci.
			02RS-Aug12				02RS-Aug20					02RS-Aug27					02RS-Sep03					05LV-Aug19					05LV-Aug24					05LV-Sep03					16LV-Sep02					16RS-Sep01					18LV-Aug06
		Locus #	Num. Gene copies	Num alleles	Obs. Het.	Exp. Het	Locus #	Num. Gene copies	Num alleles	Obs. Het.	Exp. Het	Locus #	Num. Gene copies	Num alleles	Obs. Het.	Exp. Het	Locus #	Num. Gene copies	Num alleles	Obs. Het.	Exp. Het	Locus #	Num. Gene copies	Num alleles	Obs. Het.	Exp. Het	Locus #	Num. Gene copies	Num alleles	Obs. Het.	Exp. Het	Locus #	Num. Gene copies	Num alleles	Obs. Het.	Exp. Het	Locus #	Num. Gene copies	Num alleles	Obs. Het.	Exp. Het	Locus #	Num. Gene copies	Num alleles	Obs. Het.	Exp. Het	Locus #	Num. Gene copies	Num alleles
1	Hz6_0	1	46	2	0.04348	0.12464	1	48	2	0.08333	0.15603	1	46	2	0.13043	0.12464	1	226	2	0.06195	0.09302	1	70	2	0.02857	0.02857	1					1	180	2	0.05556	0.05431	1	158	2	0.05063	0.07353	1	172	2	0.04651	0.06773	1	46	2
2	Hz6_1	2	46	2	0.3913	0.47633	2	48	2	0.54167	0.48848	2	42	2	0.52381	0.47038	2	224	2	0.77679	0.499	2	70	2	0.45714	0.47371	2	104	2	0.40385	0.43745	2	184	2	0.5	0.48753	2	166	2	0.48193	0.49419	2	174	2	0.51724	0.47073	2	46	2
3	Hz6_2	3	46	2	0	0.51014	3	48	2	0.04167	0.50266	3	46	2	0	0.50242	3	226	2	0.23894	0.40389	3	70	2	0.42857	0.37308	3	104	2	0.44231	0.38816	3	184	2	0.33696	0.41239	3	164	2	0.26829	0.34476	3	174	2	0.47126	0.44309	3	46	2
4	Hz6_5	4					4					4					4	226	2	0.73451	0.47139	4					4					4					4	166	2	0.3494	0.48872	4	174	2	0.35632	0.49332	4	46	2
5	Hz6_12	5	46	2	0.47826	0.47633	5	48	2	0.45833	0.40337	5	46	2	0.26087	0.34783	5	228	2	0.46491	0.39365	5	66	2	0.36364	0.33939	5	104	2	0.42308	0.37864	5	184	2	0.34783	0.34212	5	166	2	0.36145	0.31311	5	174	2	0.27586	0.4215	5	46	2
6	Hz6_17	6	46	2	0.82609	0.49565	6	46	2	0.82609	0.50725	6	44	2	0.81818	0.49471	6	226	2	0.70796	0.46914	6	68	2	0.67647	0.45435	6	104	2	0.69231	0.45706	6	184	2	0.29348	0.29597	6	166	2	0.22892	0.20394	6	174	2	0.29885	0.31626	6	46	2
7	Hz6_18	7	46	2	0.08696	0.16232	7	48	2	0.125	0.11968	7	46	2	0.13043	0.12464	7	228	2	0.10526	0.10016	7	70	2	0.25714	0.22733	7	104	2	0.09615	0.09242	7	184	2	0.17391	0.19482	7	164	2	0.84146	0.49401	7	174	2	0.09195	0.08823	7	46	2
8	Hz6_19	8	46	2	0.86957	0.51014	8	48	2	0.91667	0.50709	8	46	2	0.91304	0.51111	8	228	2	0.94737	0.50205	8	70	2	0.94286	0.50559	8	104	2	1	0.50485	8	178	2	0.86517	0.50181	8	166	2	0.16867	0.34173	8	174	2	0.90805	0.50289	8	42	2
9	Hz6_38	9	44	2	0.04545	0.20613	9	44	2	0.09091	0.30444	9	46	2	0.21739	0.32174	9	216	2	0.23148	0.3624	9	70	2	0.25714	0.34161	9	98	2	0.2449	0.37366	9	172	2	0.01163	0.43758	9					9					9
10	Hz6_43	10					10					10					10					10	66	2	0.0303	0.0303	10	100	2	0	0.0396	10					10					10					10
11	Hz6_47	11	46	2	0.26087	0.29372	11	48	2	0.25	0.28369	11	46	2	0.21739	0.44928	11	228	2	0.42105	0.36309	11	70	2	0.4	0.43727	11	104	2	0.34615	0.43017	11	182	2	0.42857	0.45516	11	166	2	0.27711	0.39759	11	174	2	0.41379	0.36835	11	46	2
12	Hz6_50	12	44	2	0.72727	0.47357	12	46	2	0.78261	0.51014	12	44	2	0.72727	0.51163	12	226	2	0.53982	0.50206	12	70	2	0.51429	0.50352	12	104	2	0.53846	0.46826	12	184	2	0.27174	0.25178	12	166	2	1	0.50303	12	174	2	0.35632	0.49332	12	44	2
13	Hz6_55	13	46	2	0.52174	0.48696	13	48	2	0.45833	0.43883	13	46	2	0.52174	0.51014	13	228	2	0.45614	0.43404	13	70	2	0.45714	0.43727	13	104	2	0.5	0.44436	13	184	2	0.48913	0.46561	13	166	2	0.10843	0.1245	13	174	2	0.52874	0.50123	13	46	2
14	Hz6_58	14	46	2	0.04348	0.04348	14	48	2	0.125	0.11968	14	46	2	0.08696	0.08502	14	228	2	0.05263	0.05147	14	70	2	0.14286	0.13458	14	104	2	0.01923	0.01923	14	184	2	0.06522	0.06344	14	166	2	0.42169	0.42826	14	174	2	0.36782	0.40183	14	46	2
15	Hz6_65	15	46	2	0.08696	0.08502	15	48	2	0.04167	0.04167	15	46	2	0.13043	0.12464	15	228	2	0.14035	0.14607	15	70	2	0.17143	0.15901	15	104	2	0.09615	0.09242	15	184	2	0.07609	0.07359	15	166	2	0.07229	0.0701	15	174	2	0.16092	0.16796	15	46	2
16	Hz6_68	16	46	2	0.13043	0.19807	16	48	2	0.16667	0.15603	16	46	2	0.26087	0.29372	16	228	2	0.15789	0.1892	16	68	2	0.14706	0.18745	16	104	2	0.15385	0.1755	16	184	2	0.17391	0.15966	16	166	2	0.21687	0.19452	16	174	2	0.16092	0.18657	16	46	2
17	Hz6_70	17	46	2	0.08696	0.08502	17	48	2	0.16667	0.15603	17	46	2	0.13043	0.19807	17	228	2	0.17544	0.17513	17	68	2	0.02941	0.3806	17	100	2	0	0.14869	17	184	2	0.01087	0.30975	17	166	2	0.15663	0.20394	17	174	2	0.02299	0.27161	17	46	2
18	Hz6_73	18	46	2	0.3913	0.32174	18	48	2	0.29167	0.25443	18	46	2	0.30435	0.26377	18	226	2	0.30973	0.27504	18	70	2	0.37143	0.34161	18	104	2	0.26923	0.23525	18	184	2	0.20652	0.20331	18	156	2	0.20513	0.27957	18	174	2	0.25287	0.28702	18	46	2
19	Hz6_79	19	44	2	0.27273	0.44397	19	46	2	0.30435	0.37198	19	46	2	0.21739	0.47633	19					19	64	2	0.09375	0.36458	19	102	2	0.15686	0.41934	19	180	2	0.15556	0.43104	19					19	160	2	0.2	0.40126	19
20	Hz6_96	20	46	2	0.56522	0.44928	20	48	2	0.45833	0.36082	20	46	2	0.34783	0.43285	20	228	2	0.42982	0.40169	20	70	2	0.45714	0.48696	20	104	2	0.34615	0.37864	20	184	2	0.42391	0.41239	20	166	2	0.44578	0.45367	20	174	2	0.4023	0.42608	20	46	2
21	Hz6_103	21	46	2	0.34783	0.43285	21	48	2	0.41667	0.51064	21	46	2	0.56522	0.47633	21	228	2	0.44737	0.46507	21	68	2	0.41176	0.46356	21	104	2	0.34615	0.37864	21	182	2	0.40659	0.44059	21	164	2	0.40244	0.44015	21	174	2	0.4023	0.40695	21	46	2
22	Hz6_104	22	46	2	0.43478	0.34783	22	48	2	0.45833	0.36082	22	46	2	0.3913	0.44928	22	228	2	0.2807	0.279	22	70	2	0.28571	0.24845	22	104	2	0.32692	0.36875	22	176	2	0.34091	0.36545	22	166	2	0.42169	0.36166	22	174	2	0.37931	0.37426	22	46	2
23	Hz6_105	23					23					23					23					23					23					23					23					23					23
24	Hz6_113	24	46	2	0.13043	0.12464	24	48	2	0.16667	0.15603	24					24	228	2	0.75439	0.48675	24	70	2	0.02857	0.08323	24					24	176	2	0.86364	0.50182	24	164	2	0.81707	0.50299	24	174	2	0.09195	0.10896	24	46	2
25	Hz6_114	25	46	2	0.43478	0.43285	25	48	2	0.29167	0.40337	25	46	2	0.34783	0.34783	25	228	2	0.45614	0.48675	25	70	2	0.45714	0.47371	25	104	2	0.46154	0.47797	25	184	2	0.38043	0.41239	25	166	2	0.45783	0.44162	25	174	2	0.47126	0.41678	25	46	2
26	Hz6_137	26	46	2	0.30435	0.26377	26	46	2	0.21739	0.32174	26	46	2	0.21739	0.26377	26	228	2	0.25439	0.28484	26	70	2	0.08571	0.26874	26	104	2	0.15385	0.23525	26	184	2	0.21739	0.22808	26	160	2	0.125	0.22013	26	172	2	0.2093	0.28968	26	46	2
27	Hz6_148	27					27					27					27					27					27					27					27					27					27
28	Hz6_154	28	46	2	0.30435	0.26377	28	48	2	0.33333	0.4539	28	46	2	0.52174	0.43285	28	228	2	0.4386	0.42739	28	70	2	0.48571	0.44762	28	104	2	0.44231	0.42252	28	184	2	0.42391	0.45278	28	164	2	0.39024	0.41658	28	172	2	0.43023	0.43758	28	46	2
29	Hz6_156	29	44	2	0.18182	0.44397	29	46	2	0.26087	0.43285	29	44	2	0.31818	0.426	29	222	2	0.26126	0.37442	29	66	2	0.27273	0.46107	29	100	2	0.28	0.45333	29	180	2	0.25556	0.40838	29	164	2	0.20732	0.45631	29	160	2	0.225	0.38962	29	46	2
30	Hz6_163	30	46	2	0.43478	0.3942	30	48	2	0.29167	0.43883	30	46	2	0.34783	0.43285	30	228	2	0.4386	0.41317	30	70	2	0.45714	0.43727	30	104	2	0.42308	0.39731	30	182	2	0.26374	0.42839	30	164	2	0.40244	0.45631	30	174	2	0.44828	0.47073	30	46	2
31	Hz6_164	31	44	2	0.13636	0.20613	31	46	2	0.52174	0.46377	31	46	2	0.17391	0.29372	31	220	2	0.23636	0.28709	31	68	2	0.26471	0.27524	31	100	2	0.26	0.39818	31	182	2	0.15385	0.26179	31	160	2	0.2375	0.26533	31	172	2	0.18605	0.35904	31	46	2
32	Hz6_168	32	44	2	0.40909	0.33298	32	48	2	0.29167	0.36082	32	46	2	0.43478	0.3942	32	228	2	0.35088	0.35366	32	70	2	0.54286	0.42609	32	104	2	0.38462	0.33682	32	184	2	0.28261	0.2889	32	160	2	0.3375	0.37099	32	174	2	0.41379	0.38004	32	46	2
33	Hz6_190	33	46	2	0.3913	0.37198	33	48	2	0.25	0.4539	33	46	2	0.43478	0.34783	33	228	2	0.26316	0.29059	33	70	2	0.25714	0.26874	33	104	2	0.36538	0.32543	33	184	2	0.29348	0.26699	33	166	2	0.31325	0.31311	33	172	2	0.40698	0.36523	33	46	2
34	Hz6_193	34	46	2	0.08696	0.08502	34	48	2	0.04167	0.04167	34					34	228	2	0.05263	0.06801	34					34	104	2	0.07692	0.07468	34	184	2	0.05435	0.07359	34	166	2	0.04819	0.04732	34	174	2	0.06897	0.06697	34
35	Hz6_199	35	46	2	0.3913	0.47633	35	48	2	0.45833	0.50266	35	46	2	0.43478	0.48696	35	226	2	0.51327	0.49904	35	70	2	0.51429	0.50683	35	104	2	0.40385	0.46285	35	184	2	0.31522	0.46561	35					35	172	2	0.44186	0.50265	35	46	2
36	Hz6_200	36					36					36					36					36					36					36	184	2	0.02174	0.04277	36	166	2	0.04819	0.04732	36	168	2	0.03571	0.03529	36
37	Hz6_213	37	46	2	0	0.50242	37	48	2	0.04167	0.36082	37	46	2	0	0.46377	37	228	2	0.18421	0.28484	37	70	2	0.22857	0.24845	37	102	2	0.21569	0.19433	37	182	2	0.21978	0.24625	37	162	2	0.16049	0.18902	37	174	2	0.25287	0.25566	37	46	2
38	Hz6_227	38					38	48	2	0.08333	0.08156	38					38	226	2	0.71681	0.47139	38	70	2	0.02857	0.02857	38	104	2	0.03846	0.03809	38	180	2	0.88889	0.50255	38	160	2	0.775	0.50031	38	172	2	0.87209	0.50122	38	46	2
39	Hz6_241	39	46	2	0.34783	0.46377	39	44	2	0.40909	0.50211	39	46	2	0.47826	0.50725	39	226	2	0.33628	0.4295	39	66	2	0.30303	0.4289	39	102	2	0.31373	0.48923	39	184	2	0.34783	0.4077	39	166	2	0.37349	0.41862	39	170	2	0.38824	0.46286	39	46	2
40	Hz6_250	40	46	2	0.04348	0.04348	40					40	46	2	0	0.08502	40	226	2	0.70796	0.49086	40	68	2	0.94118	0.50571	40	102	2	0.98039	0.50476	40	184	2	0.06522	0.08363	40	158	2	0.86076	0.49923	40	168	2	0.90476	0.50271	40	46	2
41	Hz6_260	41	46	2	0.13043	0.12464	41	48	2	0.125	0.11968	41	46	2	0.08696	0.08502	41	228	2	0.09649	0.09224	41	70	2	0.05714	0.05631	41	102	2	0.07843	0.0761	41	184	2	0.08696	0.10335	41	152	2	0.03947	0.06405	41	174	2	0.06897	0.08823	41	46	2
42	Hz6_261	42	46	2	0.34783	0.34783	42	48	2	0.25	0.28369	42	44	2	0.18182	0.24101	42	228	2	0.35088	0.37221	42	70	2	0.31429	0.26874	42	104	2	0.36538	0.36875	42	184	2	0.31522	0.33589	42	166	2	0.22892	0.27404	42	174	2	0.26437	0.30915	42	46	2
43	Hz6_276	43	44	2	0.95455	0.51057	43	48	2	0.91667	0.51064	43	46	2	0.95652	0.51014	43	226	2	0.95575	0.50218	43	70	2	0.94286	0.50725	43	102	2	0.98039	0.50476	43	178	2	0.96629	0.50276	43					43	172	2	0.9186	0.50231	43	46	2
44	Hz6_294	44					44					44					44	226	2	0.72566	0.46442	44					44					44	168	2	0.82143	0.48695	44	166	2	0.06024	0.05878	44					44	42	2
45	Hz6_299	45	46	2	0.26087	0.23188	45	48	2	0.04167	0.11968	45	46	2	0.04348	0.04348	45	228	2	0.12281	0.14607	45	70	2	0.11429	0.20538	45	104	2	0.09615	0.15963	45	182	2	0.0989	0.13339	45	166	2	0.01205	0.14524	45	174	2	0.1954	0.19567	45	46	2
46	Hz6_304	46	46	2	0.47826	0.49565	46	48	2	0.29167	0.50975	46	46	2	0.3913	0.47633	46	228	2	0.39474	0.49753	46	70	2	0.42857	0.48075	46	104	2	0.46154	0.48618	46	180	2	0.36667	0.4923	46	166	2	0.38554	0.48193	46	174	2	0.4023	0.48136	46	46	2
47	Hz6_310	47	46	2	0.34783	0.29372	47	48	2	0.54167	0.40337	47	46	2	0.30435	0.26377	47	228	2	0.44737	0.34883	47	70	2	0.48571	0.37308	47	104	2	0.44231	0.34783	47	184	2	0.55435	0.40289	47	166	2	0.38554	0.31311	47	172	2	0.34884	0.28968	47	46	2
48	Hz6_327	48	46	2	0.3913	0.32174	48	48	2	0.33333	0.4539	48	46	2	0.34783	0.29372	48	224	2	0.32143	0.34833	48	70	2	0.25714	0.34161	48	104	2	0.32692	0.36875	48	182	2	0.20879	0.26938	48	162	2	0.95062	0.50188	48	174	2	0.32184	0.30191	48	46	2
49	Hz6_346	49	46	2	0.47826	0.47633	49	48	2	0.5	0.50709	49	46	2	0.52174	0.51014	49	228	2	0.48246	0.50216	49	70	2	0.65714	0.49234	49	104	2	0.44231	0.50019	49	182	2	0.50549	0.4925	49	164	2	0.58537	0.49559	49	174	2	0.45977	0.49963	49	46	2
50	Hz6_352	50	46	2	0.30435	0.37198	50	48	2	0.375	0.31117	50	46	2	0.43478	0.46377	50	228	2	0.31579	0.32352	50	70	2	0.22857	0.2882	50	104	2	0.44231	0.34783	50	184	2	0.3587	0.36012	50	162	2	0.93827	0.50119	50	174	2	0.25287	0.27161	50	46	2
51	Hz6_361	51	46	2	0.08696	0.08502	51	48	2	0.04167	0.04167	51	46	2	0.04348	0.04348	51	226	2	0.00885	0.00885	51	70	2	0.02857	0.02857	51	104	2	0.03846	0.03809	51	184	2	0.08696	0.08363	51					51	174	2	0.02299	0.02286	51
52	hZ6_386	52					52					52					52	226	2	0.02655	0.02631	52					52					52					52	164	2	0.02439	0.02424	52	174	2	0.02299	0.02286	52
53	Hz6_388	53	46	2	0.26087	0.46377	53	48	2	0.54167	0.4672	53	46	2	0.3913	0.37198	53	228	2	0.42982	0.48176	53	70	2	0.45714	0.45714	53	102	2	0.23529	0.40225	53	184	2	0.40217	0.47131	53	162	2	0.41975	0.43862	53	174	2	0.36782	0.43904	53	46	2
54	Hz6_390	54	46	2	0.26087	0.23188	54	48	2	0.08333	0.15603	54	46	2	0.08696	0.08502	54	228	2	0.17544	0.22954	54	70	2	0.02857	0.42609	54	104	2	0	0.33682	54	184	2	0.17391	0.17748	54	166	2	0.19277	0.23133	54	174	2	0.16092	0.16796	54	46	2
55	Hz6_393	55					55					55					55					55	70	2	0.02857	0.02857	55					55					55					55					55
56	Hz6_406	56	46	2	1	0.51111	56	48	2	1	0.51064	56	46	2	1	0.51111	56	228	2	1	0.5022	56					56					56	184	2	1	0.50273	56	166	2	1	0.50303	56	172	2	1	0.50292	56	46	2
57	Hz6_408	57	46	2	0.52174	0.3942	57	48	2	0.33333	0.33688	57	46	2	0.34783	0.29372	57	226	2	0.51327	0.46914	57	70	2	0.4	0.43727	57	104	2	0.42308	0.44436	57	182	2	0.48352	0.36865	57	166	2	0.45783	0.36802	57	168	2	0.47619	0.37725	57	46	2
58	Hz6_426	58					58					58					58					58					58					58	178	2	0	0.02234	58	160	2	0.025	0.02484	58	172	2	0.03488	0.03448	58
59	Hz6_429	59	46	2	0.34783	0.3942	59	48	2	0.375	0.48848	59	46	2	0.52174	0.51014	59	226	2	0.46903	0.47139	59	70	2	0.54286	0.44762	59	104	2	0.38462	0.44436	59	184	2	0.34783	0.4077	59	166	2	0.3012	0.3862	59	174	2	0.4023	0.45798	59	46	2
60	Hz6_444	60	46	2	0.56522	0.50725	60	48	2	0.45833	0.48848	60	46	2	0.65217	0.51111	60	226	2	0.39823	0.47957	60	70	2	0.42857	0.48075	60	104	2	0.48077	0.48973	60	184	2	0.46739	0.49982	60	166	2	0.53012	0.49069	60	174	2	0.50575	0.50282	60	46	2
61	Hz6_536	61	46	2	0.04348	0.04348	61	48	2	0.20833	0.1906	61	46	2	0.04348	0.04348	61	224	2	0.70536	0.49067	61	70	2	0.08571	0.08323	61	104	2	0.13462	0.12677	61	184	2	0.11957	0.11303	61	166	2	0.22892	0.36166	61	160	2	0.2125	0.32948	61	46	2
62	Hz6_551	62	46	2	0.30435	0.41449	62	48	2	0.375	0.43883	62	46	2	0.43478	0.43285	62	228	2	0.42105	0.44037	62	70	2	0.51429	0.45714	62	104	2	0.48077	0.4509	62	184	2	0.36957	0.43407	62	164	2	0.17073	0.17717	62	174	2	0.29885	0.31626	62	46	2
63	Hz6_559	63	46	2	0.6087	0.50242	63	48	2	0.625	0.50266	63	46	2	0.3913	0.51111	63	228	2	0.5614	0.49973	63	70	2	0.51429	0.48696	63	104	2	0.5	0.49813	63	184	2	0.55435	0.50125	63	166	2	0.42169	0.42826	63	174	2	0.3908	0.38004	63	46	2
64	Hz6_580	64					64					64					64	228	2	0.01754	0.01747	64	70	2	0.02857	0.02857	64	104	2	0.01923	0.01923	64					64	166	2	0.07229	0.0701	64	174	2	0.08046	0.07767	64
65	Hz6_589	65					65					65					65	228	2	0.04386	0.04309	65	70	2	0.05714	0.05631	65	104	2	0.03846	0.03809	65	184	2	0.02174	0.02162	65					65	174	2	0.3908	0.41193	65	46	2
66	Hz6_620	66	44	2	0.40909	0.4852	66	48	2	0.5	0.49645	66	46	2	0.21739	0.41449	66	228	2	0.39474	0.50185	66	70	2	0.4	0.50683	66	104	2	0.38462	0.49813	66	178	2	0.41573	0.50282	66	166	2	0.3494	0.48872	66	174	2	0.35632	0.49332	66	46	2
67	Hz6_667	67					67					67					67	228	2	0.00877	0.00877	67	70	2	0.02857	0.02857	67					67					67					67					67	46	2
68	Hz6_707	68	46	2	0.08696	0.08502	68	48	2	0.25	0.2234	68	46	2	0.13043	0.12464	68	226	2	0.23009	0.24417	68	70	2	0.14286	0.18261	68	104	2	0.21154	0.191	68	184	2	0.15217	0.17748	68	164	2	0.15854	0.18697	68	174	2	0.17241	0.17733	68	46	2
69	Hz6_733	69	44	2	0	0.30444	69	44	2	0	0.16913	69	44	2	0.04545	0.20613	69	208	2	0.61538	0.49777	69	68	2	0	0.05795	69	104	2	0.01923	0.22087	69	174	2	0.06897	0.22218	69	156	2	0.02564	0.18528	69	166	2	0.07229	0.24885	69	44	2
70	Hz6_809	70	46	2	0.08696	0.3942	70	48	2	0.125	0.40337	70	46	2	0.26087	0.3942	70	214	2	0.21495	0.32263	70	66	2	0.15152	0.41632	70	100	2	0.12	0.34667	70					70	156	2	0.19231	0.28809	70	168	2	0.16667	0.27944	70	44	2
71	Hz6_875	71					71					71					71	228	2	0.00877	0.00877	71					71	104	2	0	0.03809	71					71					71					71
72	Hz6_954	72	46	2	0.47826	0.47633	72	46	2	0.52174	0.51014	72	46	2	0.52174	0.48696	72	226	2	0.53982	0.50081	72	70	2	0.54286	0.49234	72	104	2	0.36538	0.48226	72	184	2	0.41304	0.49679	72	166	2	0.54217	0.49573	72	172	2	0.46512	0.50265	72	46	2
73	Hz6_992	73					73					73					73	226	2	0.72566	0.47355	73					73					73					73					73	174	2	0.01149	0.01149	73	46	2
74	Hz6_1004	74	46	2	0.34783	0.29372	74	48	2	0.33333	0.42199	74	46	2	0.43478	0.3942	74	228	2	0.48246	0.41684	74	70	2	0.51429	0.43727	74	104	2	0.36538	0.42252	74	184	2	0.46739	0.41239	74	166	2	0.39759	0.41862	74	174	2	0.32184	0.35612	74	46	2
75	Hz6_1018	75	46	2	0.13043	0.12464	75					75	46	2	0.13043	0.12464	75	228	2	0.70175	0.49664	75	68	2	0.02941	0.02941	75	104	2	0.07692	0.07468	75	184	2	0.1413	0.13204	75	166	2	0.08434	0.08127	75	174	2	0.10345	0.11913	75	44	2
76	Hz6_1142	76	46	2	0.08696	0.08502	76	48	2	0.04167	0.04167	76	46	2	0.04348	0.04348	76	228	2	0.04386	0.04309	76	64	2	0.96875	0.50744	76	102	2	0.96078	0.50417	76	184	2	0.05435	0.05316	76	166	2	0.0241	0.04732	76	172	2	0.04651	0.0457	76	46	2
77	Hz6_1150	77	46	2	0.47826	0.51111	77	48	2	0.5	0.4539	77	44	2	0.27273	0.49471	77	228	2	0.35965	0.46012	77	70	2	0.51429	0.50352	77	104	2	0.38462	0.49291	77	184	2	0.42391	0.48129	77	166	2	0.44578	0.46097	77	174	2	0.43678	0.49485	77	44	2
78	Hz6_1223	78					78					78					78	226	2	0.76106	0.47355	78					78	104	2	0.01923	0.01923	78					78	166	2	0.87952	0.49573	78	174	2	1	0.50289	78	46	2
79	Hz6_1264	79	46	2	0.56522	0.51111	79	48	2	0.375	0.50975	79	46	2	0.65217	0.49565	79	228	2	0.48246	0.50185	79	70	2	0.6	0.48075	79	104	2	0.51923	0.49571	79	184	2	0.48913	0.5022	79	166	2	0.44578	0.50303	79	174	2	0.47126	0.50183	79	46	2
80	Hz6_1311	80	46	2	0.56522	0.49565	80	48	2	0.54167	0.48848	80	46	2	0.52174	0.51014	80	228	2	0.46491	0.49907	80	70	2	0.51429	0.50683	80	104	2	0.51923	0.50467	80	182	2	0.53846	0.50252	80	164	2	0.45122	0.49701	80	174	2	0.47126	0.50262	80	46	2
81	Hz6_1338	81					81					81					81	228	2	0.03509	0.03462	81	70	2	0.02857	0.02857	81	104	2	0.01923	0.01923	81					81					81	174	2	0.02299	0.02286	81	46	2
82	Hz6_1630	82					82					82					82	228	2	0.76316	0.47403	82					82					82					82	162	2	0.85185	0.49206	82	168	2	0.92857	0.50043	82	46	2
83	Hz6_1646	83					83					83					83	222	2	0.74775	0.4703	83					83					83					83					83					83	42	2
84	Hz6_1764	84					84					84					84					84	70	2	0.02857	0.02857	84					84					84					84					84
85	Hz6_1790	85					85					85					85	228	2	0.01754	0.01747	85					85					85					85	166	2	0.0241	0.02395	85					85
[truncated: 32 more columns]

## Sheet: Table S6. Molecular diversity
Table S6. Total number and mean of transitions, transversions, substitutions, private substitution sites, and the molecular diversity for 16 putative Helicoverpa zea populations collected from Landisville and Rocksprings, Pennsylvania.
	02RS-Aug12	02RS-Aug20	02RS-Aug27	02RS-Sep03	05LV-Aug19	05LV-Aug24	05LV-Sep03	16LV-Sep02	16RS-Sep01	18LV-Aug06	18LV-Aug13	18LV-Aug20	18LV-Aug27	18RS-Aug06	18RS-Aug23	18RS-Aug30	Mean	s.d.
No. of transitions	44	43	43	53	47	47	47	46	52	48	42	44	50	46	48	47	46.688	3.135
No. of transversions	20	20	19	24	23	21	21	23	22	22	22	19	21	21	20	21	21.188	1.424
No. of substitutions	64	63	62	77	70	68	68	69	74	70	64	63	71	67	68	68	67.875	4.113
No. private subst. sites	0	0	0	0	2	0	0	0	0	0	0	0	0	0	0	1	0.188	0.544
Pi	24.124	24.762	24.243	29.854	24.716	24.366	24.69	25.432	27.467	28.548	26.03	24.985	27.787	25.553	24.966	25.971	25.8433	1.69488

## Sheet: Table S7- HWE Stats
Table S7. Locus by locus exact tests for Hardy–Weinberg equilibrium. Number of genotypes, expected heterozygosity, observed heterozygosity, P-valus, and standard deviation are shown for all populations and individual populations.
			All populations					02RS-Aug12						02RS-Aug20				02RS-Aug27					02RS-Sep03			05LV-Aug19					05LV-Aug24					05LV-Sep03					16LV-Sep02						16RS-Sep01
Locus	# Genotypes	Obs. Het.	Exp. Het.	P-value	STDEV	# Genotypes	Obs. Het.	Exp. Het.	P-value	STDEV	# Genotypes	Obs. Het.	Exp. Het.	P-value	STDEV	# Genotypes	Obs. Het.	Exp. Het.	P-value	STDEV	# Genotypes	Obs. Het.	Exp. Het.	P-value	STDEV	# Genotypes	Obs. Het.	Exp. Het.	P-value	STDEV	# Genotypes	Obs. Het.	Exp. Het.	P-value	STDEV	# Genotypes	Obs. Het.	Exp. Het.	P-value	STDEV	# Genotypes	Obs. Het.	Exp. Het.	P-value	STDEV	# Genotypes	Obs. Het.	Exp. Het.	P-value
Hz6_0	690	0.05072	0.06584	3e-05	2e-05	23	0.04348	0.12464	0.06622	0.00074	24	0.08333	0.15603	0.1241	0.00108	23	0.13043	0.12464	1	0	113	0.06195	0.09302	0.01951	0.00042	35	0.02857	0.02857	1	0	Monomorphic locus. No test done					90	0.05556	0.05431	1	0	79	0.05063	0.07353	0.09161	0.00092	86	0.04651	0.06773	0.08522
Hz6_1	701	0.4893	0.47558	0.46511	0.00138	23	0.3913	0.47633	0.41278	0.00142	24	0.54167	0.48848	0.68419	0.00151	21	0.52381	0.47038	0.6649	0.00151	112	0.77679	0.499	0	0	35	0.45714	0.47371	1	0	52	0.40385	0.43745	0.74668	0.00153	92	0.5	0.48753	0.83128	0.00117	83	0.48193	0.49419	0.83001	0.00125	87	0.51724	0.47073	0.48781
Hz6_2	703	0.32859	0.41984	0	0	23	0	0.51014	0	0	24	0.04167	0.50266	0	0	23	0	0.50242	0	0	113	0.23894	0.40389	3e-05	2e-05	35	0.42857	0.37308	0.64778	0.00144	52	0.44231	0.38816	0.47184	0.00173	92	0.33696	0.41239	0.1202	0.00094	82	0.26829	0.34476	0.05472	0.00069	87	0.47126	0.44309	0.63081
Hz6_5	704	0.20312	0.27257	0	0		Monomorphic locus. No test done					Monomorphic locus. No test done					Monomorphic locus. No test done				113	0.73451	0.47139	0	0		Monomorphic locus. No test done					Monomorphic locus. No test done					Monomorphic locus. No test done				83	0.3494	0.48872	0.01145	0.00033	87	0.35632	0.49332	0.01418
Hz6_12	703	0.36558	0.37348	0.61163	0.0012	23	0.47826	0.47633	1	0	24	0.45833	0.40337	0.63314	0.00173	23	0.26087	0.34783	0.25086	0.00129	114	0.46491	0.39365	0.05701	0.00072	33	0.36364	0.33939	1	0	52	0.42308	0.37864	0.47606	0.00151	92	0.34783	0.34212	1	0	83	0.36145	0.31311	0.28482	0.00143	87	0.27586	0.4215	0.00211
Hz6_17	701	0.40514	0.43099	0.11669	0.00071	23	0.82609	0.49565	0.00155	0.00011	23	0.82609	0.50725	0.00275	0.00017	22	0.81818	0.49471	0.00184	0.00013	113	0.70796	0.46914	0	0	34	0.67647	0.45435	0.00427	0.00021	52	0.69231	0.45706	3e-05	2e-05	92	0.29348	0.29597	1	0		Monomorphic locus. No test done				87	0.29885	0.31626	0.73078
Hz6_18	704	0.13494	0.14054	0.27108	0.00137	23	0.08696	0.16232	0.1328	0.00106	24	0.125	0.11968	1	0	23	0.13043	0.12464	1	0	114	0.10526	0.10016	1	0	35	0.25714	0.22733	1	0	52	0.09615	0.09242	1	0	92	0.17391	0.19482	0.28074	0.00143	83	0.22892	0.20394	0.58905	0.00156	87	0.09195	0.08823	1
Hz6_19	700	0.83286	0.49791	0	0	23	0.86957	0.51014	0.00075	8e-05	24	0.91667	0.50709	7e-05	3e-05	23	0.91304	0.51111	5e-05	2e-05	114	0.94737	0.50205	0	0	35	0.94286	0.50559	0	0	52	1	0.50485	0	0	89	0.86517	0.50181	0	0	82	0.84146	0.49401	0	0	87	0.90805	0.50289	0
Hz6_38	669	0.1704	0.34483	0	0	22	0.04545	0.20613	0.00814	0.00025	22	0.09091	0.30444	0.00547	0.00022	23	0.21739	0.32174	0.16578	0.00123	108	0.23148	0.3624	0.00023	5e-05	35	0.25714	0.34161	0.15409	0.00118	49	0.2449	0.37366	0.02358	0.00051	86	0.01163	0.43758	0	0	83	0.16867	0.34173	0	0	77	0.15584	0.29947	6e-05
Hz6_43	691	0.00145	0.00434	0.00234	0.00014		Monomorphic locus. No test done					Monomorphic locus. No test done					Monomorphic locus. No test done					Monomorphic locus. No test done				33	0.0303	0.0303	1	0	50	0	0.0396	0.01089	0.00034		Monomorphic locus. No test done					Monomorphic locus. No test done					Monomorphic locus. No test done
Hz6_47	703	0.32432	0.4158	0	0	23	0.26087	0.29372	0.51779	0.00158	24	0.25	0.28369	0.50351	0.00153	23	0.21739	0.44928	0.02016	0.00042	114	0.42105	0.36309	0.11748	0.00083	35	0.4	0.43727	0.70093	0.00147	52	0.34615	0.43017	0.19518	0.00123	91	0.42857	0.45516	0.64736	0.00132	83	0.27711	0.39759	0.01082	0.00031	87	0.41379	0.36835	0.37408
Hz6_50	700	0.54	0.48845	0.00682	0.00024	22	0.72727	0.47357	0.01624	0.00036	23	0.78261	0.51014	0.01452	0.00038	22	0.72727	0.51163	0.08711	0.00085	113	0.53982	0.50206	0.45312	0.0016	35	0.51429	0.50352	1	0	52	0.53846	0.46826	0.37056	0.00148	92	0.27174	0.25178	0.68551	0.00137	83	1	0.50303	0	0	87	0.35632	0.49332	0.01587
Hz6_55	705	0.43262	0.48904	0.00249	0.00015	23	0.52174	0.48696	1	0	24	0.45833	0.43883	1	0	23	0.52174	0.51014	1	0	114	0.45614	0.43404	0.66766	0.00152	35	0.45714	0.43727	1	0	52	0.5	0.44436	0.53028	0.00157	92	0.48913	0.46561	0.65439	0.00141	83	0.10843	0.1245	0.29704	0.00146	87	0.52874	0.50123	0.66721
Hz6_58	703	0.24609	0.25528	0.37364	0.00147	23	0.04348	0.04348	1	0	24	0.125	0.11968	1	0	23	0.08696	0.08502	1	0	114	0.05263	0.05147	1	0	35	0.14286	0.13458	1	0	52	0.01923	0.01923	1	0	92	0.06522	0.06344	1	0	83	0.42169	0.42826	1	0	87	0.36782	0.40183	0.43538
Hz6_65	705	0.11631	0.11712	0.74518	0.0013	23	0.08696	0.08502	1	0	24	0.04167	0.04167	1	0	23	0.13043	0.12464	1	0	114	0.14035	0.14607	0.51554	0.00153	35	0.17143	0.15901	1	0	52	0.09615	0.09242	1	0	92	0.07609	0.07359	1	0	83	0.07229	0.0701	1	0	87	0.16092	0.16796	0.52998
Hz6_68	704	0.17898	0.18376	0.54049	0.00156	23	0.13043	0.19807	0.2157	0.00125	24	0.16667	0.15603	1	0	23	0.26087	0.29372	0.52108	0.00179	114	0.15789	0.1892	0.10469	0.00098	34	0.14706	0.18745	0.29214	0.00147	52	0.15385	0.1755	0.37985	0.00151	92	0.17391	0.15966	1	0	83	0.21687	0.19452	0.58495	0.00166	87	0.16092	0.18657	0.21848
Hz6_70	701	0.1127	0.22503	0	0	23	0.08696	0.08502	1	0	24	0.16667	0.15603	1	0	23	0.13043	0.19807	0.21608	0.00124	114	0.17544	0.17513	1	0	34	0.02941	0.3806	0	0	50	0	0.14869	0	0	92	0.01087	0.30975	0	0	83	0.15663	0.20394	0.06172	0.00078	87	0.02299	0.27161	0
Hz6_73	693	0.26407	0.27021	0.57551	0.00162	23	0.3913	0.32174	0.54469	0.00163	24	0.29167	0.25443	1	0	23	0.30435	0.26377	1	0	113	0.30973	0.27504	0.29562	0.00162	35	0.37143	0.34161	1	0	52	0.26923	0.23525	0.57162	0.00161	92	0.20652	0.20331	1	0	78	0.20513	0.27957	0.03089	0.00054	87	0.25287	0.28702	0.26823
Hz6_79	651	0.20276	0.41239	0	0	22	0.27273	0.44397	0.13593	0.00102	23	0.30435	0.37198	0.5621	0.00157	23	0.21739	0.47633	0.01955	0.00054	103	0.23301	0.39782	8e-05	3e-05	32	0.09375	0.36458	0.00015	4e-05	51	0.15686	0.41934	5e-05	2e-05	90	0.15556	0.43104	0	0	74	0.18919	0.38426	7e-05	3e-05	80	0.2	0.40126	0.00014
Hz6_96	705	0.43688	0.42533	0.45735	0.00144	23	0.56522	0.44928	0.3464	0.00153	24	0.45833	0.36082	0.28814	0.00135	23	0.34783	0.43285	0.3625	0.0015	114	0.42982	0.40169	0.49469	0.00142	35	0.45714	0.48696	0.7339	0.0014	52	0.34615	0.37864	0.7099	0.00147	92	0.42391	0.41239	1	0	83	0.44578	0.45367	1	0	87	0.4023	0.42608	0.61998
Hz6_103	702	0.38889	0.43013	0.0116	0.00028	23	0.34783	0.43285	0.36535	0.00141	24	0.41667	0.51064	0.42733	0.00153	23	0.56522	0.47633	0.65017	0.00155	114	0.44737	0.46507	0.68877	0.00142	34	0.41176	0.46356	0.70266	0.00149	52	0.34615	0.37864	0.70596	0.00138	91	0.40659	0.44059	0.47765	0.0015	82	0.40244	0.44015	0.46178	0.00172	87	0.4023	0.40695	1
Hz6_104	701	0.33951	0.33334	0.64985	0.00148	23	0.43478	0.34783	0.53824	0.00155	24	0.45833	0.36082	0.29053	0.00141	23	0.3913	0.44928	0.64259	0.00147	114	0.2807	0.279	1	0	35	0.28571	0.24845	1	0	52	0.32692	0.36875	0.45612	0.00158	88	0.34091	0.36545	0.56002	0.00157	83	0.42169	0.36166	0.21673	0.00131	87	0.37931	0.37426	1
Hz6_105	704	0.00142	0.00142	1	0		Monomorphic locus. No test done					Monomorphic locus. No test done					Monomorphic locus. No test done					Monomorphic locus. No test done					Monomorphic locus. No test done					Monomorphic locus. No test done					Monomorphic locus. No test done					Monomorphic locus. No test done					Monomorphic locus. No test done
Hz6_113	699	0.37053	0.33977	0.01704	0.00034	23	0.13043	0.12464	1	0	24	0.16667	0.15603	1	0		Monomorphic locus. No test done				114	0.75439	0.48675	0	0	35	0.02857	0.08323	0.0424	0.00062		Monomorphic locus. No test done				88	0.86364	0.50182	0	0	82	0.81707	0.50299	0	0	87	0.09195	0.10896	0.23983
Hz6_114	705	0.44113	0.45074	0.59732	0.00162	23	0.43478	0.43285	1	0	24	0.29167	0.40337	0.28897	0.00157	23	0.34783	0.34783	1	0	114	0.45614	0.48675	0.57101	0.00163	35	0.45714	0.47371	1	0	52	0.46154	0.47797	1	0	92	0.38043	0.41239	0.45616	0.00137	83	0.45783	0.44162	0.80495	0.00125	87	0.47126	0.41678	0.30211
Hz6_137	700	0.19857	0.25618	0	0	23	0.30435	0.26377	1	0	23	0.21739	0.32174	0.16462	0.00125	23	0.21739	0.26377	0.41389	0.00145	114	0.25439	0.28484	0.31139	0.00144	35	0.08571	0.26874	0.00087	9e-05	52	0.15385	0.23525	0.03427	0.00058	92	0.21739	0.22808	0.64252	0.00155	80	0.125	0.22013	0.00152	0.00012	86	0.2093	0.28968	0.01773
Hz6_148	705	0.00284	0.00283	1	0		Monomorphic locus. No test done					Monomorphic locus. No test done					Monomorphic locus. No test done					Monomorphic locus. No test done					Monomorphic locus. No test done					Monomorphic locus. No test done					Monomorphic locus. No test done					Monomorphic locus. No test done					Monomorphic locus. No test done
Hz6_154	703	0.4239	0.4249	1	0	23	0.30435	0.26377	1	0	24	0.33333	0.4539	0.35227	0.0014	23	0.52174	0.43285	0.62084	0.00151	114	0.4386	0.42739	0.82892	0.00107	35	0.48571	0.44762	0.71298	0.00145	52	0.44231	0.42252	1	0	92	0.42391	0.45278	0.64127	0.00145	82	0.39024	0.41658	0.59786	0.00159	86	0.43023	0.43758	1
Hz6_156	683	0.25329	0.41016	0	0	22	0.18182	0.44397	0.00979	0.0003	23	0.26087	0.43285	0.12619	0.001	22	0.31818	0.426	0.31057	0.00154	111	0.26126	0.37442	0.00326	0.0002	33	0.27273	0.46107	0.02527	0.0005	50	0.28	0.45333	0.01057	0.00031	90	0.25556	0.40838	0.00074	8e-05	82	0.20732	0.45631	0	0	80	0.225	0.38962	0.00041
Hz6_163	703	0.40398	0.42926	0.14111	0.00127	23	0.43478	0.3942	1	0	24	0.29167	0.43883	0.15363	0.00114	23	0.34783	0.43285	0.36122	0.00155	114	0.4386	0.41317	0.64764	0.00145	35	0.45714	0.43727	1	0	52	0.42308	0.39731	0.73555	0.00141	91	0.26374	0.42839	0.00044	6e-05	82	0.40244	0.45631	0.33129	0.00165	87	0.44828	0.47073	0.64967
Hz6_164	689	0.21626	0.30366	0	0	22	0.13636	0.20613	0.2225	0.00134	23	0.52174	0.46377	0.66147	0.00139	23	0.17391	0.29372	0.09592	0.00082	110	0.23636	0.28709	0.08767	0.00096	34	0.26471	0.27524	1	0	50	0.26	0.39818	0.02581	0.00049	91	0.15385	0.26179	0.00079	9e-05	80	0.2375	0.26533	0.38658	0.00158	86	0.18605	0.35904	0
Hz6_168	701	0.37518	0.36545	0.53953	0.00178	22	0.40909	0.33298	0.5366	0.00161	24	0.29167	0.36082	0.55541	0.00146	23	0.43478	0.3942	1	0	114	0.35088	0.35366	1	0	35	0.54286	0.42609	0.12546	0.00112	52	0.38462	0.33682	0.42299	0.0015	92	0.28261	0.2889	1	0	80	0.3375	0.37099	0.54353	0.00163	87	0.41379	0.38004	0.56913
Hz6_190	704	0.30398	0.30668	0.80333	0.00124	23	0.3913	0.37198	1	0	24	0.25	0.4539	0.05739	0.0007	23	0.43478	0.34783	0.54086	0.00149	114	0.26316	0.29059	0.33299	0.00154	35	0.25714	0.26874	1	0	52	0.36538	0.32543	0.66349	0.00148	92	0.29348	0.26699	0.46166	0.00141	83	0.31325	0.31311	1	0	86	0.40698	0.36523	0.37115
Hz6_193	705	0.05106	0.05517	0.1039	0.00099	23	0.08696	0.08502	1	0	24	0.04167	0.04167	1	0		Monomorphic locus. No test done				114	0.05263	0.06801	0.12207	0.00098		Monomorphic locus. No test done				52	0.07692	0.07468	1	0	92	0.05435	0.07359	0.10949	0.00093	83	0.04819	0.04732	1	0	87	0.06897	0.06697	1
Hz6_199	672	0.43452	0.48597	0.00687	0.00028	23	0.3913	0.47633	0.40639	0.00148	24	0.45833	0.50266	0.69777	0.00136	23	0.43478	0.48696	0.67374	0.00142	113	0.51327	0.49904	0.85085	0.00104	35	0.51429	0.50683	1	0	52	0.40385	0.46285	0.38058	0.00147	92	0.31522	0.46561	0.00365	0.00019	54	0.35185	0.47542	0.07637	0.0008	86	0.44186	0.50265	0.29041
Hz6_200	697	0.01722	0.0199	0.06535	0.00081		Monomorphic locus. No test done					Monomorphic locus. No test done					Monomorphic locus. No test done					Monomorphic locus. No test done					Monomorphic locus. No test done					Monomorphic locus. No test done				92	0.02174	0.04277	0.03239	0.00054	83	0.04819	0.04732	1	0	84	0.03571	0.03529	1
Hz6_213	701	0.18545	0.26478	0	0	23	0	0.50242	0	0	24	0.04167	0.36082	3e-05	2e-05	23	0	0.46377	0	0	114	0.18421	0.28484	0.0008	9e-05	35	0.22857	0.24845	0.52595	0.00165	51	0.21569	0.19433	1	0	91	0.21978	0.24625	0.37963	0.00151	81	0.16049	0.18902	0.19883	0.00122	87	0.25287	0.25566	1
Hz6_227	690	0.63623	0.45446	0	0		Monomorphic locus. No test done				24	0.08333	0.08156	1	0		Monomorphic locus. No test done				113	0.71681	0.47139	0	0	35	0.02857	0.02857	1	0	52	0.03846	0.03809	1	0	90	0.88889	0.50255	0	0	80	0.775	0.50031	0	0	86	0.87209	0.50122	0
Hz6_241	696	0.35776	0.4535	0	0	23	0.34783	0.46377	0.35421	0.00146	22	0.40909	0.50211	0.41766	0.00167	23	0.47826	0.50725	1	0	113	0.33628	0.4295	0.02857	0.00048	33	0.30303	0.4289	0.11437	0.00103	51	0.31373	0.48923	0.01814	0.00041	92	0.34783	0.4077	0.19977	0.0013	83	0.37349	0.41862	0.43217	0.00149	85	0.38824	0.46286	0.15963
Hz6_250	690	0.55362	0.42711	0	0	23	0.04348	0.04348	1	0		Monomorphic locus. No test done				23	0	0.08502	0.02205	0.00047	113	0.70796	0.49086	0	0	34	0.94118	0.50571	0	0	51	0.98039	0.50476	0	0	92	0.06522	0.08363	0.14724	0.00122	79	0.86076	0.49923	0	0	84	0.90476	0.50271	0
Hz6_260	687	0.0786	0.09677	0.0002	4e-05	23	0.13043	0.12464	1	0	24	0.125	0.11968	1	0	23	0.08696	0.08502	1	0	114	0.09649	0.09224	1	0	35	0.05714	0.05631	1	0	51	0.07843	0.0761	1	0	92	0.08696	0.10335	0.2266	0.00135	76	0.03947	0.06405	0.06769	0.00075	87	0.06897	0.08823	0.15672
Hz6_261	704	0.3054	0.31972	0.23975	0.00128	23	0.34783	0.34783	1	0	24	0.25	0.28369	0.50171	0.00152	22	0.18182	0.24101	0.32264	0.00143	114	0.35088	0.37221	0.61327	0.0016	35	0.31429	0.26874	0.56585	0.00156	52	0.36538	0.36875	1	0	92	0.31522	0.33589	0.53708	0.00157	83	0.22892	0.27404	0.20799	0.00129	87	0.26437	0.30915	0.17334
Hz6_276	697	0.72453	0.47399	0	0	22	0.95455	0.51057	2e-05	1e-05	24	0.91667	0.51064	7e-05	3e-05	23	0.95652	0.51014	0	0	113	0.95575	0.50218	0	0	35	0.94286	0.50725	0	0	51	0.98039	0.50476	0	0	89	0.96629	0.50276	0	0	83	0.06024	0.05878	1	0	86	0.9186	0.50231	0
Hz6_294	686	0.42711	0.33615	0	0		Monomorphic locus. No test done					Monomorphic locus. No test done					Monomorphic locus. No test done				113	0.72566	0.46442	0	0		Monomorphic locus. No test done					Monomorphic locus. No test done				84	0.82143	0.48695	0	0		Monomorphic locus. No test done					Monomorphic locus. No test done
Hz6_299	703	0.10242	0.1586	0	0	23	0.26087	0.23188	1	0	24	0.04167	0.11968	0.06483	0.00082	23	0.04348	0.04348	1	0	114	0.12281	0.14607	0.13425	0.00116	35	0.11429	0.20538	0.04317	0.00062	52	0.09615	0.15963	0.03314	0.0006	91	0.0989	0.13339	0.0562	0.00072	83	0.01205	0.14524	0	0	87	0.1954	0.19567	1
Hz6_304	703	0.42674	0.48504	0.00235	0.00012	23	0.47826	0.49565	1	0	24	0.29167	0.50975	0.04492	0.00073	23	0.3913	0.47633	0.40958	0.00154	114	0.39474	0.49753	0.03636	0.00057	35	0.42857	0.48075	0.71806	0.00138	52	0.46154	0.48618	0.77583	0.00126	90	0.36667	0.4923	0.01885	0.00037	83	0.38554	0.48193	0.10456	0.00105	87	0.4023	0.48136	0.16877
Hz6_310	704	0.4375	0.34204	0	0	23	0.34783	0.29372	1	0	24	0.54167	0.40337	0.13403	0.00102	23	0.30435	0.26377	1	0	114	0.44737	0.34883	0.00091	0.0001	35	0.48571	0.37308	0.1581	0.00111	52	0.44231	0.34783	0.05415	0.00072	92	0.55435	0.40289	4e-05	2e-05	83	0.38554	0.31311	0.03159	0.00052	86	0.34884	0.28968	0.06616
Hz6_327	700	0.37143	0.36207	0.54066	0.00137	23	0.3913	0.32174	0.5456	0.00153	24	0.33333	0.4539	0.34839	0.00156	23	0.34783	0.29372	1	0	112	0.32143	0.34833	0.42654	0.00158	35	0.25714	0.34161	0.15733	0.00112	52	0.32692	0.36875	0.45209	0.00152	91	0.20879	0.26938	0.0426	0.00058	81	0.95062	0.50188	0	0	87	0.32184	0.30191	0.72666
Hz6_346	703	0.50356	0.49812	0.8162	0.0011	23	0.47826	0.47633	1	0	24	0.5	0.50709	1	0	23	0.52174	0.51014	1	0	114	0.48246	0.50216	0.70431	0.00131	35	0.65714	0.49234	0.07954	0.00086	52	0.44231	0.50019	0.41345	0.00133	91	0.50549	0.4925	0.83662	0.00114	82	0.58537	0.49559	0.11578	0.00114	87	0.45977	0.49963	0.5093
Hz6_352	702	0.39459	0.36211	0.01994	0.0004	23	0.30435	0.37198	0.5637	0.00155	24	0.375	0.31117	0.55105	0.00155	23	0.43478	0.46377	1	0	114	0.31579	0.32352	0.77313	0.00133	35	0.22857	0.2882	0.23592	0.00144	52	0.44231	0.34783	0.05278	0.00064	92	0.3587	0.36012	1	0	81	0.93827	0.50119	0	0	87	0.25287	0.27161	0.45358
Hz6_361	704	0.03267	0.03216	1	0	23	0.08696	0.08502	1	0	24	0.04167	0.04167	1	0	23	0.04348	0.04348	1	0	113	0.00885	0.00885	1	0	35	0.02857	0.02857	1	0	52	0.03846	0.03809	1	0	92	0.08696	0.08363	1	0		Monomorphic locus. No test done				87	0.02299	0.02286	1
hZ6_386	702	0.01709	0.01696	1	0		Monomorphic locus. No test done					Monomorphic locus. No test done					Monomorphic locus. No test done				113	0.02655	0.02631	1	0		Monomorphic locus. No test done					Monomorphic locus. No test done					Monomorphic locus. No test done				82	0.02439	0.02424	1	0	87	0.02299	0.02286	1
Hz6_388	698	0.39685	0.45376	0.00071	8e-05	23	0.26087	0.46377	0.06314	0.00075	24	0.54167	0.4672	0.65579	0.00155	23	0.3913	0.37198	1	0	114	0.42982	0.48176	0.32301	0.00123	35	0.45714	0.45714	1	0	51	0.23529	0.40225	0.00421	0.00019	92	0.40217	0.47131	0.17947	0.0012	81	0.41975	0.43862	0.79754	0.00126	87	0.36782	0.43904	0.14405
Hz6_390	704	0.13068	0.23777	0	0	23	0.26087	0.23188	1	0	24	0.08333	0.15603	0.12647	0.00104	23	0.08696	0.08502	1	0	114	0.17544	0.22954	0.02408	0.0005	35	0.02857	0.42609	0	0	52	0	0.33682	0	0	92	0.17391	0.17748	1	0	83	0.19277	0.23133	0.14275	0.00102	87	0.16092	0.16796	0.53258
Hz6_393	705	0.00142	0.00142	1	0		Monomorphic locus. No test done					Monomorphic locus. No test done					Monomorphic locus. No test done					Monomorphic locus. No test done				35	0.02857	0.02857	1	0		Monomorphic locus. No test done					Monomorphic locus. No test done					Monomorphic locus. No test done					Monomorphic locus. No test done
Hz6_406	704	0.87074	0.492	0	0	23	1	0.51111	0	0	24	1	0.51064	0	0	23	1	0.51111	0	0	114	1	0.5022	0	0		Monomorphic locus. No test done					Monomorphic locus. No test done				92	1	0.50273	0	0	83	1	0.50303	0	0	86	1	0.50292	0
Hz6_408	700	0.45714	0.48202	0.16891	0.00098	23	0.52174	0.3942	0.27371	0.00139	24	0.33333	0.33688	1	0	23	0.34783	0.29372	1	0	113	0.51327	0.46914	0.41543	0.0016	35	0.4	0.43727	0.70004	0.0014	52	0.42308	0.44436	0.75978	0.00134	91	0.48352	0.36865	0.00125	0.00011	83	0.45783	0.36802	0.03134	0.00055	84	0.47619	0.37725	0.01911
Hz6_426	681	0.11894	0.11454	0.50238	0.00151		Monomorphic locus. No test done					Monomorphic locus. No test done					Monomorphic locus. No test done					Monomorphic locus. No test done					Monomorphic locus. No test done					Monomorphic locus. No test done				89	0	0.02234	0.00576	0.00022	80	0.025	0.02484	1	0	86	0.03488	0.03448	1
Hz6_429	702	0.39601	0.44089	0.00813	0.00028	23	0.34783	0.3942	0.60934	0.00146	24	0.375	0.48848	0.39394	0.00159	23	0.52174	0.51014	1	0	113	0.46903	0.47139	1	0	35	0.54286	0.44762	0.26472	0.00142	52	0.38462	0.44436	0.35872	0.0015	92	0.34783	0.4077	0.19242	0.00117	83	0.3012	0.3862	0.08461	0.00093	87	0.4023	0.45798	0.34958
Hz6_444	704	0.49006	0.49437	0.8131	0.00113	23	0.56522	0.50725	0.68635	0.00159	24	0.45833	0.48848	1	0	23	0.65217	0.51111	0.22862	0.00142	113	0.39823	0.47957	0.07443	0.00082	35	0.42857	0.48075	0.71799	0.00129	52	0.48077	0.48973	1	0	92	0.46739	0.49982	0.67371	0.00157	83	0.53012	0.49069	0.50415	0.00158	87	0.50575	0.50282	1
Hz6_536	692	0.31792	0.33318	0.26437	0.00133	23	0.04348	0.04348	1	0	24	0.20833	0.1906	1	0	23	0.04348	0.04348	1	0	112	0.70536	0.49067	0	0	35	0.08571	0.08323	1	0	52	0.13462	0.12677	1	0	92	0.11957	0.11303	1	0	83	0.22892	0.36166	0.00105	0.0001	80	0.2125	0.32948	0.00335
Hz6_551	703	0.37553	0.49554	0	0	23	0.30435	0.41449	0.30071	0.0014	24	0.375	0.43883	0.63481	0.0015	23	0.43478	0.43285	1	0	114	0.42105	0.44037	0.67681	0.00132	35	0.51429	0.45714	0.70369	0.00158	52	0.48077	0.4509	0.75859	0.00128	92	0.36957	0.43407	0.22798	0.00123	82	0.17073	0.17717	0.5493	0.00155	87	0.29885	0.31626	0.72717
Hz6_559	705	0.48369	0.49454	0.60742	0.00118	23	0.6087	0.50242	0.40552	0.00149	24	0.625	0.50266	0.40567	0.00148	23	0.3913	0.51111	0.40036	0.00166	114	0.5614	0.49973	0.19705	0.0012	35	0.51429	0.48696	1	0	52	0.5	0.49813	1	0	92	0.55435	0.50125	0.40504	0.00162	83	0.42169	0.42826	1	0	87	0.3908	0.38004	1
Hz6_580	689	0.11756	0.11584	1	0		Monomorphic locus. No test done					Monomorphic locus. No test done					Monomorphic locus. No test done				114	0.01754	0.01747	1	0	35	0.02857	0.02857	1	0	52	0.01923	0.01923	1	0		Monomorphic locus. No test done				83	0.07229	0.0701	1	0	87	0.08046	0.07767	1
Hz6_589	705	0.07092	0.17899	0	0		Monomorphic locus. No test done					Monomorphic locus. No test done					Monomorphic locus. No test done				114	0.04386	0.04309	1	0	35	0.05714	0.05631	1	0	52	0.03846	0.03809	1	0	92	0.02174	0.02162	1	0		Monomorphic locus. No test done				87	0.3908	0.41193	0.60742
Hz6_620	699	0.40916	0.4991	0	0	22	0.40909	0.4852	0.65102	0.0015	24	0.5	0.49645	1	0	23	0.21739	0.41449	0.03431	0.00053	114	0.39474	0.50185	0.02441	0.00048	35	0.4	0.50683	0.31061	0.00148	52	0.38462	0.49813	0.15624	0.00113	89	0.41573	0.50282	0.14152	0.00104	83	0.3494	0.48872	0.01198	0.00035	87	0.35632	0.49332	0.01763
Hz6_667	705	0.00567	0.00566	1	0		Monomorphic locus. No test done					Monomorphic locus. No test done					Monomorphic locus. No test done				114	0.00877	0.00877	1	0	35	0.02857	0.02857	1	0		Monomorphic locus. No test done					Monomorphic locus. No test done					Monomorphic locus. No test done					Monomorphic locus. No test done
Hz6_707	702	0.25214	0.2732	0.05351	0.00068	23	0.08696	0.08502	1	0	24	0.25	0.2234	1	0	23	0.13043	0.12464	1	0	113	0.23009	0.24417	0.45856	0.00162	35	0.14286	0.18261	0.28232	0.0014	52	0.21154	0.191	1	0	92	0.15217	0.17748	0.19524	0.00115	82	0.15854	0.18697	0.19428	0.00124	87	0.17241	0.17733	0.5796
Hz6_733	660	0.22576	0.34566	0	0	22	0	0.30444	0.00014	4e-05	22	0	0.16913	0.0019	0.00013	22	0.04545	0.20613	0.00836	0.00028	104	0.61538	0.49777	0.01595	0.00035	34	0	0.05795	0.01352	0.00036	52	0.01923	0.22087	0	0	87	0.06897	0.22218	0	0	78	0.02564	0.18528	0	0	83	0.07229	0.24885	0
Hz6_809	668	0.18563	0.34352	0	0	23	0.08696	0.3942	0.0006	7e-05	24	0.125	0.40337	0.00153	0.00012	23	0.26087	0.3942	0.12503	0.00095	107	0.21495	0.32263	0.00105	0.0001	33	0.15152	0.41632	0.00072	8e-05	50	0.12	0.34667	3e-05	2e-05	83	0.18072	0.39759	0	0	78	0.19231	0.28809	0.00799	0.0003	84	0.16667	0.27944	0.00118
Hz6_875	705	0.00142	0.00425	0.00251	0.00015		Monomorphic locus. No test done					Monomorphic locus. No test done					Monomorphic locus. No test done				114	0.00877	0.00877	1	0		Monomorphic locus. No test done				52	0	0.03809	0.01037	0.00032		Monomorphic locus. No test done					Monomorphic locus. No test done					Monomorphic locus. No test done
Hz6_954	702	0.49573	0.50025	0.81463	0.0012	23	0.47826	0.47633	1	0	23	0.52174	0.51014	1	0	23	0.52174	0.48696	1	0	113	0.53982	0.50081	0.45114	0.00152	35	0.54286	0.49234	0.72661	0.00138	52	0.36538	0.48226	0.09245	0.00088	92	0.41304	0.49679	0.14016	0.00107	83	0.54217	0.49573	0.50116	0.00155	86	0.46512	0.50265	0.51377
Hz6_992	701	0.21969	0.20234	0.02191	0.00046		Monomorphic locus. No test done					Monomorphic locus. No test done					Monomorphic locus. No test done				113	0.72566	0.47355	0	0		Monomorphic locus. No test done					Monomorphic locus. No test done					Monomorphic locus. No test done					Monomorphic locus. No test done				87	0.01149	0.01149	1
Hz6_1004	704	0.41903	0.40521	0.40029	0.00134	23	0.34783	0.29372	1	0	24	0.33333	0.42199	0.34259	0.00153	23	0.43478	0.3942	1	0	114	0.48246	0.41684	0.11639	0.00094	35	0.51429	0.43727	0.43488	0.00152	52	0.36538	0.42252	0.33431	0.00161	92	0.46739	0.41239	0.30432	0.00147	83	0.39759	0.41862	0.79176	0.00128	87	0.32184	0.35612	0.37363
Hz6_1018	702	0.2792	0.28923	0.35576	0.0014	23	0.13043	0.12464	1	0		Monomorphic locus. No test done				23	0.13043	0.12464	1	0	114	0.70175	0.49664	1e-05	1e-05	34	0.02941	0.02941	1	0	52	0.07692	0.07468	1	0	92	0.1413	0.13204	1	0	83	0.08434	0.08127	1	0	87	0.10345	0.11913	0.28667
Hz6_1142	699	0.1588	0.15824	1	0	23	0.08696	0.08502	1	0	24	0.04167	0.04167	1	0	23	0.04348	0.04348	1	0	114	0.04386	0.04309	1	0	32	0.96875	0.50744	0	0	51	0.96078	0.50417	0	0	92	0.05435	0.05316	1	0	83	0.0241	0.04732	0.03525	0.00058	86	0.04651	0.0457	1
Hz6_1150	701	0.41512	0.47621	0.00051	8e-05	23	0.47826	0.51111	1	0	24	0.5	0.4539	1	0	22	0.27273	0.49471	0.06985	0.00087	114	0.35965	0.46012	0.02506	0.00051	35	0.51429	0.50352	1	0	52	0.38462	0.49291	0.15521	0.00127	92	0.42391	0.48129	0.28122	0.00139	83	0.44578	0.46097	0.81333	0.00122	87	0.43678	0.49485	0.29507
Hz6_1223	700	0.46286	0.35599	0	0		Monomorphic locus. No test done					Monomorphic locus. No test done					Monomorphic locus. No test done				113	0.76106	0.47355	0	0		Monomorphic locus. No test done				52	0.01923	0.01923	1	0		Monomorphic locus. No test done				83	0.87952	0.49573	0	0	87	1	0.50289	0
Hz6_1264	705	0.48794	0.49973	0.55654	0.0014	23	0.56522	0.51111	0.68662	0.00146	24	0.375	0.50975	0.24466	0.00151	23	0.65217	0.49565	0.19972	0.00119	114	0.48246	0.50185	0.71353	0.00133	35	0.6	0.48075	0.17121	0.00113	52	0.51923	0.49571	0.78	0.00123	92	0.48913	0.5022	0.833	0.0011	83	0.44578	0.50303	0.38037	0.0015	87	0.47126	0.50183	0.67102
Hz6_1311	702	0.49715	0.49972	0.94079	0.00072	23	0.56522	0.49565	0.67135	0.00159	24	0.54167	0.48848	0.68411	0.00158	23	0.52174	0.51014	1	0	114	0.46491	0.49907	0.5821	0.00145	35	0.51429	0.50683	1	0	52	0.51923	0.50467	1	0	91	0.53846	0.50252	0.53706	0.00162	82	0.45122	0.49701	0.49591	0.00149	87	0.47126	0.50262	0.66214
Hz6_1338	705	0.01986	0.01967	1	0		Monomorphic locus. No test done					Monomorphic locus. No test done					Monomorphic locus. No test done				114	0.03509	0.03462	1	0	35	0.02857	0.02857	1	0	52	0.01923	0.01923	1	0		Monomorphic locus. No test done					Monomorphic locus. No test done				87	0.02299	0.02286	1
Hz6_1630	692	0.5448	0.39668	0	0		Monomorphic locus. No test done					Monomorphic locus. No test done					Monomorphic locus. No test done				114	0.76316	0.47403	0	0		Monomorphic locus. No test done					Monomorphic locus. No test done					Monomorphic locus. No test done				81	0.85185	0.49206	0	0	84	0.92857	0.50043	0
Hz6_1646	694	0.21614	0.19292	0.00023	5e-05		Monomorphic locus. No test done					Monomorphic locus. No test done					Monomorphic locus. No test done				111	0.74775	0.4703	0	0		Monomorphic locus. No test done					Monomorphic locus. No test done					Monomorphic locus. No test done					Monomorphic locus. No test done					Monomorphic locus. No test done
Hz6_1764	705	0.00142	0.00142	1	0		Monomorphic locus. No test done					Monomorphic locus. No test done					Monomorphic locus. No test done					Monomorphic locus. No test done				35	0.02857	0.02857	1	0		Monomorphic locus. No test done					Monomorphic locus. No test done					Monomorphic locus. No test done					Monomorphic locus. No test done
Hz6_1790	701	0.00571	0.00569	1	0		Monomorphic locus. No test done					Monomorphic locus. No test done					Monomorphic locus. No test done				114	0.01754	0.01747	1	0		Monomorphic locus. No test done					Monomorphic locus. No test done					Monomorphic locus. No test done				83	0.0241	0.02395	1	0		Monomorphic locus. No test done
[truncated: 36 more columns]

## Sheet: Table S8-Global Exact Tests
	Table S8. Exact test (global) P-values for sample differentiation based on genotype frequencies calculated with 20,000 Markov chain steps using ARLEQUIN 3.52.
	Non-differentiation exact P value= 0.80000± 0.14720 (20000 Markov steps done). Above diagonal symbols indicate significant (+) or non-significant (-)
	differentiation between population pairs (P≤0.01)
		02RS-Aug12	18LV-Aug13	18RS-Aug06	18LV-Aug06	02RS-Aug20	18LV-Aug20	05LV-Aug19	05LV-Aug24	18RS-Aug23	18RS-Aug30	16RS-Sep01	02RS-Sep03	16LV-Sep02	05LV-Sep03	02RS-Aug27	18LV-Aug27
1	02RS-Aug12		-	-	-	-	-	-	-	-	-	-	-	-	-	-	-
2	18LV-Aug13	1.00000+-0.0000		-	-	-	-	-	-	-	-	-	-	-	-	-	-
3	18RS-Aug06	1.00000+-0.0000	1.00000+-0.0000		-	-	-	-	-	-	-	-	-	-	-	-	-
4	18LV-Aug06	1.00000+-0.0000	1.00000+-0.0000	1.00000+-0.0000		-	-	-	-	-	-	-	-	-	-	-	-
5	02RS-Aug20	0.55935+-0.0244	0.54765+-0.0457	0.53160+-0.0404	0.58405+-0.0602		-	-	-	-	-	-	-	-	-	-	-
6	18LV-Aug20	0.53065+-0.0434	0.57965+-0.0418	0.55970+-0.0510	0.55120+-0.0909	0.23925+-0.0409		-	-	-	-	-	-	-	-	-	-
7	05LV-Aug19	1.00000+-0.0000	1.00000+-0.0000	1.00000+-0.0000	1.00000+-0.0000	0.53135+-0.0887	0.55155+-0.0488		-	-	-	-	-	-	-	-	-
8	05LV-Aug24	1.00000+-0.0000	1.00000+-0.0000	1.00000+-0.0000	1.00000+-0.0000	0.62740+-0.0432	0.45575+-0.0512	1.00000+-0.0000		-	-	-	-	-	-	-	-
9	18RS-Aug23	1.00000+-0.0000	1.00000+-0.0000	1.00000+-0.0000	1.00000+-0.0000	0.56935+-0.0652	0.49740+-0.0720	1.00000+-0.0000	1.00000+-0.0000		-	-	-	-	-	-	-
10	18RS-Aug30	1.00000+-0.0000	1.00000+-0.0000	1.00000+-0.0000	1.00000+-0.0000	0.50670+-0.0467	0.55960+-0.0655	1.00000+-0.0000	1.00000+-0.0000	1.00000+-0.0000		-	-	-	-	-	-
11	16RS-Sep01	1.00000+-0.0000	1.00000+-0.0000	1.00000+-0.0000	1.00000+-0.0000	0.44315+-0.0398	0.56795+-0.0497	1.00000+-0.0000	1.00000+-0.0000	1.00000+-0.0000	1.00000+-0.0000		-	-	-	-	-
12	02RS-Sep03	1.00000+-0.0000	1.00000+-0.0000	1.00000+-0.0000	1.00000+-0.0000	0.50635+-0.0494	0.60855+-0.0481	1.00000+-0.0000	1.00000+-0.0000	1.00000+-0.0000	1.00000+-0.0000	1.00000+-0.0000		-	-	-	-
13	16LV-Sep02	1.00000+-0.0000	1.00000+-0.0000	1.00000+-0.0000	1.00000+-0.0000	0.52295+-0.0330	0.48270+-0.0311	1.00000+-0.0000	1.00000+-0.0000	1.00000+-0.0000	1.00000+-0.0000	1.00000+-0.0000	1.00000+-0.0000		-	-	-
14	05LV-Sep03	1.00000+-0.0000	1.00000+-0.0000	1.00000+-0.0000	1.00000+-0.0000	0.46395+-0.0359	0.47455+-0.0468	1.00000+-0.0000	1.00000+-0.0000	1.00000+-0.0000	1.00000+-0.0000	1.00000+-0.0000	1.00000+-0.0000	1.00000+-0.0000		-	-
15	02RS-Aug27	1.00000+-0.0000	1.00000+-0.0000	1.00000+-0.0000	1.00000+-0.0000	0.46205+-0.0431	0.50270+-0.0663	1.00000+-0.0000	1.00000+-0.0000	1.00000+-0.0000	1.00000+-0.0000	1.00000+-0.0000	1.00000+-0.0000	1.00000+-0.0000	1.00000+-0.0000		-
16	18LV-Aug27	1.00000+-0.0000	1.00000+-0.0000	1.00000+-0.0000	1.00000+-0.0000	0.52650+-0.0565	0.55830+-0.0451	1.00000+-0.0000	1.00000+-0.0000	1.00000+-0.0000	1.00000+-0.0000	1.00000+-0.0000	1.00000+-0.0000	1.00000+-0.0000	1.00000+-0.0000	1.00000+-0.0000

## Sheet: Table S9- Pairwise Fst
Table S9a. Pairwise FST value estimates (below diagonal) and significant (P≤0.01) FST values (above diagonal) for 16 putative populations of Helicoverpa zea, partitioned by collection date, from Landisville and Rock Springs, PA. A plus (+) sign indicates an FST value that significantly deviated from zero. FST estimates significantly deviated from zero are also color coded in green.
	02RS-Aug12	02RS-Aug27	02RS-Aug20	02RS-Sep03	05LV-Aug19	05LV-Sep03	05LV-Aug24	16LV-Sep02	16RS-Sep01	18LV-Aug06	18LV-Aug20	18LV-Aug27	18LV-Aug13	18RS-Aug06	18RS-Aug23	18RS-Aug30
02RS-Aug12		-	-	-	+	+	+	+	+	+	+	+	+	+	+	+
02RS-Aug27	-0.009		-	-	+	+	+	+	+	+	+	+	+	+	+	+
02RS-Aug20	0.02432	0.00807		-	+	+	+	+	+	+	+	+	+	+	+	+
02RS-Sep03	-0.055	-0.04444	-0.04369		-	-	-	+	+	+	+	+	+	+	+	+
05LV-Aug19	0.09081	0.10156	0.07939	-0.012		+	-	+	+	+	+	+	+	+	+	+
05LV-Sep03	0.13463	0.12372	0.10153	-0.02791	0.13563		+	+	+	+	+	+	+	+	+	+
05LV-Aug24	0.08535	0.08817	0.07339	-0.05999	0.0036	0.13236		+	+	+	+	+	+	+	+	+
16LV-Sep02	0.22041	0.20306	0.20436	0.07554	0.21649	0.16792	0.21613		+	+	+	+	+	+	+	+
16RS-Sep01	0.1572	0.15056	0.14855	0.09496	0.18264	0.17936	0.16745	0.09959		+	+	+	+	+	+	+
18LV-Aug06	0.07825	0.08285	0.06501	0.07194	0.21126	0.14609	0.15418	0.23231	0.2387		-	-	-	+	+	+
18LV-Aug20	0.12881	0.12455	0.11089	0.07792	0.24175	0.20192	0.20768	0.27415	0.24453	-0.02211		-	-	+	+	+
18LV-Aug27	0.10276	0.09009	0.08951	0.09879	0.23652	0.14729	0.17292	0.25336	0.23412	0.01058	-0.02352		-	+	+	+
18LV-Aug13	0.07051	0.06861	0.05309	0.07994	0.20199	0.14896	0.16263	0.26662	0.24318	0.01666	0.02491	0.02859		+	+	+
18RS-Aug06	0.1859	0.16886	0.16417	0.05971	0.18893	0.13249	0.19359	0.2152	0.2011	0.15286	0.1993	0.17364	0.19549		-	-
18RS-Aug23	0.16869	0.15977	0.17489	0.04128	0.18722	0.14966	0.17665	0.16628	0.18055	0.16025	0.22109	0.20359	0.19621	-0.00391		-
18RS-Aug30	0.21171	0.19942	0.20719	0.07763	0.18031	0.14652	0.18803	0.20847	0.19406	0.1797	0.23187	0.21595	0.20761	0.01581	0.01248
Table S9b. Pairwise FST value estimates (below diagonal) and significant (P≤0.01) FST values (above diagonal) for 6 populations of Helicoverpa zea, pooled by collection year, from Landisville and Rock Springs, PA. A plus (+) sign indicates an FST value that significantly deviated from zero. FST estimates significantly deviated from zero are also color coded in green.
	02RS	05LV	16LV	16RS	18LV	18RS
02RS		-	+	+	+	+
05LV	-0.01034		+	+	+	+
16LV	0.1221	0.17098		+	+	+
16RS	0.12366	0.16324	0.09959		+	+
18LV	0.10027	0.13919	0.22795	0.22493		+
18RS	0.10677	0.12958	0.19127	0.19501	0.18521

## Sheet: Table S10-Pairwise differences
Table S10. Pairwise differences between Helicoverpa zea populations. Average pairwise differences between populations (above diagonal) and within populations (diagonal) and corrected average pairwise differences between populations (below diagonal) of H. zea samples partitioned by collection date within each year (A) and pooled by collection year and collection site (B) for populations from Landi…
Table S9a
	02RS-Aug12	02RS-Aug27	02RS-Aug20	02RS-Sep03	05LV-Aug19	05LV-Sep03	05LV-Aug24	16LV-Sep02	16RS-Sep01	18LV-Aug06	18LV-Aug20	18LV-Aug27	18LV-Aug13	18RS-Aug06	18RS-Aug23	18RS-Aug30
02RS-Aug12	82.5086	82.1132	88.4728	162.371	100.909	103.458	93.0927	130.442	135.754	150.501	131.29	147.224	132.851	128.474	123.562	129.878
02RS-Aug27	-0.73937	83.1965	87.3686	164.943	102.512	102.48	93.7439	127.774	134.929	151.631	131.059	145.537	132.952	126.223	122.627	128.298
02RS-Aug20	2.15724	0.70905	90.1225	168.424	103.659	103.415	95.8257	131.725	138.143	152.314	132.913	149.097	134.372	129.506	128.922	133.781
02RS-Sep03	-10.5978	-8.36945	-8.35168	263.429	180.109	174.35	164.154	206.403	223.954	249.322	227.253	250.417	236.478	210.904	203.745	213.802
05LV-Aug19	9.39688	10.6551	8.33974	-1.86357	100.517	113.078	94.3435	139.261	149.336	184.279	160.922	181.97	163.994	139.179	136.616	135.18
05LV-Sep03	14.5418	13.2194	10.6916	-5.02676	15.1572	95.3243	105.574	126.998	143.363	163.988	147.083	157.19	148.386	126.07	126.394	125.717
05LV-Aug24	8.05788	8.36508	6.98388	-11.3416	0.30468	14.1318	87.5611	130.945	138.239	162.507	144.066	158.393	147.02	130.716	126.064	127.36
16LV-Sep02	31.081	28.0694	28.5571	16.582	30.8967	21.2298	29.0578	116.213	142.428	195.227	177.443	192.648	185.922	153.586	142.546	149.937
16RS-Sep01	24.3936	23.2239	22.9751	22.1329	28.9712	25.5946	24.3517	14.2154	140.213	214.641	189.344	206.034	198.847	167.726	161.108	163.946
18LV-Aug06	11.7773	12.5632	9.7827	20.1371	36.5505	18.856	21.2571	39.651	47.0652	194.939	167.326	190.164	182.87	188.996	187.724	192.687
18LV-Aug20	16.5216	15.9475	14.3384	22.0245	37.15	25.9071	26.7719	45.8231	45.7244	-3.65726	147.027	160.466	159.86	170.134	171.928	174.522
18LV-Aug27	15.2799	13.249	13.3462	28.0123	41.0219	18.8374	23.9222	43.8521	45.2381	2.00399	-3.73762	181.38	178.142	185.75	189.627	193.175
18LV-Aug13	9.26383	9.02074	6.97853	22.4304	31.4025	18.3915	20.9064	45.4831	46.4075	3.06808	4.01334	5.11951	164.665	180.228	177.471	180.365
18RS-Aug06	24.1811	21.5859	21.4053	16.1507	25.8813	15.3689	23.8966	32.4408	34.5808	28.487	33.5811	32.0211	34.8567	126.078	123.55	125.956
18RS-Aug23	21.3102	20.0303	22.8625	11.0325	25.3591	17.7341	21.2855	23.442	30.0031	29.2566	37.4157	37.9388	34.14	-0.48654	121.996	123.462
18RS-Aug30	27.7007	25.7768	27.7968	21.1644	23.9982	17.132	22.657	30.9074	32.9172	34.2941	40.0852	41.5624	37.1096	1.99421	1.54099	121.846
Table S10b.
	02RS	05LV	16LV	16RS	18LV	18RS
02RS	191.451	144.655	177.339	190.608	203.432	178.248
05LV	-1.49738	100.854	130.298	142.628	157.484	128.407
16LV	23.5067	21.7646	116.213	142.428	188.235	148.444
16RS	24.7761	22.095	14.2154	140.213	202.731	164.146
18LV	20.7263	20.0773	43.1489	45.6451	173.96	183.116
18RS	20.5632	16.0203	28.3778	32.0797	34.1765	123.919

[truncated: 4 more sheets: Table S11-Number of linked loci, Figure S1, Figure S2, Figure S3]
